# Supplementary material for: Ruthenium-catalysed meta-selective CAr–H bond alkylation via a deaminative strategy
Source: Royal Society of Chemistry journal article supplement (doi:10.1039/d1cc00039j), 2021-01-01

**Supporting Information**  
**For**  
**Ruthenium-Catalyzed *meta*-Selective C<sub>Ar</sub>–H Bond Alkylation via**  
**Deaminative Strategy**

Ze-Fan Zhu, Guang-Le Chen, Feng Liu\*

Jiangsu Key Laboratory of Neuropsychiatric Diseases and Department of Medicinal Chemistry, College of Pharmaceutical Sciences, Soochow University, 199 Ren-Ai Road, Suzhou, Jiangsu 215123, People's Republic of China

E-mail: [fliu2@suda.edu.cn](mailto:fliu2@suda.edu.cn)

**Table of contents**

|                                                                 |           |
|-----------------------------------------------------------------|-----------|
| <b>1. General remarks .....</b>                                 | <b>1</b>  |
| <b>2. Synthesis of <i>N</i>-containing aromatics .....</b>      | <b>1</b>  |
| <b>3. Optimization of reaction conditions .....</b>             | <b>3</b>  |
| <b>4. General experimental procedure .....</b>                  | <b>4</b>  |
| <b>5. Mechanistic studies .....</b>                             | <b>5</b>  |
| <b>6. Characterization of the substrates and products .....</b> | <b>8</b>  |
| <b>7. NMR Spectra for the substrates and products.....</b>      | <b>25</b> |

## 1. General remarks

$^1\text{H}$  NMR spectra were recorded on 400 or 600 MHz (100 or 150 MHz for  $^{13}\text{C}$  NMR, 376 or 564 MHz for  $^{19}\text{F}$  NMR) agilent NMR spectrometer with  $\text{CDCl}_3$  as the solvent and tetramethylsilane (TMS) as the internal standard. Chemical shifts were reported in parts per million (ppm,  $\delta$  scale) downfield from TMS at 0.00 ppm and referenced to the  $\text{CDCl}_3$  at 7.26 ppm (for  $^1\text{H}$  NMR) or 77.16 ppm (for  $^{13}\text{C}$  NMR), DMSO at 2.50 ppm (for  $^1\text{H}$  NMR) or 39.51 ppm (for  $^{13}\text{C}$  NMR).  $^{19}\text{F}$  NMR chemical shifts were determined relative to  $\text{CFCl}_3$  at  $\delta$  0.00 ppm. Mass spectroscopy data of the products were collected on a GCT PremierTM (CI) and Agilent Technologies 1290 Infinity (ESI). Mass Spectrometer Infrared (FT-IR) spectra were recorded on a Varian 1000FT-IR,  $\nu_{\text{max}}$  in  $\text{cm}^{-1}$ . Melting points were measured using SGW, X-4B and values are uncorrected. The Katritzky salts were prepared according to our previous report (*Chem. Commun.* **2019**, 55, 11478-11481) and all commercially available reagents and solvents were used as received unless otherwise specified.

## 2. Synthesis of N-containing aromatics

### Procedure A:

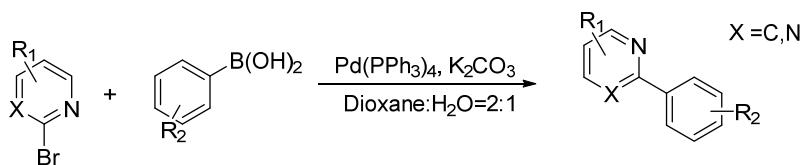

To a solution of 2-bromopyridines (2 mmol, 1 equiv) and corresponding boronic acid (3 mmol, 1.5 equiv) in 1,4-dioxane (2 mL) and  $\text{H}_2\text{O}$  (1 mL) was added  $\text{Pd(PPh}_3)_4$  (0.1 mmol, 5 mol%) and  $\text{K}_2\text{CO}_3$  (4.0 mmol, 2.0 equiv) under argon in a sealed tube. The resulting mixture was heated at 180 °C for 1 h under microwave conditions. To the reaction mixture was added saturated aqueous  $\text{NH}_4\text{Cl}$ , extracted by EtOAc for three times, dried over with anhydrous  $\text{Na}_2\text{SO}_4$ , and evaporated in vacuum to afford the crude product, which was further purified by flash chromatography on silica gel with *n*-hexane/EtOAc to give the corresponding substrates. (X.-F. Rao, C. Liu, J.-S. Qiu and Z.-L. Jin, *Org. Biomol. Chem.*, **2012**, 10, 7875-7883)

### Procedure B:

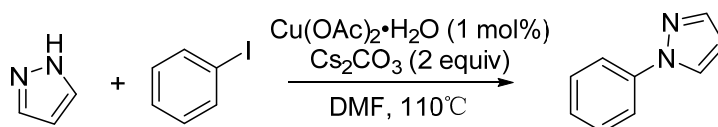

To a 10 mL two-neck bottle equipped with a magnetic stir bar was added pyrrole (2 mmol, 1 equiv), iodobenzene (2.4 mmol, 1.2 equiv), copper acetate (0.02 mmol, 1 mol%), cesium carbonate (4 mmol, 2.0 equiv), and DMF (4 mL, 0.5 M) under argon. The resulting mixture was stirred for 24 h at 110 °C. After the reaction was completed (monitored by TLC), the reaction mixture was extracted with ethyl acetate for three times, dried over with anhydrous  $\text{Na}_2\text{SO}_4$ , and evaporated in vacuum to afford the crude product, which was further purified by flash chromatography on silica gel with

*n*-hexane/EtOAc to give the title compound. (Z.-L. Xu, H.-X. Li, Z.-G. Ren, W.-Y. Du, W.-C. Xu, and J.-P. Lang, *Tetrahedron*, **2011**, 67, 5282-5288)

#### Procedure C:

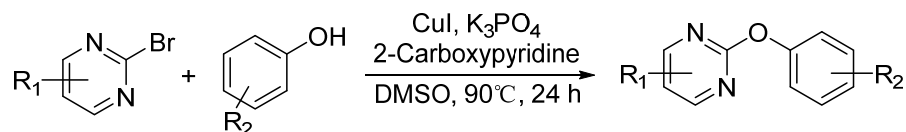

To a 25 mL round bottomed flask, was successively added ArOH (2 mmol, 1 equiv), 2-bromopyrimidine (2.4 mmol, 1.2 equiv), CuI (0.2 mmol, 10 mol%), picolinic acid (0.4 mmol, 20 mol%), K3PO4 (4 mmol, 2 equiv), and DMSO (4 mL, 0.5 M) under argon. The resulting mixture was heated at 90 °C for 24 h. After cooling to room temperature, ethyl acetate and water were added. The organic layer was separated and the aqueous layer was extracted twice more with ethyl acetate. Combined organic layer was dried over Na2SO4 and filtered through the pad of silica gel. The filtrate was concentrated and the resulting residue was purified by flash column chromatography to obtain the desired products. (G. Li, P.-P. Gao, X.-L. Lv, C. Qu, Q.-K. Yan, Y. Wang, S.-L. Yang, and J.-J. Wang, *Org. Lett.*, **2017**, 19, 2682–2685)

#### Procedure D:

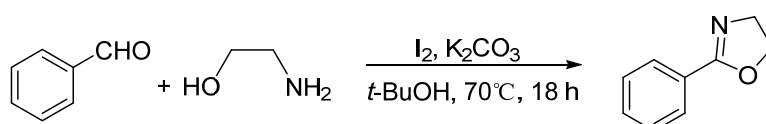

To a solution of *p*-tolualdehyde (0.51 mL, 5 mmol) in *tert*-butyl alcohol (20 mL) was added aminoethanol (0.33 mL, 5.5 mmol). After being stirred at room temperature under an argon atmosphere for 30 min, the resulting mixture was added K2CO3 (2.1 g, 15.0 mmol) and I2 (1.58 g, 6.25 mmol). The reaction mixture was stirred at 70 °C for 18 h. The resulting mixture was quenched with sat.aq Na2SO3 until the iodine color almost disappeared and then extracted with Et2O. The organic layer was washed with brine and dried over Na2SO4. After filtration, the solvent was removed in vacuo. The residue was chromatographed on neutral silica gel (AcOEt) to give the title compound. (M. Ishihara and H. Togo, *Tetrahedron*, **2007**, 63, 1474–1480)

#### Procedure E:

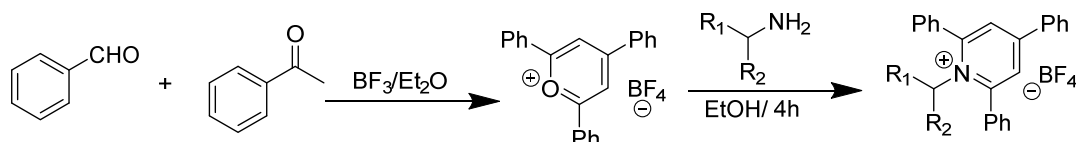

**Synthesis of triphenylpyrylium tetrafluoroborate:** Benzaldehyde (1 equiv) and acetophenone (2 equiv) were placed in a closed two-necked flask equipped with a magnetic stirrer, then boron trifluoride etherate (2.5 equiv) was added dropwise under argon treatment. The mixture was reacted at 100 °C for two hours and cooled to ambient temperature. Methyl *tert*-butyl ether was added to the reaction mixture and the resulting suspension stirred at ambient temperature. The solid was collected by

filtration and washed with methyl *tert*-butyl ether. Recrystallization by acetone and methyl *tert*-butyl ether to get pure light yellow solid.

A closed flask equipped with a magnetic stir bar was charged with triphenylpyrylium tetrafluoroborate (1.0 equiv) and the corresponding primary amine (1.2 equiv). Ethanol (1.0 M) was added to the reaction vessel and the tube sealed. No precautions to protect the reaction mixture from air and moisture were taken. The reaction mixture was heated to 90 °C for 4 h and then cooled to ambient temperature. Methyl *tert*-butyl ether was added to the reaction mixture and the resulting suspension stirred at room temperature. The solid was collected by filtration and washed with methyl *tert*-butyl ether. After the operations required the solids were dried under reduced pressure to obtain the analytically pure pyridinium salts.

Amine hydrochlorides as starting materials: In case amine hydrochlorides were used as feedstocks for the pyridinium salts, the amine hydrochloride (1.2 equiv) was added to a clean and closed flask. Ethanol (1.0 M) and triethyl amine (1.2 equiv) were added. The resulting suspension was stirred for 30 min at ambient temperature. Triphenylpyrylium tetrafluoroborate (1.0 equiv) was added, the tube sealed and stirred for 4 h at 90 °C. Methyl *tert*-butyl ether was added to the reaction mixture and the resulting suspension stirred at room temperature for at least 1 h to complete the precipitation process. The solid was collected by filtration and washed with methyl *tert*-butyl ether. After the operations required the solids were dried under reduced pressure to obtain the analytically pure pyridinium salts. To remove water-soluble impurities, the collected solids were washed with water before washing with methyl *tert*-butyl ether. (*Org. Biomol. Chem.*, **2019**, *17*, 1531-1534.)

### 3. Optimization of reaction conditions

**Table S1** Optimization of reaction conditions. <sup>a</sup>

| entry          | solvent            | base                           | ligand/additive                       | yield (%) <sup>b</sup> |
|----------------|--------------------|--------------------------------|---------------------------------------|------------------------|
| 1              | 1,4-dioxane        | K <sub>2</sub> CO <sub>3</sub> | MesCO <sub>2</sub> H/PPh <sub>3</sub> | 73                     |
| 2              | PhCH <sub>3</sub>  | K <sub>2</sub> CO <sub>3</sub> | MesCO <sub>2</sub> H/PPh <sub>3</sub> | 0                      |
| 3              | DMA                | K <sub>2</sub> CO <sub>3</sub> | MesCO <sub>2</sub> H/PPh <sub>3</sub> | < 5                    |
| 4 <sup>c</sup> | THF                | K <sub>2</sub> CO <sub>3</sub> | MesCO <sub>2</sub> H/PPh <sub>3</sub> | 40                     |
| 5 <sup>c</sup> | CH <sub>3</sub> CN | K <sub>2</sub> CO <sub>3</sub> | MesCO <sub>2</sub> H/PPh <sub>3</sub> | < 5                    |

|                 |                    |                                    |                                                       |           |
|-----------------|--------------------|------------------------------------|-------------------------------------------------------|-----------|
| 6 <sup>c</sup>  | DCE                | K <sub>2</sub> CO <sub>3</sub>     | MesCO <sub>2</sub> H/PPh <sub>3</sub>                 | 37        |
| 7               | 1,4-dioxane        | Na <sub>2</sub> CO <sub>3</sub>    | MesCO <sub>2</sub> H/PPh <sub>3</sub>                 | 40        |
| 8               | 1,4-dioxane        | Cs <sub>2</sub> CO <sub>3</sub>    | MesCO <sub>2</sub> H/PPh <sub>3</sub>                 | 36        |
| 9               | 1,4-dioxane        | K <sub>3</sub> PO <sub>4</sub>     | MesCO <sub>2</sub> H/PPh <sub>3</sub>                 | 66        |
| 10              | 1,4-dioxane        | K <sub>2</sub> CO <sub>3</sub>     | PivOH/PPh <sub>3</sub>                                | 69        |
| 11              | 1,4-dioxane        | K <sub>2</sub> CO <sub>3</sub>     | Piv-Val-OH/PPh <sub>3</sub>                           | 44        |
| 12              | 1,4-dioxane        | K <sub>2</sub> CO <sub>3</sub>     | 1-AdCO <sub>2</sub> H/PPh <sub>3</sub>                | 51        |
| <b>13</b>       | <b>1,4-dioxane</b> | <b>K<sub>2</sub>CO<sub>3</sub></b> | <b>CSA/PPh<sub>3</sub></b>                            | <b>91</b> |
| 14              | 1,4-dioxane        | K <sub>2</sub> CO <sub>3</sub>     | (PhO) <sub>2</sub> PO <sub>2</sub> H/PPh <sub>3</sub> | 87        |
| 15              | 1,4-dioxane        | K <sub>2</sub> CO <sub>3</sub>     | CSA/P( <i>o</i> -Tol) <sub>3</sub>                    | 60        |
| 16              | 1,4-dioxane        | K <sub>2</sub> CO <sub>3</sub>     | CSA/PCy <sub>3</sub>                                  | 52        |
| 17 <sup>d</sup> | 1,4-dioxane        | K <sub>2</sub> CO <sub>3</sub>     | CSA/PPh <sub>3</sub>                                  | < 5       |
| 18 <sup>e</sup> | 1,4-dioxane        | K <sub>2</sub> CO <sub>3</sub>     | CSA/PPh <sub>3</sub>                                  | 52        |
| 19 <sup>f</sup> | 1,4-dioxane        | K <sub>2</sub> CO <sub>3</sub>     | CSA/PPh <sub>3</sub>                                  | 58        |
| 20 <sup>g</sup> | 1,4-dioxane        | K <sub>2</sub> CO <sub>3</sub>     | CSA/PPh <sub>3</sub>                                  | 0         |
| 21              | 1,4-dioxane        | K <sub>2</sub> CO <sub>3</sub>     | –/PPh <sub>3</sub>                                    | 34        |
| 22              | 1,4-dioxane        | K <sub>2</sub> CO <sub>3</sub>     | CSA/–                                                 | 47        |

<sup>a</sup>Reaction conditions: a mixture of **1a** (0.2 mmol), **2a** (0.3 mmol), [RuCl<sub>2</sub>(*p*-cymene)]<sub>2</sub> (5 mol%, 10 mol% of Ru), ligand (30 mol%), base (0.4 mmol) and additive (10 mol%) in solvent (0.8 mL, used without dehydration) was stirred at 120 °C (oil bath, sealed tube) for 48 h. <sup>b</sup>Isolated yields. <sup>c</sup>Stirred at 80 °C. <sup>d</sup>Ru<sub>3</sub>(CO)<sub>12</sub> (3.3 mol%) instead of [RuCl<sub>2</sub>(*p*-cymene)]<sub>2</sub>. <sup>e</sup>RuCl<sub>3</sub>·3H<sub>2</sub>O (10 mol%) instead of [RuCl<sub>2</sub>(*p*-cymene)]<sub>2</sub>. <sup>f</sup>RuCl<sub>2</sub>(PPh<sub>3</sub>)<sub>3</sub> (10 mol%) instead of [RuCl<sub>2</sub>(*p*-cymene)]<sub>2</sub>. <sup>g</sup>No Ru catalyst.

#### 4. General experimental procedure

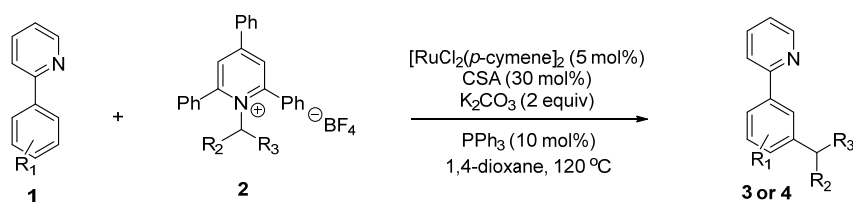

To a 10 mL Schlenk tube equipped with a magnetic stir bar was added [RuCl<sub>2</sub>(*p*-cymene)]<sub>2</sub> (6 mg, 0.01 mmol, 5 mol%), CSA (14 mg, 0.06 mmol, 30 mol%), K<sub>2</sub>CO<sub>3</sub> (28 mg, 0.4 mmol, 2.0 equiv), PPh<sub>3</sub> (5 mg, 0.02 mmol, 10 mol%) and the Katritzky salt (0.3 mmol, 1.5 equiv). The resulting mixture was sealed and degassed via vacuum evacuation and subsequent backfilled with nitrogen for three times. Next, **1** (0.2 mmol, 1.0 equiv) and 1,4-dioxane (0.8 mL, used without dehydration) were added. Then the resulting mixture was stirred at 120 °C (oil bath, sealed tube) for 48-72 h. The solvent was removed on a rotary evaporator under reduced pressure and the residue was purified by flash chromatography on silica gel with *n*-hexane/EtOAc to give the corresponding product.

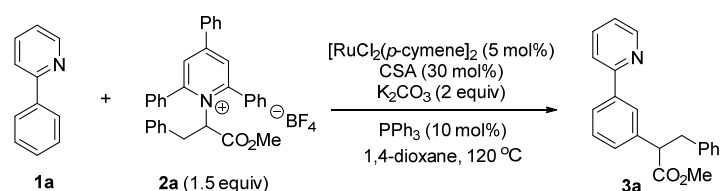

**Gram-scale reaction:** To a 50 mL Schlenk tube equipped with a magnetic stir bar was added  $[\text{RuCl}_2(p\text{-cymene})]_2$  (37 mg, 0.06 mmol, 5 mol%), CSA (83 mg, 0.36 mmol, 30 mol%),  $\text{K}_2\text{CO}_3$  (166 mg, 1.2 mmol, 1.0 equiv),  $\text{PPh}_3$  (32 mg, 0.12 mmol, 10 mol%) and **2a** (1.0 g, 1.8 mmol, 1.5 equiv). The resulting mixture was sealed and degassed via vacuum evacuation and subsequent backfill with nitrogen for three times. Next, **1a** (186 mg, 1.2 mmol, 1.0 equiv) and 1,4-dioxane (4.8 mL) were added. Then the resulting mixture was stirred at 120 °C (oil bath, sealed tube) for 72 h. The solvent was removed on a rotary evaporator under reduced pressure and the residue was purified by flash chromatography on silica gel with *n*-hexane/EtOAc to give 297 mg (78% yield) of **3a** as a yellow oil.

## 5. Mechanistic studies

### 5-1. Competitive experiments

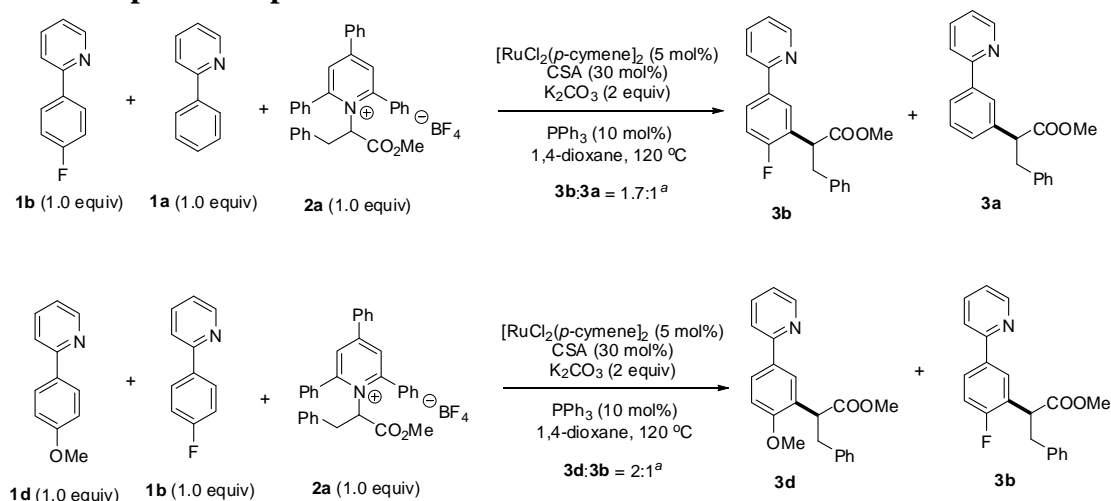

To a 10 mL Schlenk tube equipped with a magnetic stir bar was added  $[\text{RuCl}_2(p\text{-cymene})]_2$  (6 mg, 0.01 mmol, 5 mol%), CSA (14 mg, 0.06 mmol, 30 mol%),  $\text{K}_2\text{CO}_3$  (28 mg, 0.4 mmol, 2.0 equiv),  $\text{PPh}_3$  (5 mg, 0.02 mmol, 10 mol%), **2a** (111 mg, 0.2 mmol, 1.0 equiv), and **1** (**1b** and **1a** or **1d** and **1b**) (0.2 mmol, 1.0 equiv). The resulting mixture was sealed and degassed via vacuum evacuation and subsequent backfilled with nitrogen for three times. Next, 1,4-dioxane (0.8 mL, used without dehydration) was added. The resulting mixture was stirred at 120 °C (oil bath, sealed tube) for 72 h. The solvent was removed on a rotary evaporator under reduced pressure. The ratios were determined by the crude  $^1\text{H-NMR}$  spectra.

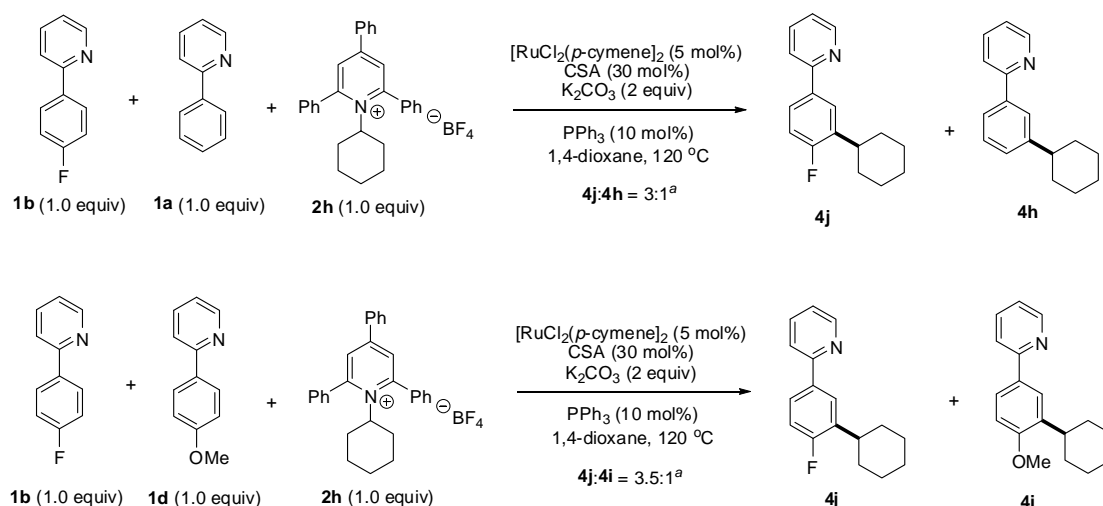

To a 10 mL Schlenk tube equipped with a magnetic stir bar was added [RuCl<sub>2</sub>(*p*-cymene)]<sub>2</sub> (6 mg, 0.01 mmol, 5 mol%), CSA (14 mg, 0.06 mmol, 30 mol%), K<sub>2</sub>CO<sub>3</sub> (28 mg, 0.4 mmol, 2.0 equiv), PPh<sub>3</sub> (5 mg, 0.02 mmol, 10 mol%), **2h** (95 mg, 0.2 mmol, 1.0 equiv), and **1** (**1b** and **1a** or **1d** and **1b**) (0.2 mmol, 1.0 equiv). The resulting mixture was sealed and degassed via vacuum evacuation and subsequent backfilled with nitrogen for three times. Next, 1,4-dioxane (0.8 mL, used without dehydration) was added. The resulting mixture was stirred at 120 °C (oil bath, sealed tube) for 72 h. The solvent was removed on a rotary evaporator under reduced pressure. The ratios were determined by the crude <sup>1</sup>H-NMR spectra.

## 5-2. Reaction with steric substrate

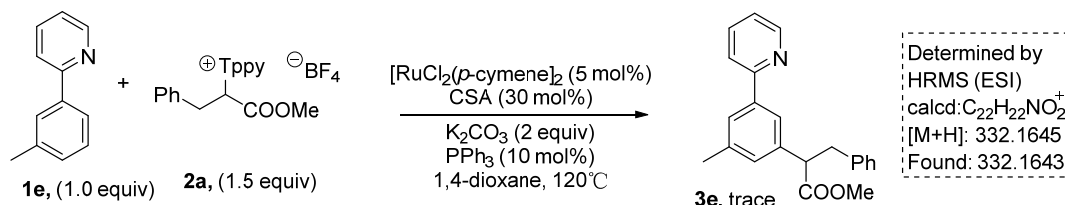

Perform the reaction according to the general experimental procedure with **1e** and **2a**, and the product **3e** was detected by TLC and determined by HRMS (ESI).

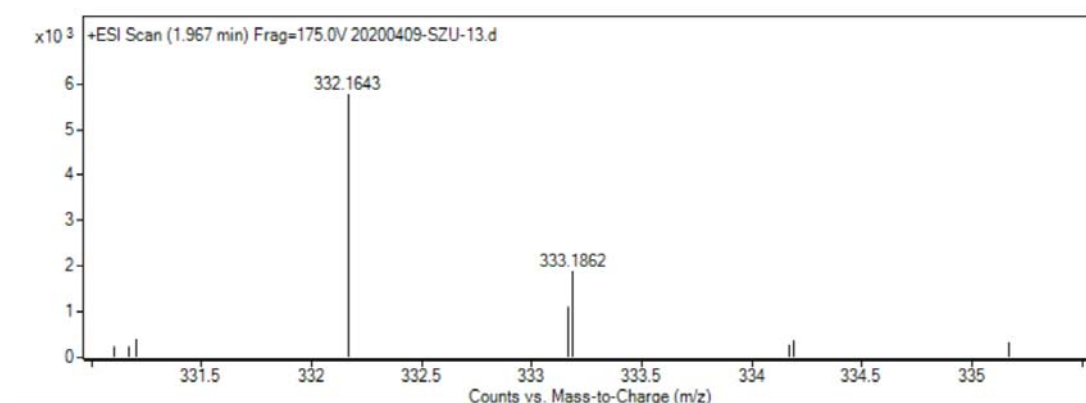

### 5-3. Reaction with well-defined Ru (II)-complex **5**

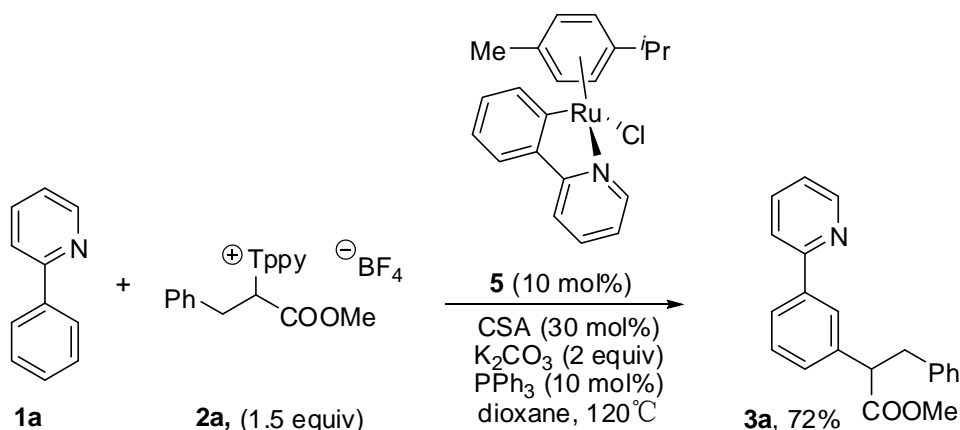

To a 10 mL Schlenk tube equipped with a magnetic stir bar was added ruthenium (II)-complex **5** (9 mg, 0.02 mmol, 10 mol%), CSA (14 mg, 0.06 mmol, 30 mol%), K<sub>2</sub>CO<sub>3</sub> (28 mg, 0.4 mmol, 2.0 equiv), PPh<sub>3</sub> (5 mg, 0.02 mmol, 10 mol%) and the Katritzky salt (167 mg, 0.3 mmol, 1.5 equiv). The resulting mixture was sealed and degassed via vacuum evacuation and subsequent backfilled with nitrogen for three times. Next, **1a** (31 mg, 0.2 mmol, 1.0 equiv) and 1,4-dioxane (0.8 mL, used without dehydration) were added. The resulting mixture was stirred at 120 °C (oil bath, sealed tube) for 60 h. The solvent was removed on a rotary evaporator under reduced pressure and the residue was purified by flash chromatography on silica gel with *n*-hexane/EtOAc to give 46 mg (72% yield) of **3a** as a yellow oil.

### 5-4. Control experiment

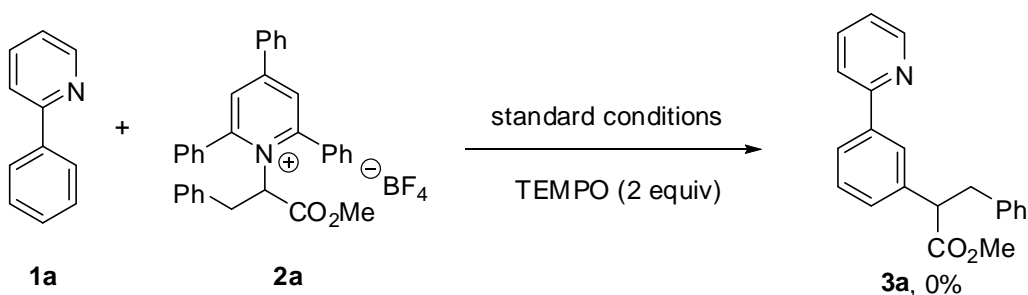

To a 10 mL Schlenk tube equipped with a magnetic stir bar was added [RuCl<sub>2</sub>(*p*-cymene)]<sub>2</sub> (6 mg, 0.01 mmol, 5 mol%), CSA (14 mg, 0.06 mmol, 30 mol%), K<sub>2</sub>CO<sub>3</sub> (28 mg, 0.4 mmol, 2.0 equiv), PPh<sub>3</sub> (5 mg, 0.02 mmol, 10 mol%) and the Katritzky salt (167 mg, 0.3 mmol, 1.5 equiv). The resulting mixture was sealed and degassed via vacuum evacuation and subsequent backfilled with nitrogen for three times. Next, **1a** (31 mg, 0.2 mmol, 1.0 equiv) and TEMPO (62 mg, 0.4 mmol) in 1,4-dioxane (0.8 mL, used without dehydration) were added. The resulting mixture was stirred at 120 °C (oil bath, sealed tube) for 60 h. We did not find the desired product **3a** in the reaction mixture.

## 6. Characterization of the substrates and products

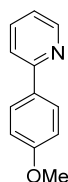

**2-(4-Methoxyphenyl)pyridine (1d):** Prepared via general procedure A; white solid;  $^1\text{H}$  NMR (400 MHz,  $\text{CDCl}_3$ )  $\delta$  8.65 (d,  $J = 4.0$  Hz, 1H), 7.95 (d,  $J = 8.6$  Hz, 2H), 7.76 – 7.63 (m, 2H), 7.20 – 7.13 (m, 1H), 7.00 (d,  $J = 8.6$  Hz, 2H), 3.87 (s, 3H);  $^{13}\text{C}$  NMR (150 MHz,  $\text{CDCl}_3$ )  $\delta$  160.5, 157.2, 149.6, 136.7, 132.1, 128.2, 121.5, 119.9, 114.2, 55.4.

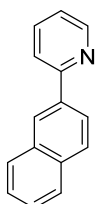

**2-(Naphthalen-2-yl)pyridine (1g):** Prepared via general procedure A; white solid;  $^1\text{H}$  NMR (400 MHz,  $\text{CDCl}_3$ )  $\delta$  8.76 (d,  $J = 2.6$  Hz, 1H), 8.50 (s, 1H), 8.15 (d,  $J = 8.4$  Hz, 1H), 7.96 (d,  $J = 7.5$  Hz, 2H), 7.92 – 7.84 (m, 2H), 7.83 – 7.73 (m, 1H), 7.57 – 7.48 (m, 2H), 7.30 – 7.23 (m, 1H);  $^{13}\text{C}$  NMR (150 MHz,  $\text{CDCl}_3$ )  $\delta$  157.4, 149.9, 136.9, 136.8, 133.7, 133.6, 128.8, 128.6, 127.8, 126.6, 126.4, 126.4, 124.7, 122.2, 120.9.

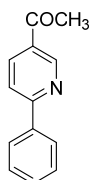

**1-(6-Phenylpyridin-3-yl)ethan-1-one (1i):** Prepared via general procedure A; Yellow oil;  $^1\text{H}$  NMR (400 MHz,  $\text{CDCl}_3$ )  $\delta$  9.23 (d,  $J = 1.7$  Hz, 1H), 8.29 (dd,  $J = 8.3, 2.3$  Hz, 1H), 8.08 – 8.02 (m, 2H), 7.84 (d,  $J = 8.3$  Hz, 1H), 7.53 – 7.43 (m, 3H), 2.66 (s, 3H);  $^{13}\text{C}$  NMR (150 MHz,  $\text{CDCl}_3$ )  $\delta$  196.6, 161.1, 150.2, 138.3, 136.5, 130.7, 130.2, 129.1, 127.5, 120.3, 26.9.

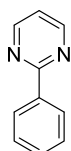

**2-Phenylpyrimidine (1k):** Prepared via general procedure A; Yellow oil;  $^1\text{H}$  NMR (600 MHz,  $\text{CDCl}_3$ )  $\delta$  8.79 (d,  $J = 4.8$  Hz, 2H), 8.47 – 8.42 (m, 2H), 7.52 – 7.46 (m, 3H), 7.16 (t,  $J = 4.8$  Hz, 1H);  $^{13}\text{C}$  NMR (150 MHz,  $\text{CDCl}_3$ )  $\delta$  164.9, 157.3, 137.7, 130.9, 128.7, 128.2, 119.2.

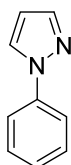

**1-Phenyl-1H-pyrazole (1l):** Prepared via general procedure B; Yellow oil;  $^1\text{H}$  NMR (400 MHz,  $\text{CDCl}_3$ )  $\delta$  7.92 (s, 1H), 7.77 – 7.64 (m, 3H), 7.45 (t,  $J$  = 7.3 Hz, 2H), 7.28 (t,  $J$  = 7.9 Hz, 1H), 6.46 (s, 1H);  $^{13}\text{C}$  NMR (150 MHz,  $\text{CDCl}_3$ )  $\delta$  141.2, 140.3, 129.5, 126.8, 126.5, 119.3, 107.7.

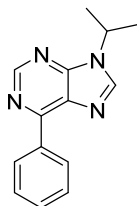

**9-Isopropyl-6-phenyl-9H-purine (1m):** Prepared via general procedure A; Yellow oil;  $^1\text{H}$  NMR (400 MHz,  $\text{CDCl}_3$ )  $\delta$  9.01 (s, 1H), 8.79 – 8.75 (m, 2H), 8.17 (s, 1H), 7.58 – 7.48 (m, 3H), 5.03 – 4.91 (m, 1H), 1.66 (d,  $J$  = 6.8 Hz, 6H);  $^{13}\text{C}$  NMR (100 MHz,  $\text{CDCl}_3$ )  $\delta$  154.9, 152.2, 142.1, 135.9, 131.6, 131.0, 129.9, 128.8, 47.4, 22.7.

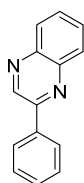

**2-Phenylquinoxaline (1n):** Prepared via general procedure A; Yellow oil;  $^1\text{H}$  NMR (600 MHz,  $\text{CDCl}_3$ )  $\delta$  9.32 (s, 1H), 8.19 (d,  $J$  = 7.3 Hz, 2H), 8.15 (d,  $J$  = 7.9 Hz, 1H), 8.12 (d,  $J$  = 8.4 Hz, 1H), 7.79 – 7.70 (m, 2H), 7.56 (t,  $J$  = 7.4 Hz, 2H), 7.51 (t,  $J$  = 7.3 Hz, 1H);  $^{13}\text{C}$  NMR (150 MHz,  $\text{CDCl}_3$ )  $\delta$  151.9, 143.4, 142.4, 141.7, 136.9, 130.4, 130.3, 129.7, 129.6, 129.2, 127.6.

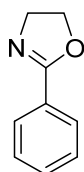

**2-Phenyl-4,5-dihydrooxazole (1o):** Prepared via general procedure D; Yellow oil;  $^1\text{H}$  NMR (600 MHz,  $\text{CDCl}_3$ )  $\delta$  7.95 – 7.90 (m, 2H), 7.44 (t,  $J$  = 7.4 Hz, 1H), 7.38 (t,  $J$  = 7.6 Hz, 2H), 4.38 (t,  $J$  = 9.5 Hz, 2H), 4.02 (t,  $J$  = 9.5 Hz, 2H);  $^{13}\text{C}$  NMR (150 MHz,  $\text{CDCl}_3$ )  $\delta$  164.7, 131.3, 128.3, 128.2, 127.8, 67.6, 55.0.

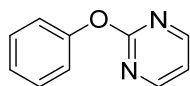

**2-Phenoxypyrimidine (1p):** Prepared via general procedure C; white solid;  $^1\text{H}$  NMR (400 MHz,  $\text{CDCl}_3$ )  $\delta$  8.57 (d,  $J = 4.3$  Hz, 2H), 7.45 (t,  $J = 7.4$  Hz, 2H), 7.29 (d,  $J = 7.1$  Hz, 1H), 7.22 (d,  $J = 7.8$  Hz, 2H), 7.04 (t,  $J = 4.2$  Hz, 1H);  $^{13}\text{C}$  NMR (150 MHz,  $\text{CDCl}_3$ )  $\delta$  165.5, 159.8, 153.0, 129.7, 125.6, 121.8, 116.3.

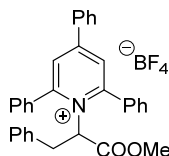

**(1-Methoxy-1-oxo-3-phenylpropan-2-yl)-2,4,6-triphenylpyridin-1-ium tetrafluoroborate (2a):** Prepared via general procedure E; white solid;  $^1\text{H}$  NMR (600 MHz,  $\text{CDCl}_3$ )  $\delta$  7.93 (s, 2H), 7.86 – 7.69 (m, 4H), 7.60 (t,  $J = 7.2$  Hz, 2H), 7.57 – 7.40 (m, 9H), 7.14 – 7.05 (m, 3H), 6.77 (d,  $J = 7.3$  Hz, 2H), 5.64 (dd,  $J = 7.5, 3.7$  Hz, 1H), 3.69 (s, 3H), 3.49 – 3.42 (m, 1H), 2.93 (dd,  $J = 14.4, 8.0$  Hz, 1H);  $^{13}\text{C}$  NMR (150 MHz,  $\text{CDCl}_3$ )  $\delta$  168.0, 157.1, 157.0, 136.4, 133.8, 132.5, 132.4, 131.7, 129.8, 129.6, 129.2, 129.1, 128.72, 128.66, 128.0, 127.3, 70.3, 53.9, 37.8;  $^{19}\text{F}$  NMR (564 MHz,  $\text{CDCl}_3$ )  $\delta$  -152.80 (d,  $J = 4.5$  Hz), -152.86 (d,  $J = 3.5$  Hz).

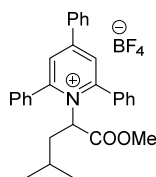

**(1-Methoxy-4-methyl-1-oxopentan-2-yl)-2,4,6-triphenylpyridin-1-ium tetrafluoroborate (2b):** Prepared via general procedure E; white solid;  $^1\text{H}$  NMR (400 MHz,  $\text{CDCl}_3$ )  $\delta$  7.89 (s, 2H), 7.80 (d,  $J = 7.3$  Hz, 2H), 7.70 (br, 2H), 7.62 – 7.52 (m, 7H), 7.51 – 7.45 (m, 2H), 5.46 (dd,  $J = 7.8, 2.8$  Hz, 1H), 3.74 (s, 3H), 1.76 – 1.64 (m, 1H), 1.62 – 1.50 (m, 1H), 1.35 – 1.24 (m, 1H), 0.56 (d,  $J = 6.5$  Hz, 3H), 0.41 (d,  $J = 6.4$  Hz, 3H);  $^{13}\text{C}$  NMR (150 MHz,  $\text{CDCl}_3$ )  $\delta$  168.7, 156.8, 156.7, 133.7, 132.5, 132.3, 131.6, 129.6, 129.4, 129.1, 128.5, 127.9, 67.4, 53.9, 40.4, 26.1, 22.3, 20.7.  $^{19}\text{F}$  NMR (564 MHz,  $\text{CDCl}_3$ )  $\delta$  -153.01 (s), -153.07 (s).

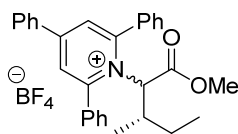

**(1-Methoxy-3-methyl-1-oxopentan-2-yl)-2,4,6-triphenylpyridin-1-ium tetrafluoroborate (2c):** Prepared via general procedure E; white solid; Two isomers, *d.r.*: 1.1:1;  $^1\text{H}$  NMR (600 MHz,  $\text{CDCl}_3$ )  $\delta$  8.00 (s, 2H), 7.93 – 7.87 (m, 2H), 7.68 (s, 1H), 7.65 – 7.58 (m, 7H), 7.56 – 7.46 (m, 5H), 5.32 (d,  $J = 10.2$  Hz, 0.5H)/5.18 (d,  $J = 10.2$  Hz, 0.6H), 3.77 (s, 1.6H)/3.74 (s, 1.3H), 2.02 – 1.93 (m, 0.6H)/1.75 – 1.66 (m, 0.9H), 1.41 – 1.34 (m, 0.6H)/1.01 – 0.91 (m, 0.9H), 1.30 – 1.18 (m, 1.6H)/0.50 – 0.43 (m, 1.3H), 0.84 (t, 2.3H)/0.70 (t,  $J = 7.6$  Hz, 3H), 0.82 – 0.75 (m, 1H);  $^{13}\text{C}$  NMR (150 MHz,  $\text{CDCl}_3$ )  $\delta$  167.0, 166.8, 157.10, 157.06, 133.1, 133.0, 131.9, 129.9, 129.8, 129.7,

129.4, 129.2, 128.9, 128.8, 128.6, 127.8, 73.5, 71.3, 53.93, 53.87, 36.0, 35.6, 27.8, 25.4, 18.5, 15.2, 11.1, 9.5;  $^{19}\text{F}$  NMR (564 MHz,  $\text{CDCl}_3$ )  $\delta$  -153.28 (s), -153.34 (s); HRMS (ESI) calcd  $\text{C}_{30}\text{H}_{30}\text{NO}_2$   $[\text{M-BF}_4]^+$ : 436.2271, found: 436.2270.

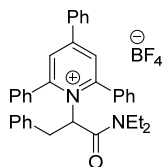

**1-(1-(Diethylamino)-1-oxo-3-phenylpropan-2-yl)-2,4,6-triphenylpyridin-1-iumtetrafluoroborate (2d):** Prepared via general procedure E; white solid;  $^1\text{H}$  NMR (600 MHz,  $\text{CDCl}_3$ )  $\delta$  8.04 (br, 2H), 7.85 (s, 2H), 7.76 (d,  $J = 7.7$  Hz, 2H), 7.74 – 7.49 (m, 9H), 7.46 (t,  $J = 7.6$  Hz, 2H), 7.16 – 7.07 (m, 3H), 6.87 (d,  $J = 7.5$  Hz, 2H), 5.96 (dd,  $J = 9.5, 3.4$  Hz, 1H), 3.53 (dd,  $J = 14.3, 3.2$  Hz, 1H), 3.23 – 3.04 (m, 2H), 2.96 – 2.85 (m, 1H), 2.26 – 2.10 (m, 2H), 0.98 (t,  $J = 6.2$  Hz, 3H), 0.37 (t,  $J = 6.3$  Hz, 3H);  $^{13}\text{C}$  NMR (150 MHz,  $\text{CDCl}_3$ )  $\delta$  165.2, 157.7, 155.8, 145.8, 135.8, 133.9, 133.6, 132.4, 131.2, 129.9, 129.7, 129.0, 128.93, 128.87, 128.5, 128.4, 127.4, 70.9, 41.3, 40.6, 39.1, 12.8, 12.2;  $^{19}\text{F}$  NMR (564 MHz,  $\text{CDCl}_3$ )  $\delta$  -152.75 (s), -152.80 (s); HRMS (ESI) calcd  $\text{C}_{36}\text{H}_{35}\text{N}_2\text{O}$   $[\text{M-BF}_4]^+$ : 511.2744, found: 511.2743.

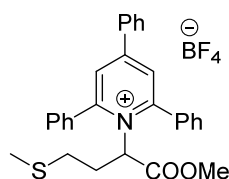

**(1-Methoxy-4-(methylthio)-1-oxobutan-2-yl)-2,4,6-triphenylpyridin-1-iumtetrafluoroborate (2e):** Prepared via general procedure E; white solid;  $^1\text{H}$  NMR (400 MHz,  $\text{CDCl}_3$ )  $\delta$  7.87 (s, 2H), 7.74 (dd,  $J = 31.7, 8.1$  Hz, 4H), 7.63 – 7.50 (m, 7H), 7.46 (t,  $J = 7.3$  Hz, 2H), 5.92 (dd,  $J = 7.7$  Hz, 1H), 3.73 (s, 3H), 2.37 – 2.16 (m, 3H), 1.95 – 1.85 (m, 1H), 1.84 (s, 3H);  $^{13}\text{C}$  NMR (150 MHz,  $\text{CDCl}_3$ )  $\delta$  168.4, 156.9, 133.8, 132.5, 132.2, 131.5, 129.6, 129.1, 128.5, 66.7, 53.9, 31.4, 30.8, 14.7;  $^{19}\text{F}$  NMR (564 MHz,  $\text{CDCl}_3$ )  $\delta$  -152.74 (s), -152.79 (s).

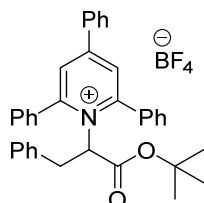

**(1-(tert-Butoxy)-1-oxo-3-phenylpropan-2-yl)-2,4,6-triphenylpyridin-1-iumtetrafluoroborate (2f):** Prepared via general procedure E; white solid;  $^1\text{H}$  NMR (600 MHz,  $\text{CDCl}_3$ )  $\delta$  7.95 (d,  $J = 2.9$  Hz, 2H), 7.88 – 7.78 (m, 3H), 7.79 – 7.44 (m, 12H), 7.07 (dd,  $J = 9.3, 5.7$  Hz, 3H), 6.83 – 6.76 (m, 2H), 5.55 (dd,  $J = 8.3, 2.8$  Hz, 1H), 3.45 – 3.39 (m, 1H), 2.48 – 2.41 (m, 1H), 1.35 (s, 9H);  $^{13}\text{C}$  NMR (150 MHz,  $\text{CDCl}_3$ )  $\delta$  167.84, 167.80, 156.8, 146.0, 137.3, 137.2, 134.0, 133.0, 132.4, 131.5, 129.8, 128.9,

128.6, 128.5, 127.0, 85.6, 72.0, 37.8, 27.8;  $^{19}\text{F}$  NMR (564 MHz,  $\text{CDCl}_3$ )  $\delta$  -152.65 (s), -152.70 (s); HRMS (ESI) calcd  $\text{C}_{36}\text{H}_{34}\text{NO}_2$   $[\text{M-BF}_4]^+$ : 512.2584, found: 512.2586.

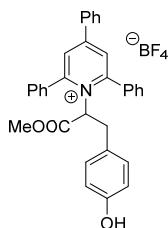

**1-(3-(4-Hydroxyphenyl)-1-methoxy-1-oxopropan-2-yl)-2,4,6-triphenylpyridin-1-ium tetrafluoroborate (2g):** Prepared via general procedure E; white solid;  $^1\text{H}$  NMR (600 MHz,  $\text{CDCl}_3$ )  $\delta$  7.92 (s, 2H), 7.86 – 7.83 (m, 2H), 7.79 – 7.46 (m, 13H), 6.62 (d,  $J$  = 8.5 Hz, 2H), 6.44 (d,  $J$  = 8.4 Hz, 2H), 5.60 (t,  $J$  = 6.7 Hz, 1H), 3.70 (s, 3H), 3.15 (dd,  $J$  = 14.8, 7.1 Hz, 1H), 2.89 (dd,  $J$  = 14.8, 6.4 Hz, 1H);  $^{13}\text{C}$  NMR (150 MHz,  $\text{CDCl}_3$ )  $\delta$  168.2, 157.1, 156.3, 132.9, 132.2, 131.9, 130.0, 129.8, 129.4, 128.7, 116.3, 70.9, 53.9, 36.7;  $^{19}\text{F}$  NMR (564 MHz,  $\text{CDCl}_3$ )  $\delta$  -151.85 (s), -151.90 (s); HRMS (ESI) calcd  $\text{C}_{33}\text{H}_{28}\text{NO}_3$   $[\text{M-BF}_4]^+$ : 486.2064, found: 486.2062.

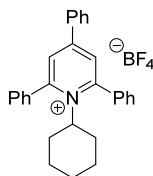

**1-Cyclohexyl-2,4,6-triphenylpyridin-1-ium tetrafluoroborate (2h):** Prepared via general procedure E; white solid;  $^1\text{H}$  NMR (600 MHz,  $\text{CDCl}_3$ )  $\delta$  7.76 (s, 2H), 7.71 (t,  $J$  = 6.8 Hz, 6H), 7.63 – 7.52 (m, 6H), 7.49 (t,  $J$  = 7.4 Hz, 1H), 7.43 (t,  $J$  = 7.6 Hz, 2H), 4.64 – 4.55 (m, 1H), 2.15 – 2.05 (m, 2H), 1.61 – 1.52 (m, 2H), 1.52 – 1.40 (m, 2H), 1.37 – 1.30 (m, 1H), 0.78 – 0.67 (m, 2H), 0.65 – 0.54 (m, 1H);  $^{13}\text{C}$  NMR (150 MHz,  $\text{CDCl}_3$ )  $\delta$  157.2, 155.1, 134.12, 134.09, 131.9, 130.9, 129.6, 129.4, 128.9, 128.4, 128.2, 72.0, 33.7, 26.6, 24.7;  $^{19}\text{F}$  NMR (564 MHz,  $\text{CDCl}_3$ )  $\delta$  -153.30 (s), -153.36 (s).

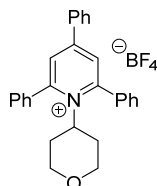

**2,4,6-Triphenyl-1-(tetrahydro-2H-pyran-4-yl)pyridin-1-ium tetrafluoroborate (2i):** Prepared via general procedure E; yellowish solid;  $^1\text{H}$  NMR (400 MHz,  $\text{CDCl}_3$ )  $\delta$  7.79 – 7.70 (m, 6H), 7.69 – 7.64 (m, 2H), 7.63 – 7.53 (m, 6H), 7.50 (t,  $J$  = 7.4 Hz, 1H), 7.41 (t,  $J$  = 7.5 Hz, 2H), 4.94 – 4.80 (m, 1H), 3.76 – 3.65 (m, 2H), 2.78 (t,  $J$  = 11.2 Hz, 2H), 2.05 (d,  $J$  = 11.9 Hz, 2H), 1.92 – 1.78 (m, 2H);  $^{13}\text{C}$  NMR (600 MHz,  $\text{CDCl}_3$ )  $\delta$  157.3, 155.3, 134.1, 133.9, 132.1, 131.2, 129.7, 129.4, 129.1, 128.4, 128.3, 69.2, 67.9, 33.9;  $^{19}\text{F}$  NMR (376 MHz,  $\text{CDCl}_3$ )  $\delta$  -152.86 (s), -152.92 (s);

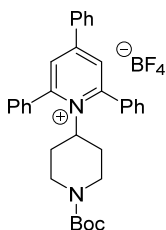

**1-(1-(*tert*-Butoxycarbonyl)piperidin-4-yl)-2,4,6-triphenylpyridin-1-ium**

**tetrafluoroborate (2j):** Prepared via general procedure E; white solid;  $^1\text{H}$  NMR (600 MHz,  $\text{CDCl}_3$ )  $\delta$  7.80 – 7.65 (m, 8H), 7.63 – 7.53 (m, 6H), 7.53 – 7.48 (m, 1H), 7.47 – 7.39 (m, 2H), 4.76 (t,  $J$  = 12.0 Hz, 1H), 4.02 – 3.79 (m, 2H), 2.27 – 2.00 (m, 4H), 1.72 – 1.55 (m, 2H), 1.30 (s, 9H);  $^{13}\text{C}$  NMR (150 MHz,  $\text{CDCl}_3$ )  $\delta$  157.2, 155.5, 154.3, 134.1, 133.9, 132.1, 131.2, 129.7, 129.4, 129.1, 128.4, 80.2, 70.0, 44.7, 43.8, 32.8, 28.4;  $^{19}\text{F}$  NMR (564 MHz,  $\text{CDCl}_3$ )  $\delta$  -152.96 (s), -153.01 (s).

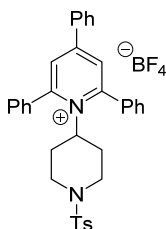

**2,4,6-Triphenyl-1-(1-tosylpiperidin-4-yl)pyridin-1-ium tetrafluoroborate (2k) :**

Prepared via general procedure E; white solid;  $^1\text{H}$  NMR (400 MHz,  $\text{CDCl}_3$ )  $\delta$  7.73 (s, 2H), 7.71 – 7.64 (m, 6H), 7.61 – 7.48 (m, 7H), 7.45 – 7.36 (m, 4H), 7.22 (d,  $J$  = 8.0 Hz, 2H), 4.58 – 4.47 (m, 1H), 3.63 – 3.54 (m, 2H), 2.40 (s, 3H), 2.25 – 2.16 (m, 2H), 1.85 – 1.70 (m, 4H);  $^{13}\text{C}$  NMR (150 MHz,  $\text{CDCl}_3$ )  $\delta$  157.3, 155.5, 143.9, 133.9, 133.7, 133.2, 132.2, 131.2, 129.8, 129.7, 129.3, 129.2, 128.4, 128.3, 127.5, 69.1, 46.4, 32.3, 21.7;  $^{19}\text{F}$  NMR (564 MHz,  $\text{CDCl}_3$ )  $\delta$  -152.88 (s), -152.93 (s).

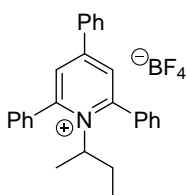

**1-(*sec*-Butyl)-2,4,6-triphenylpyridin-1-ium tetrafluoroborate (2l):** Prepared via general procedure E; white solid;  $^1\text{H}$  NMR (600 MHz,  $\text{CDCl}_3$ )  $\delta$  7.81 (s, 2H), 7.76 – 7.66 (m, 6H), 7.61 – 7.55 (m, 6H), 7.53 – 7.50 (m, 1H), 7.49 – 7.44 (m, 2H), 4.85 – 4.77 (m, 1H), 1.92 – 1.81 (m, 1H), 1.51 – 1.43 (m, 1H), 1.40 (d,  $J$  = 7.0 Hz, 3H), 0.62 (t,  $J$  = 7.4 Hz, 3H);  $^{13}\text{C}$  NMR (150 MHz,  $\text{CDCl}_3$ )  $\delta$  157.4, 155.3, 134.1, 134.0, 132.1, 131.0, 129.7, 129.4, 129.0, 128.4, 68.7, 30.2, 21.4, 11.3;  $^{19}\text{F}$  NMR (564 MHz,  $\text{CDCl}_3$ )  $\delta$  -153.32 (s), -153.37 (s).

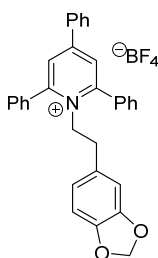

**1-(2-(Benzo[d][1,3]dioxol-5-yl)ethyl)-2,4,6-triphenylpyridin-1-ium**

**tetrafluoroborate (2m):** Prepared via general procedure E; white solid;  $^1\text{H}$  NMR (600 MHz,  $\text{CDCl}_3$ )  $\delta$  7.87 (s, 2H), 7.83 – 7.72 (m, 6H), 7.67 – 7.59 (m, 6H), 7.58 – 7.45 (m, 3H), 6.47 (d,  $J$  = 7.8 Hz, 1H), 5.84 (s, 2H), 5.74 (d,  $J$  = 7.7 Hz, 1H), 5.66 (s, 1H), 4.60 – 4.50 (m, 2H), 2.65 – 2.56 (m, 2H);  $^{13}\text{C}$  NMR (150 MHz,  $\text{CDCl}_3$ )  $\delta$  156.6, 156.1, 147.9, 146.8, 134.2, 132.9, 132.2, 131.3, 129.8, 129.5, 129.2, 128.9, 128.3, 126.8, 121.4, 108.6, 108.5, 101.1, 56.1, 35.5;  $^{19}\text{F}$  NMR (564 MHz,  $\text{CDCl}_3$ )  $\delta$  -153.12 (s), -153.17 (s).

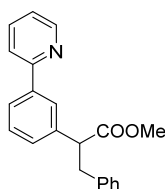

**Methyl 3-phenyl-2-(3-(pyridin-2-yl)phenyl)propanoate (3a):** 91% (58 mg); Yellow oil;  $^1\text{H}$  NMR (600 MHz,  $\text{CDCl}_3$ )  $\delta$  8.71 (d,  $J$  = 4.8 Hz, 1H), 7.96 (s, 1H), 7.89 (d,  $J$  = 7.6 Hz, 1H), 7.77 – 7.73 (m, 1H), 7.70 (d,  $J$  = 7.8 Hz, 1H), 7.43 (t,  $J$  = 7.6 Hz, 1H), 7.40 (d,  $J$  = 7.7 Hz, 1H), 7.27 – 7.23 (m, 3H), 7.21 – 7.14 (m, 3H), 3.98 (dd,  $J$  = 9.0, 6.5 Hz, 1H), 3.61 (s, 3H), 3.49 (dd,  $J$  = 13.8, 9.1 Hz, 1H), 3.10 (dd,  $J$  = 13.8, 6.4 Hz, 1H);  $^{13}\text{C}$  NMR (150 MHz,  $\text{CDCl}_3$ )  $\delta$  173.9, 157.3, 149.8, 139.9, 139.3, 139.1, 136.9, 129.2, 129.1, 128.6, 128.5, 126.8, 126.5, 126.2, 122.3, 120.8, 53.8, 52.1, 40.0; FT-IR (thin film, KBr):  $\nu$  ( $\text{cm}^{-1}$ ) 2948, 1732, 1588, 1206, 696; HRMS (ESI) calcd  $\text{C}_{21}\text{H}_{20}\text{NO}_2$   $[\text{M} + \text{H}]^+$ : 318.1489, found: 318.1488.

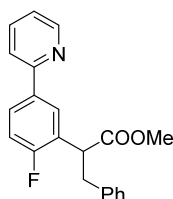

**Methyl 2-(2-fluoro-5-(pyridin-2-yl)phenyl)-3-phenylpropanoate (3b):** 90% (60 mg); Yellow oil;  $^1\text{H}$  NMR (400 MHz,  $\text{CDCl}_3$ )  $\delta$  8.69 – 8.66 (m, 1H), 7.98 (dd,  $J$  = 7.0, 2.3 Hz, 1H), 7.92 – 7.86 (m, 1H), 7.76 – 7.71 (m, 1H), 7.66 – 7.62 (m, 1H), 7.26 – 7.20 (m, 3H), 7.20 – 7.08 (m, 4H), 4.29 (dd,  $J$  = 8.1, 7.3 Hz, 1H), 3.64 (s, 3H), 3.50 (dd,  $J$  = 13.8, 8.3 Hz, 1H), 3.10 (dd,  $J$  = 13.7, 7.2 Hz, 1H);  $^{13}\text{C}$  NMR (150 MHz,  $\text{CDCl}_3$ )  $\delta$  173.2, 161.2 (d,  $J$  = 249.1 Hz), 156.4, 149.8, 138.8, 136.9, 135.9 (d,  $J$  = 2.8 Hz), 129.1, 128.5, 128.0 (d,  $J$  = 3.8 Hz), 127.8 (d,  $J$  = 8.6 Hz), 126.6, 126.2 (d,  $J$  = 15.3 Hz), 122.2, 120.5, 116.0 (d,  $J$  = 23.1 Hz), 52.3, 46.0, 38.9;  $^{19}\text{F}$  NMR (377 MHz,

CDCl<sub>3</sub>)  $\delta$  -117.97 – -118.02 (m, 1F); FT-IR (thin film, KBr):  $\nu$  (cm<sup>-1</sup>) 2956, 1732, 1503, 1214, 700; HRMS (ESI) calcd C<sub>21</sub>H<sub>19</sub>FNO<sub>2</sub> [M + H]<sup>+</sup>: 336.1394, found: 336.1399.

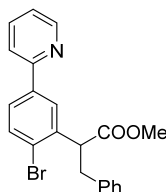

**Methyl 2-(2-bromo-5-(pyridin-2-yl)phenyl)-3-phenylpropanoate (3c):** 82% (65 mg); Yellow oil; <sup>1</sup>H NMR (600 MHz, CDCl<sub>3</sub>)  $\delta$  8.76 – 8.73 (m, 1H), 8.09 (d, *J* = 1.9 Hz, 1H), 7.84 – 7.77 (m, 2H), 7.74 – 7.68 (m, 2H), 7.31 – 7.26 (m, 5H), 7.25 – 7.21 (m, 1H), 4.58 (dd, *J* = 9.1, 6.0 Hz, 1H), 3.67 (s, 3H), 3.47 (dd, *J* = 13.8, 9.1 Hz, 1H), 3.14 (dd, *J* = 13.8, 6.0 Hz, 1H); <sup>13</sup>C NMR (150 MHz, CDCl<sub>3</sub>)  $\delta$  173.3, 156.2, 149.9, 139.2, 138.8, 138.6, 137.0, 133.6, 129.2, 128.5, 127.4, 127.3, 126.6, 125.7, 122.7, 120.6, 52.3, 52.2, 39.5; FT-IR (thin film, KBr):  $\nu$  (cm<sup>-1</sup>) 2921, 1732, 1584, 1214, 704; HRMS (ESI) calcd C<sub>21</sub>H<sub>19</sub><sup>79</sup>BrNO<sub>2</sub> [M + H]<sup>+</sup>: 396.0594, found: 396.0591.

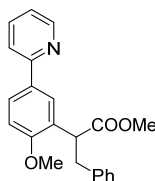

**Methyl 2-(2-methoxy-5-(pyridin-2-yl)phenyl)-3-phenylpropanoate (3d):** 97% (67 mg); Yellow oil; <sup>1</sup>H NMR (400 MHz, CDCl<sub>3</sub>)  $\delta$  8.66 – 8.64 (m, 1H), 7.92 (dd, *J* = 8.6, 2.3 Hz, 1H), 7.87 (d, *J* = 2.3 Hz, 1H), 7.74 – 7.68 (m, 1H), 7.66 – 7.60 (m, 1H), 7.24 – 7.19 (m, 2H), 7.19 – 7.12 (m, 4H), 6.94 (d, *J* = 8.6 Hz, 1H), 4.38 (dd, *J* = 8.4, 6.8 Hz, 1H), 3.80 (s, 3H), 3.62 (s, 3H), 3.43 (dd, *J* = 13.6, 8.4 Hz, 1H), 3.04 (dd, *J* = 13.6, 6.7 Hz, 1H); <sup>13</sup>C NMR (150 MHz, CDCl<sub>3</sub>)  $\delta$  174.2, 157.7, 157.1, 149.6, 139.7, 136.7, 132.1, 129.2, 128.2, 127.9, 127.19, 127.16, 126.3, 121.6, 120.1, 111.1, 55.9, 52.0, 46.5, 39.0; FT-IR (thin film, KBr):  $\nu$  (cm<sup>-1</sup>) 2921, 1736, 1463, 1253, 696; HRMS (ESI) calcd C<sub>22</sub>H<sub>22</sub>NO<sub>3</sub> [M + H]<sup>+</sup>: 348.1594, found: 348.1603.

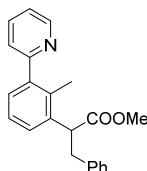

**Methyl 2-(2-methyl-3-(pyridin-2-yl)phenyl)-3-phenylpropanoate (3f):** 38% (25 mg); Yellow oil; <sup>1</sup>H NMR (600 MHz, CDCl<sub>3</sub>)  $\delta$  8.73 – 8.69 (m, 1H), 7.76 (td, *J* = 7.7, 1.6 Hz, 1H), 7.51 (d, *J* = 7.5 Hz, 1H), 7.35 – 7.30 (m, 2H), 7.29 – 7.26 (m, 4H), 7.23 – 7.17 (m, 3H), 4.26 (dd, *J* = 9.0, 5.9 Hz, 1H), 3.63 (s, 3H), 3.49 (dd, *J* = 13.8, 9.1 Hz, 1H), 3.01 (dd, *J* = 13.8, 5.9 Hz, 1H), 2.22 (s, 3H); <sup>13</sup>C NMR (150 MHz, CDCl<sub>3</sub>)  $\delta$  174.3, 160.8, 149.3, 141.8, 139.5, 138.5, 136.3, 133.9, 129.1, 128.9, 128.5, 127.1,

126.5, 126.2, 124.6, 121.8, 52.1, 49.2, 39.8, 16.5; FT-IR (thin film, KBr):  $\nu$  (cm<sup>-1</sup>) 2948, 1736, 1580, 1210, 700; HRMS (ESI) calcd C<sub>22</sub>H<sub>21</sub>NO<sub>2</sub>Na [M + Na]<sup>+</sup>: 354.1465, found: 354.1460.

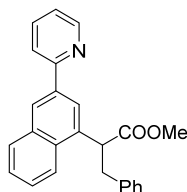

**Methyl 3-phenyl-2-(3-(pyridin-2-yl)naphthalen-1-yl)propanoate (3g):** 44% (32 mg), Yellow oil; <sup>1</sup>H NMR (600 MHz, CDCl<sub>3</sub>)  $\delta$  8.79 – 8.75 (m, 1H), 8.46 (s, 1H), 8.24 (s, 1H), 8.16 (d, *J* = 8.3 Hz, 1H), 8.00 (d, *J* = 7.9 Hz, 1H), 7.87 (d, *J* = 7.9 Hz, 1H), 7.83 – 7.79 (m, 1H), 7.59 – 7.51 (m, 2H), 7.30 – 7.24 (m, 5H), 7.22 – 7.18 (m, 1H), 4.75 (dd, *J* = 9.5, 5.4 Hz, 1H), 3.73 (dd, *J* = 13.8, 9.6 Hz, 1H), 3.61 (s, 3H), 3.24 (dd, *J* = 13.8, 5.3 Hz, 1H); <sup>13</sup>C NMR (150 MHz, CDCl<sub>3</sub>)  $\delta$  174.2, 157.1, 150.0, 139.6, 136.9, 136.4, 135.8, 134.4, 131.7, 130.0, 129.1, 128.6, 127.2, 126.6, 126.5, 126.3, 124.0, 123.1, 122.4, 121.0, 52.3, 49.3, 39.6; FT-IR (thin film, KBr):  $\nu$  (cm<sup>-1</sup>) 2921, 1731, 1586, 1205, 698; HRMS (ESI) calcd C<sub>25</sub>H<sub>21</sub>NO<sub>2</sub>Na [M + Na]<sup>+</sup>: 390.1465, found: 390.1455.

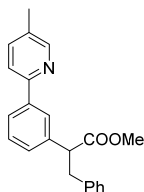

**Methyl 2-(3-(5-methylpyridin-2-yl)phenyl)-3-phenylpropanoate (3h):** 56% (37 mg), Yellow oil; <sup>1</sup>H NMR (600 MHz, CDCl<sub>3</sub>)  $\delta$  8.52 (s, 1H), 7.92 (s, 1H), 7.86 (d, *J* = 7.6 Hz, 1H), 7.60 (d, *J* = 8.0 Hz, 1H), 7.58 – 7.52 (m, 1H), 7.41 (t, *J* = 7.6 Hz, 1H), 7.37 (d, *J* = 7.7 Hz, 1H), 7.26 – 7.22 (m, 2H), 7.20 – 7.14 (m, 3H), 3.96 (dd, *J* = 9.1, 6.4 Hz, 1H), 3.60 (s, 3H), 3.48 (dd, *J* = 13.8, 9.2 Hz, 1H), 3.09 (dd, *J* = 13.8, 6.3 Hz, 1H), 2.38 (s, 3H); <sup>13</sup>C NMR (150 MHz, CDCl<sub>3</sub>)  $\delta$  173.9, 154.6, 150.2, 140.0, 139.3, 139.2, 137.4, 131.9, 129.2, 129.1, 128.5, 128.2, 126.6, 126.5, 126.0, 120.3, 53.8, 52.2, 40.0, 18.3; FT-IR (thin film, KBr):  $\nu$  (cm<sup>-1</sup>) 2952, 1729, 1561, 1210, 700; HRMS (ESI) calcd C<sub>22</sub>H<sub>22</sub>NO<sub>2</sub> [M + H]<sup>+</sup>: 332.1645, found: 332.1652.

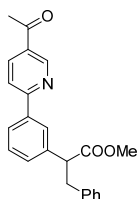

**Methyl 2-(3-(5-acetylpyridin-2-yl)phenyl)-3-phenylpropanoate (3i):** 50% (36 mg), Yellow oil; <sup>1</sup>H NMR (400 MHz, CDCl<sub>3</sub>)  $\delta$  9.23 (dd, *J* = 2.3, 0.7 Hz, 1H), 8.29 (dd, *J* = 8.3, 2.3 Hz, 1H), 8.01 (s, 1H), 7.96 (dt, *J* = 6.8, 2.0 Hz, 1H), 7.81 (dd, *J* = 8.3, 0.7 Hz,

1H), 7.48 – 7.42 (m, 2H), 7.25 – 7.22 (m, 2H), 7.20 – 7.13 (m, 3H), 3.97 (dd,  $J = 8.9$ , 6.6 Hz, 1H), 3.62 (s, 3H), 3.48 (dd,  $J = 13.7$ , 8.9 Hz, 1H), 3.10 (dd,  $J = 13.7$ , 6.6 Hz, 1H), 2.67 (s, 3H);  $^{13}\text{C}$  NMR (150 MHz,  $\text{CDCl}_3$ )  $\delta$  196.6, 173.8, 160.8, 150.3, 139.6, 139.0, 138.7, 136.5, 130.8, 129.8, 129.4, 129.1, 128.5, 127.3, 126.6, 120.4, 53.8, 52.2, 40.0, 26.9; FT-IR (thin film, KBr):  $\nu$  ( $\text{cm}^{-1}$ ) 2929, 1725, 1682, 1588, 1273; HRMS (ESI) calcd  $\text{C}_{23}\text{H}_{22}\text{NO}_3$   $[\text{M} + \text{H}]^+$ : 360.1594, found: 360.1586.

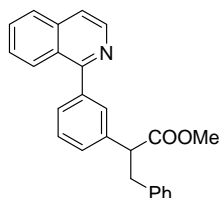

**Methyl 2-(3-(isoquinolin-1-yl)phenyl)-3-phenylpropanoate (3j):** 43% (32 mg); Yellow oil;  $^1\text{H}$  NMR (600 MHz,  $\text{CDCl}_3$ )  $\delta$  8.60 (d,  $J = 5.7$  Hz, 1H), 7.89 – 7.85 (m, 2H), 7.68 (t,  $J = 7.6$  Hz, 1H), 7.64 (d,  $J = 5.6$  Hz, 1H), 7.61 – 7.58 (m, 1H), 7.57 (s, 1H), 7.52 – 7.47 (m, 3H), 7.25 (t,  $J = 7.3$  Hz, 2H), 7.19 (t,  $J = 7.3$  Hz, 1H), 7.15 (d,  $J = 7.9$  Hz, 2H), 3.95 (t,  $J = 7.8$  Hz, 1H), 3.61 (s, 3H), 3.47 (dd,  $J = 13.7$ , 8.6 Hz, 1H), 3.12 (dd,  $J = 13.7$ , 7.0 Hz, 1H);  $^{13}\text{C}$  NMR (150 MHz,  $\text{CDCl}_3$ )  $\delta$  173.8, 160.5, 142.3, 140.0, 139.1, 138.7, 137.0, 130.1, 130.0, 129.1, 128.9, 128.5, 128.1, 127.6, 127.4, 127.1, 126.8, 126.5, 120.2, 53.7, 52.2, 40.0; FT-IR (thin film, KBr):  $\nu$  ( $\text{cm}^{-1}$ ) 2925, 1736, 1553, 1202, 700; HRMS (ESI) calcd  $\text{C}_{25}\text{H}_{21}\text{NO}_2\text{Na}$   $[\text{M} + \text{Na}]^+$ : 390.1465, found: 390.1457.

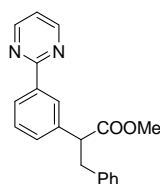

**Methyl 3-phenyl-2-(3-(pyrimidin-2-yl)phenyl)propanoate (3k):** 84% (53 mg); Yellow oil;  $^1\text{H}$  NMR (600 MHz,  $\text{CDCl}_3$ )  $\delta$  8.81 (d,  $J = 4.8$  Hz, 2H), 8.44 (s, 1H), 8.38 – 8.34 (m, 1H), 7.48 – 7.43 (m, 2H), 7.26 – 7.22 (m, 2H), 7.20 – 7.16 (m, 4H), 4.00 (dd,  $J = 9.1$ , 6.4 Hz, 1H), 3.61 (s, 3H), 3.50 (dd,  $J = 13.8$ , 9.1 Hz, 1H), 3.12 (dd,  $J = 13.8$ , 6.4 Hz, 1H);  $^{13}\text{C}$  NMR (150 MHz,  $\text{CDCl}_3$ )  $\delta$  173.8, 164.6, 157.4, 139.3, 139.1, 138.1, 130.4, 129.1, 128.5, 128.0, 127.4, 126.5, 119.3, 53.8, 52.1, 39.9; FT-IR (thin film, KBr):  $\nu$  ( $\text{cm}^{-1}$ ) 2921, 1729, 1553, 1160, 700; HRMS (ESI) calcd  $\text{C}_{20}\text{H}_{18}\text{N}_2\text{O}_2\text{Na}$   $[\text{M} + \text{Na}]^+$ : 341.1260, found: 341.1259.

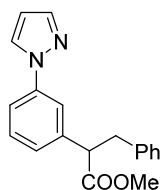

**Methyl 2-(3-(1H-pyrazol-1-yl)phenyl)-3-phenylpropanoate (3l):** 79% (48 mg); Yellow oil;  $^1\text{H}$  NMR (400 MHz,  $\text{CDCl}_3$ )  $\delta$  7.90 – 7.88 (m, 1H), 7.72 (d,  $J = 1.5$  Hz, 1H), 7.67 (t,  $J = 1.9$  Hz, 1H), 7.58 (ddd,  $J = 8.1$ , 2.2, 1.0 Hz, 1H), 7.38 (t,  $J = 7.9$  Hz,

1H), 7.26 – 7.20 (m, 3H), 7.20 – 7.11 (m, 3H), 6.46 (dd,  $J = 2.4, 1.9$  Hz, 1H), 3.92 (dd,  $J = 8.8, 6.8$  Hz, 1H), 3.61 (s, 3H), 3.45 (dd,  $J = 13.7, 8.8$  Hz, 1H), 3.07 (dd,  $J = 13.7, 6.8$  Hz, 1H);  $^{13}\text{C}$  NMR (150 MHz,  $\text{CDCl}_3$ )  $\delta$  173.5, 141.3, 140.5, 140.3, 138.8, 129.8, 129.1, 128.5, 127.0, 126.6, 126.1, 119.0, 118.3, 107.8, 53.6, 52.3, 39.9; FT-IR (thin film, KBr):  $\nu$  ( $\text{cm}^{-1}$ ) 2952, 1729, 1596, 1164, 696; HRMS (ESI) calcd  $\text{C}_{19}\text{H}_{19}\text{N}_2\text{O}_2$  [ $\text{M} + \text{H}$ ] $^+$ : 307.1441, found: 307.1444.

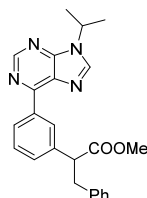

**Methyl 2-(3-(9-isopropyl-9H-purin-6-yl)phenyl)-3-phenylpropanoate (3m):** 26% (21 mg); Yellow oil;  $^1\text{H}$  NMR (600 MHz,  $\text{CDCl}_3$ )  $\delta$  9.02 (s, 1H), 8.77 – 8.73 (m, 2H), 8.20 (s, 1H), 7.53 – 7.48 (m, 2H), 7.25 – 7.21 (m, 2H), 7.21 – 7.15 (m, 3H), 5.03 – 4.95 (m, 1H), 4.04 (dd,  $J = 9.1, 6.4$  Hz, 1H), 3.61 (s, 3H), 3.52 (dd,  $J = 13.8, 9.2$  Hz, 1H), 3.15 (dd,  $J = 13.8, 6.3$  Hz, 1H), 1.68 (d,  $J = 6.8$  Hz, 6H);  $^{13}\text{C}$  NMR (150 MHz,  $\text{CDCl}_3$ )  $\delta$  173.9, 154.6, 152.3, 152.2, 142.2, 139.3, 139.2, 136.4, 131.7, 130.5, 129.3, 129.13, 129.08, 128.5, 126.5, 53.8, 52.2, 47.4, 39.9, 22.8; FT-IR (thin film, KBr):  $\nu$  ( $\text{cm}^{-1}$ ) 2925, 1736, 1577, 1218, 696; HRMS (ESI) calcd  $\text{C}_{24}\text{H}_{25}\text{N}_4\text{O}_2$  [ $\text{M} + \text{H}$ ] $^+$ : 401.1972, found: 401.1968.

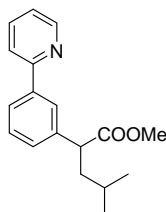

**Methyl 4-methyl-2-(3-(pyridin-2-yl)phenyl)pentanoate (4a):** 77% (44 mg); Yellow oil;  $^1\text{H}$  NMR (600 MHz,  $\text{CDCl}_3$ )  $\delta$  8.69 (d,  $J = 4.5$  Hz, 1H), 7.94 (s, 1H), 7.87 (d,  $J = 7.5$  Hz, 1H), 7.79 – 7.70 (m, 2H), 7.43 (t,  $J = 7.6$  Hz, 1H), 7.40 – 7.36 (m, 1H), 7.24 – 7.21 (m, 1H), 3.77 (t,  $J = 7.8$  Hz, 1H), 3.65 (s, 3H), 2.08 – 1.99 (m, 1H), 1.76 – 1.69 (m, 1H), 1.56 – 1.45 (m, 1H), 0.92 (d,  $J = 6.6$  Hz, 3H), 0.91 (d,  $J = 6.6$  Hz, 3H);  $^{13}\text{C}$  NMR (150 MHz,  $\text{CDCl}_3$ )  $\delta$  174.8, 157.4, 149.8, 140.1, 139.9, 136.9, 129.2, 128.5, 126.9, 125.9, 122.3, 120.9, 52.1, 49.7, 42.7, 26.1, 22.7, 22.5; FT-IR (thin film, KBr):  $\nu$  ( $\text{cm}^{-1}$ ) 2952, 1732, 1588, 1152, 766; HRMS (ESI) calcd  $\text{C}_{18}\text{H}_{21}\text{NO}_2\text{Na}$  [ $\text{M} + \text{Na}$ ] $^+$ : 306.1465, found: 306.1468.

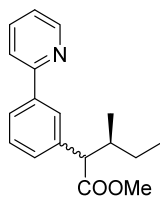

**Methyl (3*R*)-3-methyl-2-(3-(pyridin-2-yl)phenyl)pentanoate (4b):** 63% (36 mg, 1:1.2 dr); Yellow oil;  $^1\text{H}$  NMR (600 MHz,  $\text{CDCl}_3$ )  $\delta$  8.69 (d,  $J = 4.7$  Hz, 1H), 7.94 (s, 1H), 7.92 – 7.87 (m, 1H), 7.77 – 7.71 (m, 2H), 7.45 – 7.39 (m, 2H), 7.23 (dd,  $J = 8.1$ , 3.6 Hz, 1H), 3.66 (s, 3H), 3.39 (d,  $J = 6.7$  Hz, 1H)/ 3.37 (d,  $J = 6.6$  Hz, 1H), 2.28 – 2.18 (m, 1H), 1.60 – 1.53 (m, 0.55H), 1.24 – 1.18 (m, 1.45H), 1.03 (d,  $J = 6.5$  Hz, 1.65H)/0.71 (d,  $J = 6.7$  Hz, 1.35H), 0.96 (t,  $J = 7.4$  Hz, 1.35H)/ 0.79 (t,  $J = 7.4$  Hz, 1.65H);  $^{13}\text{C}$  NMR (150 MHz,  $\text{CDCl}_3$ )  $\delta$  174.7/174.6, 157.4, 149.8, 139.7, 139.0/138.9, 136.9, 129.2/129.1, 129.08/129.06, 127.5, 126.02/125.99, 122.3, 120.9, 58.6, 51.9, 38.13/38.07, 28.1/26.3, 17.4/16.4, 11.3/10.9; FT-IR (thin film, KBr):  $\nu$  ( $\text{cm}^{-1}$ ) 2962, 1732, 1584, 1193, 771; HRMS (ESI) calcd  $\text{C}_{18}\text{H}_{22}\text{NO}_2$   $[\text{M} + \text{H}]^+$ : 284.1645, found: 284.1655.

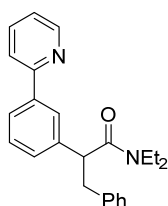

***N,N*-Diethyl-3-phenyl-2-(3-(pyridin-2-yl)phenyl)propenamide (4c):** 96% (69 mg); Yellow oil;  $^1\text{H}$  NMR (600 MHz,  $\text{CDCl}_3$ )  $\delta$  8.69 (d,  $J = 4.6$  Hz, 1H), 7.90 (s, 1H), 7.88 (d,  $J = 6.6$  Hz, 1H), 7.74 (t,  $J = 7.7$  Hz, 1H), 7.68 (d,  $J = 7.9$  Hz, 1H), 7.43 – 7.38 (m, 2H), 7.25 – 7.20 (m, 3H), 7.19 – 7.13 (m, 3H), 4.02 (dd,  $J = 8.7$ , 5.9 Hz, 1H), 3.55 (dd,  $J = 13.3$ , 8.9 Hz, 1H), 3.40 – 3.32 (m, 1H), 3.30 – 3.22 (m, 2H), 3.06 – 2.93 (m, 2H), 1.02 (t,  $J = 7.1$  Hz, 3H), 0.86 (t,  $J = 7.1$  Hz, 3H);  $^{13}\text{C}$  NMR (150 MHz,  $\text{CDCl}_3$ )  $\delta$  171.6, 157.4, 149.8, 140.9, 140.3, 139.8, 136.9, 129.4, 129.3, 128.7, 128.3, 126.7, 126.3, 125.8, 122.3, 120.9, 51.3, 42.0, 41.9, 40.8, 14.5, 13.0; FT-IR (thin film, KBr):  $\nu$  ( $\text{cm}^{-1}$ ) 2971, 2929, 1627, 1432, 700; HRMS (ESI) calcd  $\text{C}_{24}\text{H}_{27}\text{N}_2\text{O}$   $[\text{M} + \text{H}]^+$ : 359.2118, found: 359.2119.

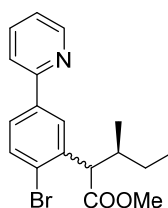

**Methyl (3*R*)-2-(2-bromo-5-(pyridin-2-yl)phenyl)-3-methylpentanoate (4d):** 39% (28 mg, 1:1.1 dr); Yellow oil;  $^1\text{H}$  NMR (600 MHz,  $\text{CDCl}_3$ )  $\delta$  8.69 – 8.67 (m, 1H), 8.16 – 8.13 (m, 1H), 7.81 – 7.77 (m, 1H), 7.76 – 7.70 (m, 2H), 7.67 (dd,  $J = 8.4$ , 2.3 Hz, 1H), 7.25 – 7.22 (m, 1H), 4.13 – 4.07 (m, 1H), 3.68 (s, 1.57H)/3.67 (s, 1.43H), 2.31 – 2.20 (m, 1.3H)/1.65 – 1.58 (m, 0.7H), 1.33 – 1.25 (m, 1H), 1.07 (d,  $J = 6.5$  Hz, 1.57H)/0.74 (d,  $J = 6.8$  Hz, 1.43H), 0.97 (t,  $J = 7.4$  Hz, 1.43H)/0.81 (t,  $J = 7.4$  Hz, 1.57H);  $^{13}\text{C}$  NMR (150 MHz,  $\text{CDCl}_3$ )  $\delta$  174.2/174.1, 156.4, 149.9, 139.22/139.17, 138.3/138.1, 137.0, 133.4, 127.6/127.5, 127.20/127.15, 126.72/126.70, 122.6, 120.7, 55.7/55.6, 52.1, 39.1/38.9, 28.0/26.0, 17.3/15.7, 11.3/11.2; FT-IR (thin film, KBr):  $\nu$  ( $\text{cm}^{-1}$ ) 2963, 1736, 1455, 1170, 780; HRMS (ESI) calcd  $\text{C}_{18}\text{H}_{21}\text{NO}_2^{79}\text{Br}$   $[\text{M} + \text{H}]^+$ :

362.0750, found: 362.0743.

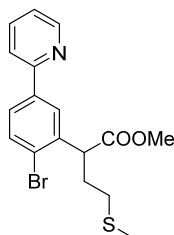

**Methyl 2-(2-bromo-5-(pyridin-2-yl)phenyl)-4-(methylthio)butanoate (4e):** 67% (51 mg); Yellow oil;  $^1\text{H}$  NMR (600 MHz,  $\text{CDCl}_3$ )  $\delta$  8.68 (d,  $J = 4.6$  Hz, 1H), 7.96 (d,  $J = 2.1$  Hz, 1H), 7.80 – 7.72 (m, 2H), 7.68 (t,  $J = 8.5$  Hz, 2H), 7.27 – 7.22 (m, 1H), 4.41 (t,  $J = 7.2$  Hz, 1H), 3.70 (s, 3H), 2.54 – 2.49 (m, 2H), 2.49 – 2.42 (m, 1H), 2.16 – 2.10 (m, 1H), 2.10 (s, 3H);  $^{13}\text{C}$  NMR (150 MHz,  $\text{CDCl}_3$ )  $\delta$  173.5, 156.1, 149.9, 139.4, 138.7, 137.0, 133.7, 127.39, 127.35, 125.7, 122.7, 120.6, 52.5, 49.1, 32.3, 32.0, 15.5; FT-IR (thin film, KBr):  $\nu$  ( $\text{cm}^{-1}$ ) 2913, 1729, 1588, 1219, 778; HRMS (ESI) calcd  $\text{C}_{17}\text{H}_{19}^{79}\text{BrNO}_2\text{S}$   $[\text{M} + \text{H}]^+$ : 380.0314, found: 380.0306.

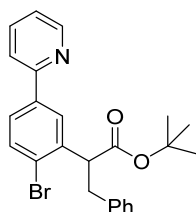

**tert-Butyl 2-(2-bromo-5-(pyridin-2-yl)phenyl)-3-phenylpropanoate (4f):** 76% (67 mg); Yellow oil;  $^1\text{H}$  NMR (600 MHz,  $\text{CDCl}_3$ )  $\delta$  8.71 (d,  $J = 4.7$  Hz, 1H), 8.13 (d,  $J = 1.9$  Hz, 1H), 7.82 (dd,  $J = 8.3$ , 2.0 Hz, 1H), 7.78 – 7.75 (m, 1H), 7.72 – 7.66 (m, 2H), 7.30 – 7.25 (m, 5H), 7.24 – 7.18 (m, 1H), 4.44 (dd,  $J = 9.4$ , 5.8 Hz, 1H), 3.37 (dd,  $J = 13.8$ , 9.5 Hz, 1H), 3.10 (dd,  $J = 13.8$ , 5.8 Hz, 1H), 1.36 (s, 9H);  $^{13}\text{C}$  NMR (150 MHz,  $\text{CDCl}_3$ )  $\delta$  172.0, 156.3, 149.9, 139.2, 139.14, 139.06, 137.0, 133.5, 129.3, 128.4, 127.1, 126.5, 125.8, 122.6, 120.5, 81.4, 53.1, 39.4, 28.0; FT-IR (thin film, KBr):  $\nu$  ( $\text{cm}^{-1}$ ) 2929, 1725, 1460, 1144, 778; HRMS (ESI) calcd  $\text{C}_{24}\text{H}_{25}\text{NO}_2^{79}\text{Br}$   $[\text{M} + \text{H}]^+$ : 438.1063, found: 438.1066.

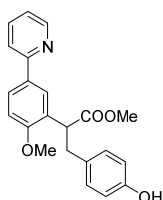

**Methyl 3-(4-hydroxyphenyl)-2-(2-methoxy-5-(pyridin-2-yl)phenyl) propanoate (4g):** 92% (67 mg); Yellow oil;  $^1\text{H}$  NMR (600 MHz,  $\text{CDCl}_3$ )  $\delta$  8.63 (d,  $J = 4.4$  Hz, 1H), 7.89 – 7.85 (m, 1H), 7.84 (d,  $J = 1.2$  Hz, 1H), 7.72 (t,  $J = 7.7$  Hz, 1H), 7.63 (d,  $J = 8.0$  Hz, 1H), 7.21 – 7.16 (m, 1H), 6.96 – 6.87 (m, 3H), 6.62 (d,  $J = 8.3$  Hz, 2H), 4.31 (t,  $J = 7.6$  Hz, 1H), 3.77 (s, 3H), 3.60 (s, 3H), 3.31 (dd,  $J = 13.8$ , 8.3 Hz, 1H), 2.95 (dd,  $J = 13.8$ , 7.0 Hz, 1H);  $^{13}\text{C}$  NMR (150 MHz,  $\text{CDCl}_3$ )  $\delta$  174.6, 157.8, 157.3,

154.8, 149.4, 137.1, 131.8, 131.1, 130.2, 127.9, 127.4, 127.4, 121.8, 120.6, 115.2, 111.2, 55.9, 52.1, 46.7, 38.0; FT-IR (thin film, KBr):  $\nu$  (cm<sup>-1</sup>) 2925, 1732, 1596, 1210, 778; HRMS (ESI) calcd C<sub>22</sub>H<sub>22</sub>NO<sub>4</sub> [M + H]<sup>+</sup>: 364.1543, found: 364.1541.

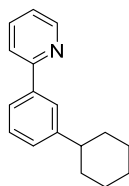

**2-(3-Cyclohexylphenyl)pyridine (4h):** 44% (21 mg); Yellow oil; <sup>1</sup>H NMR (600 MHz, CDCl<sub>3</sub>)  $\delta$  8.70 (d, *J* = 4.7 Hz, 1H), 7.87 (s, 1H), 7.77 (d, *J* = 7.7 Hz, 1H), 7.74 – 7.71 (m, 2H), 7.39 (t, *J* = 7.7 Hz, 1H), 7.29 – 7.26 (m, 1H), 7.23 – 7.20 (m, 1H), 2.61 (tt, *J* = 11.9, 3.2 Hz, 1H), 1.97 – 1.91 (m, 2H), 1.89 – 1.83 (m, 2H), 1.79 – 1.74 (m, 1H), 1.55 – 1.47 (m, 2H), 1.45 – 1.37 (m, 2H), 1.33 – 1.23 (m, 1H); <sup>13</sup>C NMR (150 MHz, CDCl<sub>3</sub>)  $\delta$  158.0, 149.8, 148.8, 139.5, 136.8, 128.8, 127.6, 125.8, 124.6, 122.1, 120.8, 44.9, 34.6, 27.1, 26.3; FT-IR (thin film, KBr):  $\nu$  (cm<sup>-1</sup>) 2921, 2847, 1584, 1464, 770; HRMS (ESI) calcd C<sub>17</sub>H<sub>20</sub>N [M + H]<sup>+</sup>: 238.1590, found: 238.1588.

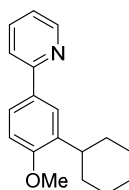

**2-(3-Cyclohexyl-4-methoxyphenyl)pyridine (4i):** 29% (16 mg); Yellow oil; <sup>1</sup>H NMR (600 MHz, CDCl<sub>3</sub>)  $\delta$  8.66 (d, *J* = 4.7 Hz, 1H), 7.88 (d, *J* = 2.1 Hz, 1H), 7.79 (dd, *J* = 8.5, 2.2 Hz, 1H), 7.71 – 7.65 (m, 2H), 7.18 – 7.13 (m, 1H), 6.93 (d, *J* = 8.5 Hz, 1H), 3.88 (s, 3H), 3.04 – 2.97 (m, 1H), 1.91 – 1.80 (m, 4H), 1.79 – 1.72 (m, 1H), 1.55 – 1.42 (m, 4H), 1.34 – 1.25 (m, 1H); <sup>13</sup>C NMR (150 MHz, CDCl<sub>3</sub>)  $\delta$  157.9, 157.8, 149.6, 136.7, 136.6, 131.9, 125.5, 125.3, 121.3, 120.1, 110.6, 55.7, 37.2, 33.3, 27.3, 26.6; FT-IR (thin film, KBr):  $\nu$  (cm<sup>-1</sup>) 2923, 2849, 1587, 1240, 779; HRMS (ESI) calcd C<sub>18</sub>H<sub>22</sub>NO [M + H]<sup>+</sup>: 268.1696, found: 268.1698.

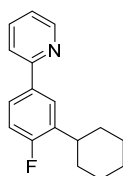

**2-(3-Cyclohexyl-4-fluorophenyl)pyridine (4j):** 65% (33 mg); Yellow oil; <sup>1</sup>H NMR (600 MHz, CDCl<sub>3</sub>)  $\delta$  8.67 (d, *J* = 4.7 Hz, 1H), 7.91 (dd, *J* = 7.2, 2.1 Hz, 1H), 7.77 – 7.71 (m, 2H), 7.67 (d, *J* = 7.9 Hz, 1H), 7.22 – 7.18 (m, 1H), 7.10 – 7.06 (m, 1H), 2.92 (tt, *J* = 12.1, 3.2 Hz, 1H), 1.94 – 1.83 (m, 4H), 1.77 (d, *J* = 13.0 Hz, 1H), 1.61 – 1.52 (m, 2H), 1.50 – 1.39 (m, 2H), 1.32 – 1.23 (m, 1H); <sup>13</sup>C NMR (150 MHz, CDCl<sub>3</sub>)  $\delta$  161.6 (d, *J* = 247.3 Hz), 157.1, 149.8, 136.8, 135.6 (d, *J* = 2.8 Hz), 134.9 (d, *J* = 15.2 Hz), 126.8 (d, *J* = 5.7 Hz), 125.8 (d, *J* = 8.7 Hz), 122.0, 120.5, 115.7 (d, *J* = 23.7 Hz),

37.7, 33.1, 27.0, 26.3;  $^{19}\text{F}$  NMR (377 MHz,  $\text{CDCl}_3$ )  $\delta$  -119.24 – -119.30 (m, 1F); FT-IR (thin film, KBr):  $\nu$  ( $\text{cm}^{-1}$ ) 2925, 2852, 1588, 1228, 778; HRMS (ESI) calcd  $\text{C}_{17}\text{H}_{19}\text{NF}$   $[\text{M} + \text{H}]^+$ : 256.1496, found: 256.1501.

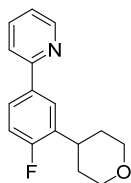

**2-(4-Fluoro-3-(tetrahydro-2H-pyran-4-yl)phenyl)pyridine (4k):** 76% (39 mg); Yellow oil;  $^1\text{H}$  NMR (600 MHz,  $\text{CDCl}_3$ )  $\delta$  8.69 – 8.65 (m, 1H), 7.92 (d,  $J$  = 7.2 Hz, 1H), 7.80 – 7.76 (m, 1H), 7.76 – 7.71 (m, 1H), 7.66 (dd,  $J$  = 7.9, 0.7 Hz, 1H), 7.23 – 7.19 (m, 1H), 7.11 (t,  $J$  = 9.3 Hz, 1H), 4.09 (dd,  $J$  = 11.4, 4.1 Hz, 2H), 3.57 (t,  $J$  = 11.7 Hz, 2H), 3.19 – 3.12 (m, 1H), 2.02 – 1.90 (m, 2H), 1.83 – 1.76 (m, 2H);  $^{13}\text{C}$  NMR (150 MHz,  $\text{CDCl}_3$ )  $\delta$  161.5 (d,  $J$  = 247.7 Hz), 156.8, 149.8, 136.9, 135.8 (d,  $J$  = 2.8 Hz), 132.8 (d,  $J$  = 14.8 Hz), 126.7 (d,  $J$  = 5.2 Hz), 126.4 (d,  $J$  = 8.7 Hz), 122.1, 120.4, 115.8 (d,  $J$  = 23.4 Hz), 68.5, 35.1, 32.6;  $^{19}\text{F}$  NMR (377 MHz,  $\text{CDCl}_3$ )  $\delta$  -119.18 – -119.24 (m, 1F); FT-IR (thin film, KBr):  $\nu$  ( $\text{cm}^{-1}$ ) 2948, 2839, 1588, 1230, 778; HRMS (ESI) calcd  $\text{C}_{16}\text{H}_{17}\text{NOF}$   $[\text{M} + \text{H}]^+$ : 258.1289, found: 258.1285.

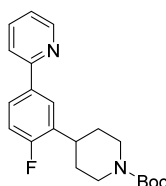

**tert-Butyl 4-(2-fluoro-5-(pyridin-2-yl)phenyl)piperidine-1-carboxylate (4l):** 40% (29 mg); Yellow oil;  $^1\text{H}$  NMR (600 MHz,  $\text{CDCl}_3$ )  $\delta$  8.67 (d,  $J$  = 4.5 Hz, 1H), 7.88 (d,  $J$  = 7.0 Hz, 1H), 7.79 – 7.76 (m, 1H), 7.74 (t,  $J$  = 7.7 Hz, 1H), 7.66 (d,  $J$  = 7.9 Hz, 1H), 7.24 – 7.19 (m, 1H), 7.11 (t,  $J$  = 9.2 Hz, 1H), 4.37 – 4.17 (m, 2H), 3.09 – 3.02 (m, 1H), 2.90 – 2.77 (m, 2H), 1.89 – 1.83 (m, 2H), 1.82 – 1.71 (m, 2H), 1.48 (s, 9H);  $^{13}\text{C}$  NMR (150 MHz,  $\text{CDCl}_3$ )  $\delta$  161.5 (d,  $J$  = 247.7 Hz), 156.8, 154.9, 149.8, 136.9, 135.8 (d,  $J$  = 2.5 Hz), 132.8 (d,  $J$  = 14.9 Hz), 126.7 (d,  $J$  = 5.0 Hz), 126.4 (d,  $J$  = 8.7 Hz), 122.2, 120.4, 115.9 (d,  $J$  = 23.5 Hz), 79.6, 44.7, 36.0, 31.9, 28.6;  $^{19}\text{F}$  NMR (377 MHz,  $\text{CDCl}_3$ )  $\delta$  -119.16 (s, 1F); FT-IR (thin film, KBr):  $\nu$  ( $\text{cm}^{-1}$ ) 2929, 1686, 1425, 1164, 774; HRMS (ESI) calcd  $\text{C}_{21}\text{H}_{26}\text{FN}_2\text{O}_2$   $[\text{M} + \text{H}]^+$ : 357.1973, found: 357.1969.

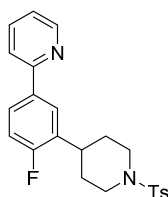

**2-(4-Fluoro-3-(1-tosylpiperidin-4-yl)phenyl)pyridine (4m):** 59% (48 mg); Yellow solid; 202-204  $^{\circ}\text{C}$ ;  $^1\text{H}$  NMR (600 MHz,  $\text{CDCl}_3$ )  $\delta$  8.69 – 8.63 (m, 1H), 7.85 (dd,  $J$  = 7.2, 2.2 Hz, 1H), 7.79 – 7.72 (m, 2H), 7.68 (d,  $J$  = 8.2 Hz, 2H), 7.65 (d,  $J$  = 8.0 Hz,

1H), 7.35 (d,  $J = 8.0$  Hz, 2H), 7.24 – 7.21 (m, 1H), 7.10 – 7.06 (m, 1H), 3.97 – 3.94 (m, 2H), 2.85 – 2.79 (m, 1H), 2.44 (s, 3H), 2.41 – 2.36 (m, 2H), 2.01 – 1.95 (m, 2H), 1.94 – 1.91 (m, 2H);  $^{13}\text{C}$  NMR (150 MHz,  $\text{CDCl}_3$ )  $\delta$  161.3 (d,  $J = 247.7$  Hz), 156.6, 149.8, 143.7, 137.0, 135.9 (d,  $J = 3.0$  Hz), 133.3, 131.9 (d,  $J = 14.9$  Hz), 129.8, 127.9, 126.7 (d,  $J = 8.8$  Hz), 126.5 (d,  $J = 4.9$  Hz), 122.2, 120.4, 115.9 (d,  $J = 23.3$  Hz), 47.0, 35.0, 31.3, 21.7;  $^{19}\text{F}$  NMR (377 MHz,  $\text{CDCl}_3$ )  $\delta$  -119.26 (s, 1F); FT-IR (thin film, KBr):  $\nu$  ( $\text{cm}^{-1}$ ) 2925, 2858, 1432, 1160, 774; HRMS (ESI) calcd  $\text{C}_{23}\text{H}_{24}\text{FN}_2\text{O}_2\text{S}$   $[\text{M} + \text{H}]^+$ : 411.1537, found: 411.1542.

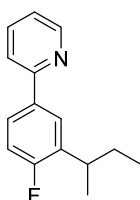

**2-(3-(*sec*-Butyl)-4-fluorophenyl)pyridine (4n):** 59% (27 mg); Yellow oil;  $^1\text{H}$  NMR (600 MHz,  $\text{CDCl}_3$ )  $\delta$  8.68 – 8.67 (m, 1H), 7.87 (dd,  $J = 7.2, 2.3$  Hz, 1H), 7.77 – 7.71 (m, 2H), 7.67 (d,  $J = 8.0$  Hz, 1H), 7.23 – 7.20 (m, 1H), 7.11 – 7.07 (m, 1H), 3.06 – 3.01 (m, 1H), 1.74 – 1.65 (m, 2H), 1.32 (d,  $J = 7.0$  Hz, 3H), 0.88 (t,  $J = 7.4$  Hz, 3H);  $^{13}\text{C}$  NMR (150 MHz,  $\text{CDCl}_3$ )  $\delta$  161.8 (d,  $J = 247.2$  Hz), 157.1, 149.8, 136.9, 135.6 (d,  $J = 2.8$  Hz), 134.6 (d,  $J = 15.3$  Hz), 127.1 (d,  $J = 5.8$  Hz), 125.9 (d,  $J = 8.8$  Hz), 122.0, 120.5, 115.7 (d,  $J = 23.8$  Hz), 34.8, 30.1, 20.7, 12.4;  $^{19}\text{F}$  NMR (377 MHz,  $\text{CDCl}_3$ )  $\delta$  -118.74 (s, 1F); FT-IR (thin film, KBr):  $\nu$  ( $\text{cm}^{-1}$ ) 2956, 2929, 1456, 1222, 774; HRMS (ESI) calcd  $\text{C}_{15}\text{H}_{17}\text{FN}$   $[\text{M} + \text{H}]^+$ : 230.1340, found: 230.1345.

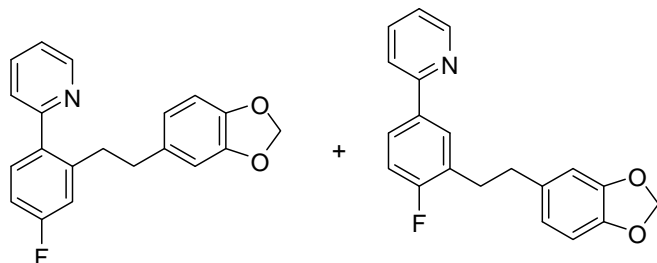

**2-(3-(2-(Benzo[*d*][1,3]dioxol-5-yl)ethyl)-4-fluorophenyl)pyridine (4o):** 63% (40 mg,  $m:o = 1:1.5$ ); Yellow oil;  $^1\text{H}$  NMR (600 MHz,  $\text{CDCl}_3$ )  $\delta$  8.71 – 8.66 (m, 1H), 7.84 (dd,  $J = 7.3, 2.1$  Hz, 0.4H), 7.81 – 7.76 (m, 0.4H), 7.76 – 7.71 (m, 1H), 7.64 (d,  $J = 7.9$  Hz, 0.4H), 7.31 (dd,  $J = 8.3, 6.0$  Hz, 0.6H), 7.34 – 7.27 (m, 1.2H), 7.24 – 7.20 (m, 0.4H), 7.11 (t,  $J = 9.0$  Hz, 0.4H), 7.02 – 6.95 (m, 1.2H), 6.74 – 6.71 (m, 0.8H), 6.68 – 6.63 (m, 1H), 6.47 – 6.42 (m, 1.2H), 5.91 (s, 0.8H), 5.89 (s, 1.2H), 2.99 – 2.94 (m, 2H), 2.91 – 2.86 (m, 0.8H), 2.71 – 2.66 (m, 1.2H);  $^{13}\text{C}$  NMR (150 MHz,  $\text{CDCl}_3$ )  $\delta$  162.8 (d,  $J = 247.0$  Hz), 162.0 (d,  $J = 247.7$  Hz), 159.4, 156.8, 149.7, 149.3, 147.7, 147.6, 145.9, 145.8, 142.4 (d,  $J = 7.4$  Hz), 136.9, 136.6 (d,  $J = 2.9$  Hz), 136.5, 135.5 (d,  $J = 4.2$  Hz), 131.6 (d,  $J = 8.4$  Hz), 129.5 (d,  $J = 5.5$  Hz), 128.9 (d,  $J = 16.4$  Hz), 126.5 (d,  $J = 8.5$  Hz), 124.2, 122.1, 122.0, 121.4, 121.2, 120.4, 116.6 (d,  $J = 21.1$  Hz), 115.7 (d,  $J = 22.8$  Hz), 113.1 (d,  $J = 21.2$  Hz), 109.1, 108.9, 108.3, 108.2, 100.9, 100.8, 37.3, 36.4, 35.7, 31.9;  $^{19}\text{F}$  NMR (377 MHz,  $\text{CDCl}_3$ )  $\delta$  -114.07 – -114.13 (m, 0.6F), -118.79 – -118.83 (m, 0.4F); FT-IR (thin film, KBr):  $\nu$  ( $\text{cm}^{-1}$ ) 2925, 1495, 1234, 1035, 778; HRMS (ESI) calcd  $\text{C}_{20}\text{H}_{17}\text{FNO}_2$   $[\text{M} + \text{H}]^+$ : 322.1238, found: 322.1241.

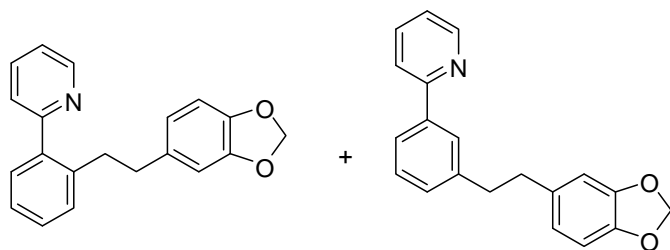

**2-(3-(2-(Benzo[d][1,3]dioxol-5-yl)ethyl)phenyl)pyridine (4p):** 33% (20 mg, *m:o* = 1:1.5); Yellow oil;  $^1\text{H}$  NMR (600 MHz,  $\text{CDCl}_3$ )  $\delta$  8.72 – 8.69 (m, 1H), 7.86 (s, 0.4H), 7.80 (d,  $J$  = 7.6 Hz, 0.4H), 7.77 – 7.70 (m, 1.6H), 7.39 (t,  $J$  = 7.6 Hz, 0.6H), 7.37 – 7.32 (m, 1.6H), 7.32 – 7.26 (m, 1.6H), 7.23 (t,  $J$  = 6.3 Hz, 0.8H), 6.75 – 6.71 (m, 0.8H), 6.65 (d,  $J$  = 7.9 Hz, 1H), 6.49 – 6.43 (m, 1.2H), 5.92 (s, 0.8H), 5.88 (s, 1.2H), 3.00 – 2.95 (m, 2H), 2.93 – 2.88 (m, 0.8H), 2.71 – 2.67 (m, 1.2H);  $^{13}\text{C}$  NMR (150 MHz,  $\text{CDCl}_3$ )  $\delta$  160.3, 157.7, 149.8, 149.2, 147.7, 147.5, 145.8, 145.6, 142.3, 140.5, 139.8, 139.6, 136.9, 136.4, 136.0, 135.7, 130.1, 129.9, 129.3, 128.9, 128.5, 127.2, 126.3, 124.7, 124.2, 122.2, 121.9, 121.4, 121.2, 120.8, 38.5, 37.8, 37.7, 35.8; FT-IR (thin film, KBr):  $\nu$  ( $\text{cm}^{-1}$ ) 2921, 1491, 1245, 1039, 751; HRMS (ESI) calcd  $\text{C}_{20}\text{H}_{18}\text{NO}_2$   $[\text{M} + \text{H}]^+$ : 304.1332, found: 304.1334.

## 7. NMR Spectra for the substrates and products

### $^1\text{H}$ NMR of **1d**

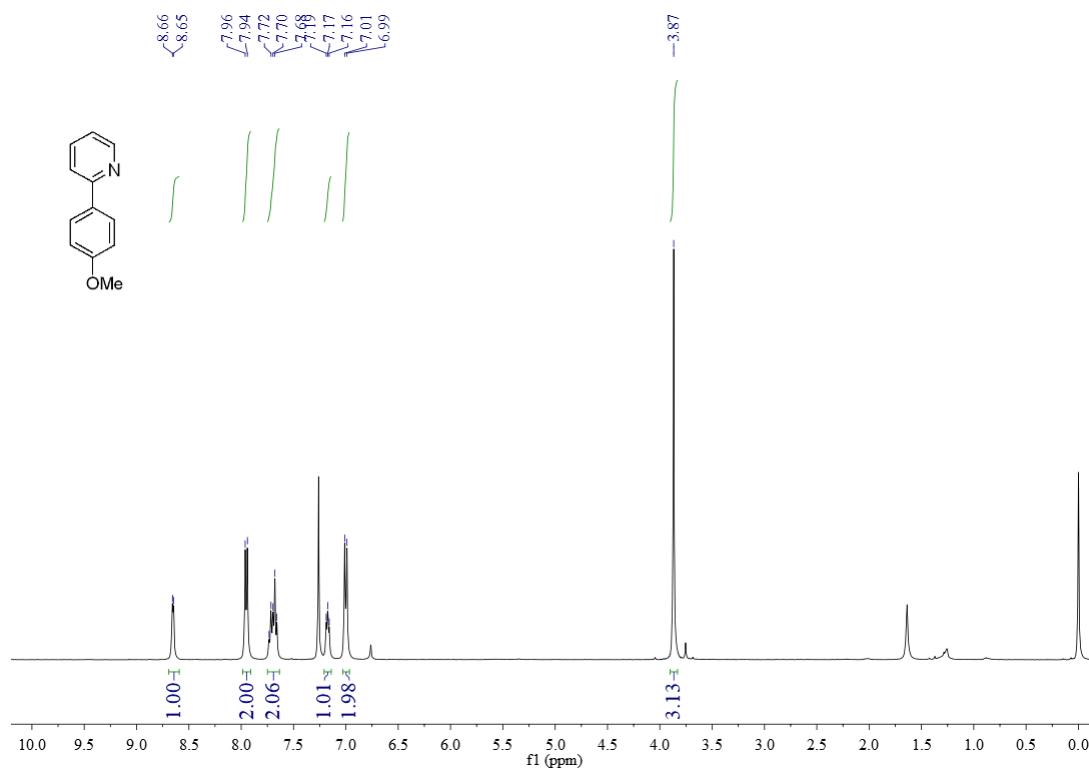

### $^{13}\text{C}$ NMR of **1d**

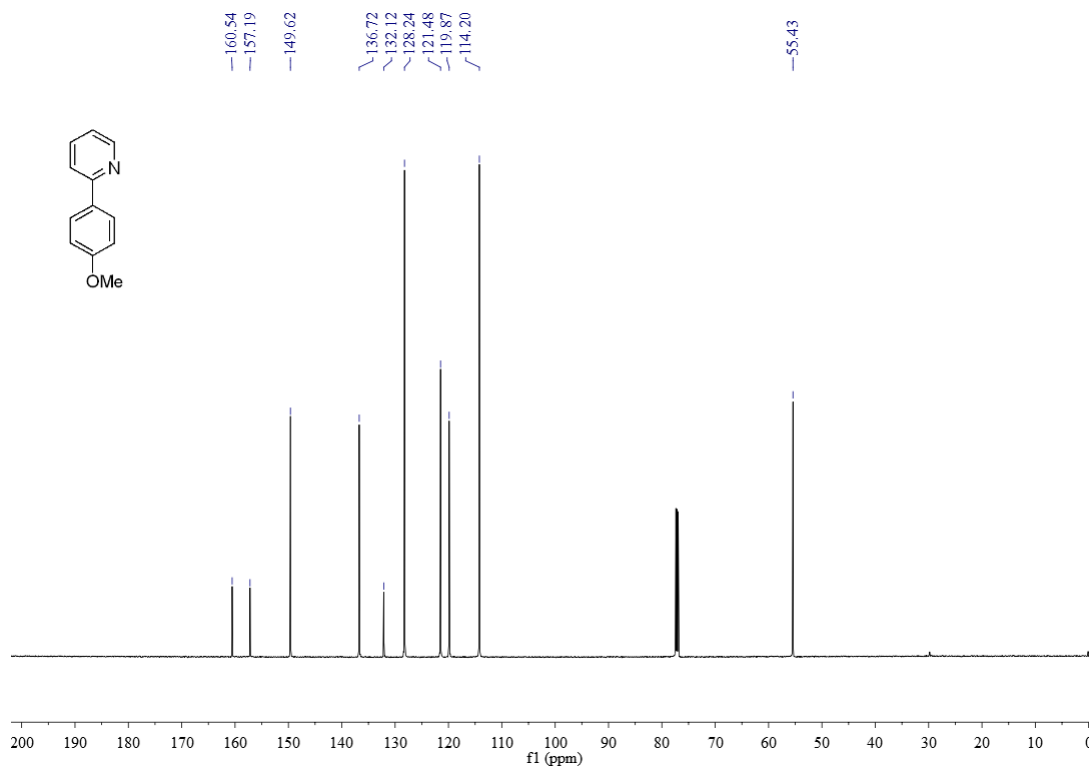

<sup>1</sup>H NMR of **1g**

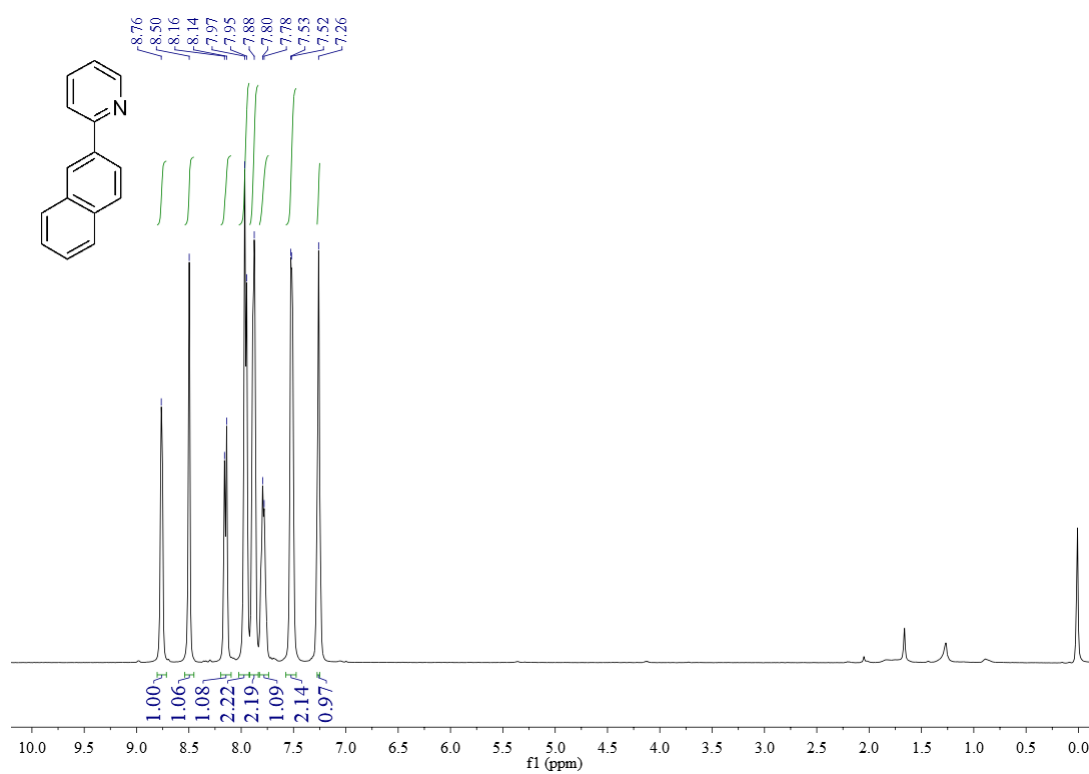

<sup>13</sup>C NMR of **1g**

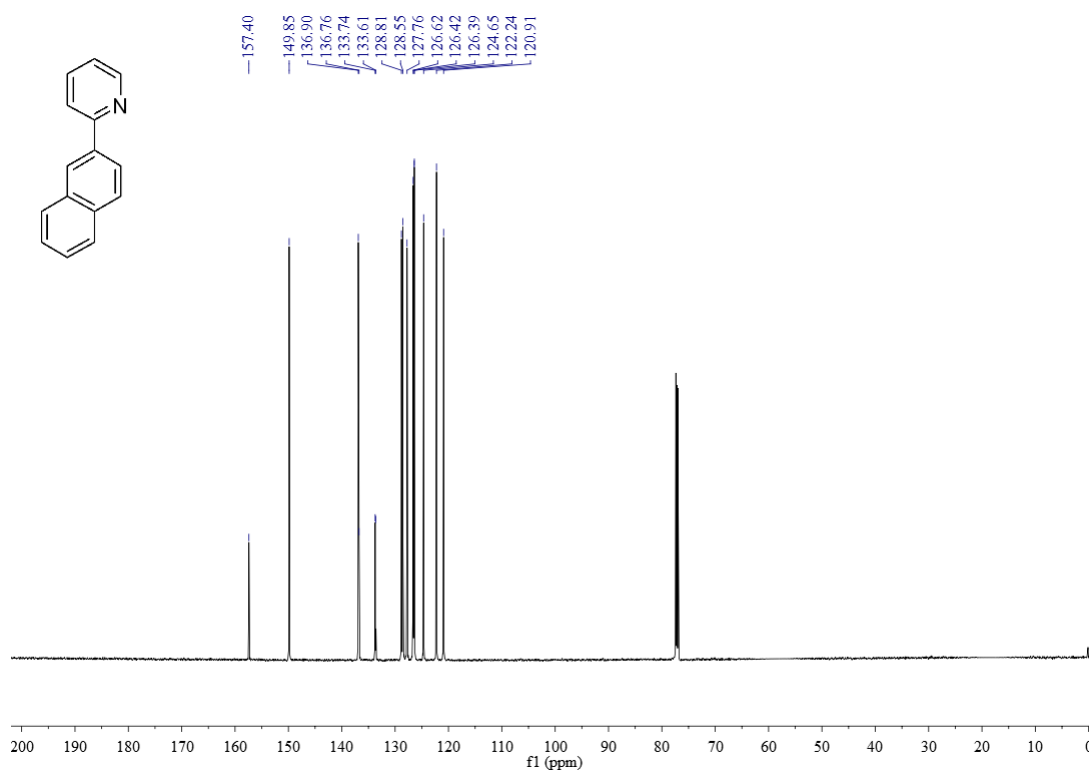

$^1\text{H}$  NMR of **1i**

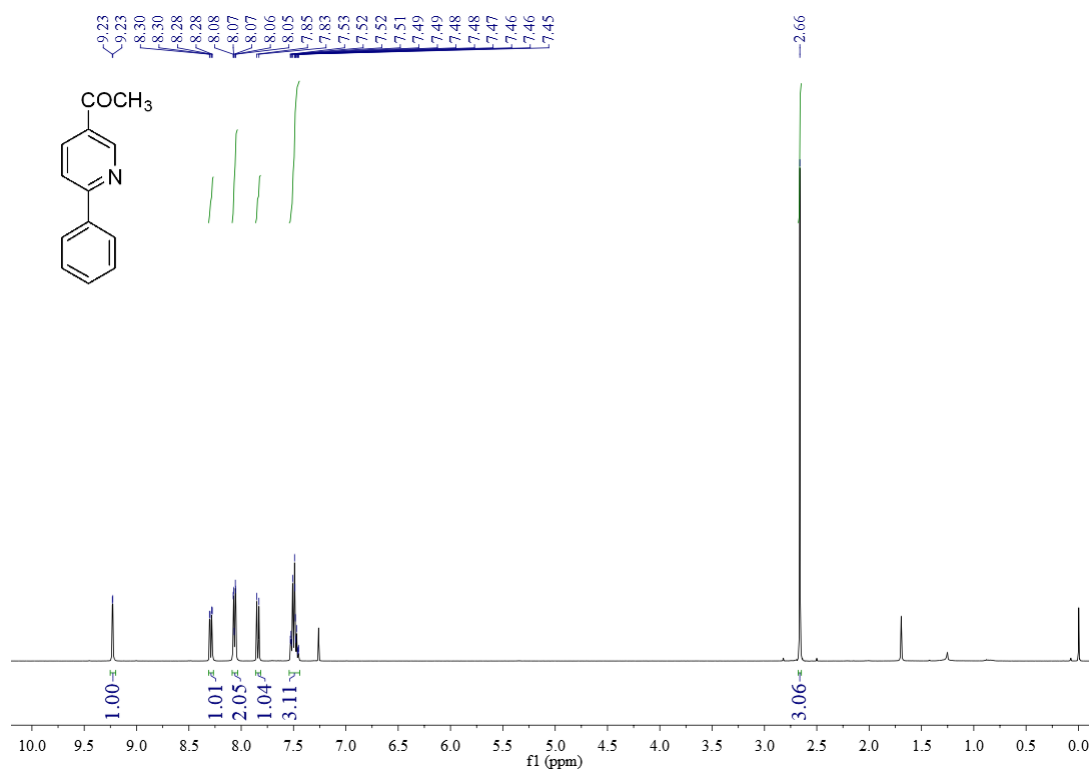

$^{13}\text{C}$  NMR of **1i**

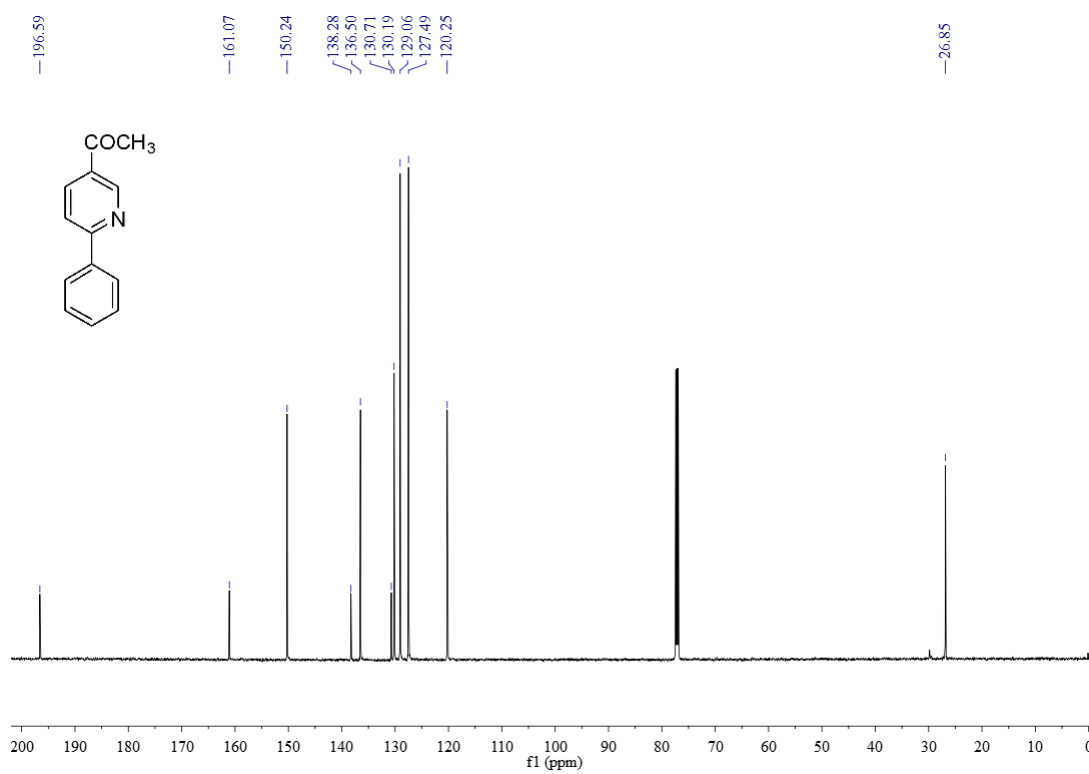

$^1\text{H}$  NMR of **1k**

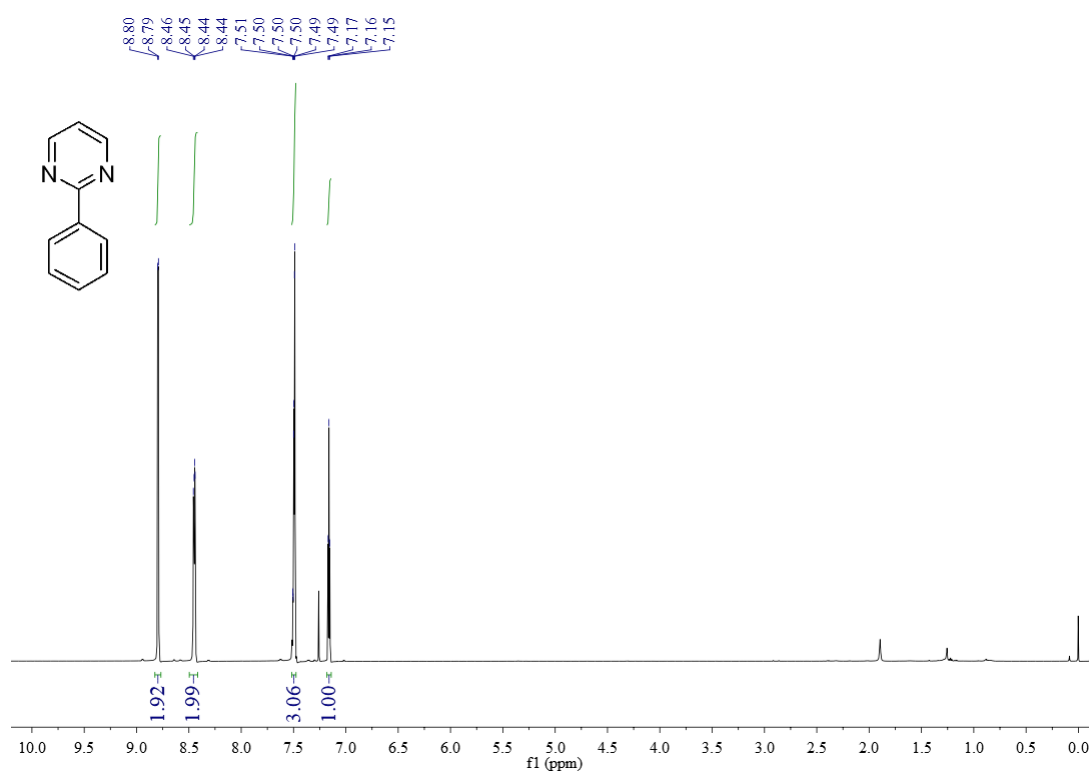

$^{13}\text{C}$  NMR of **1k**

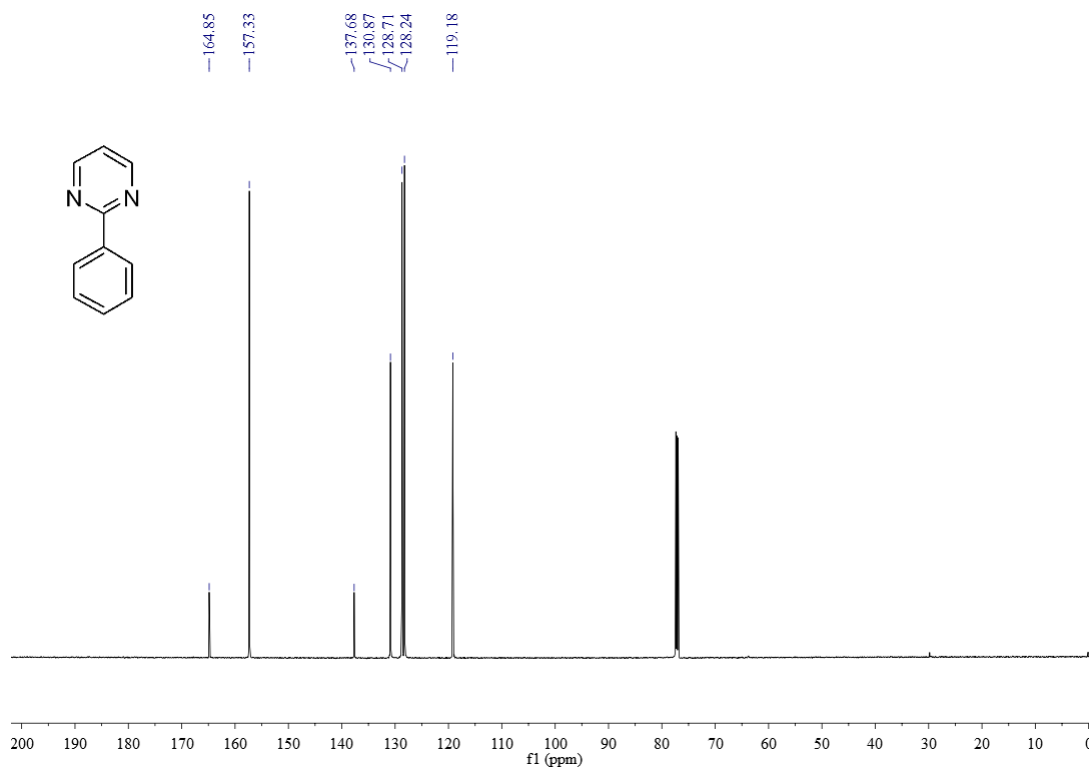

$^1\text{H}$  NMR of **11**

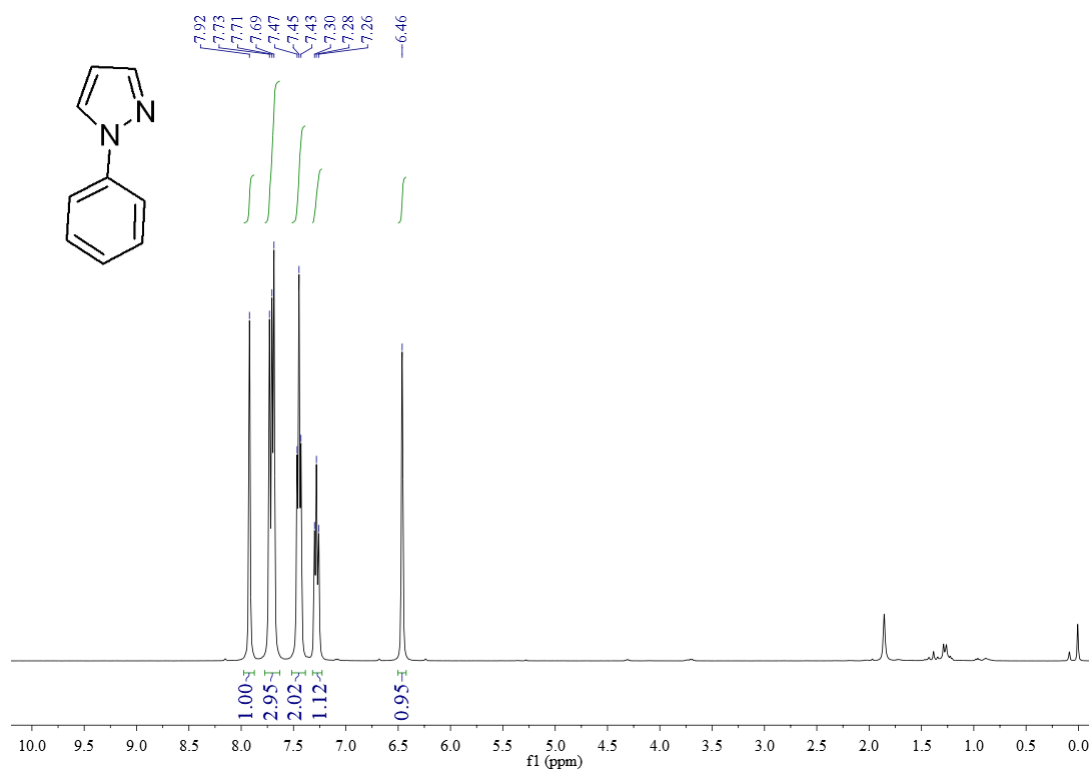

$^{13}\text{C}$  NMR of **11**

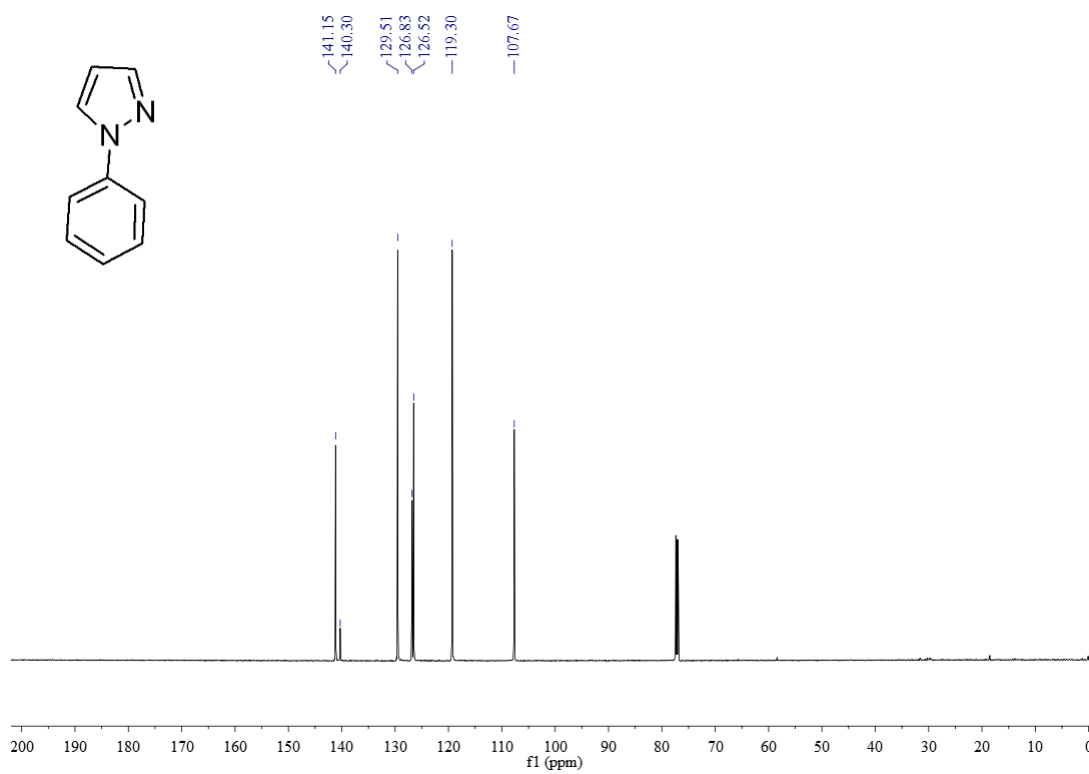

# <sup>1</sup>H NMR of **1m**

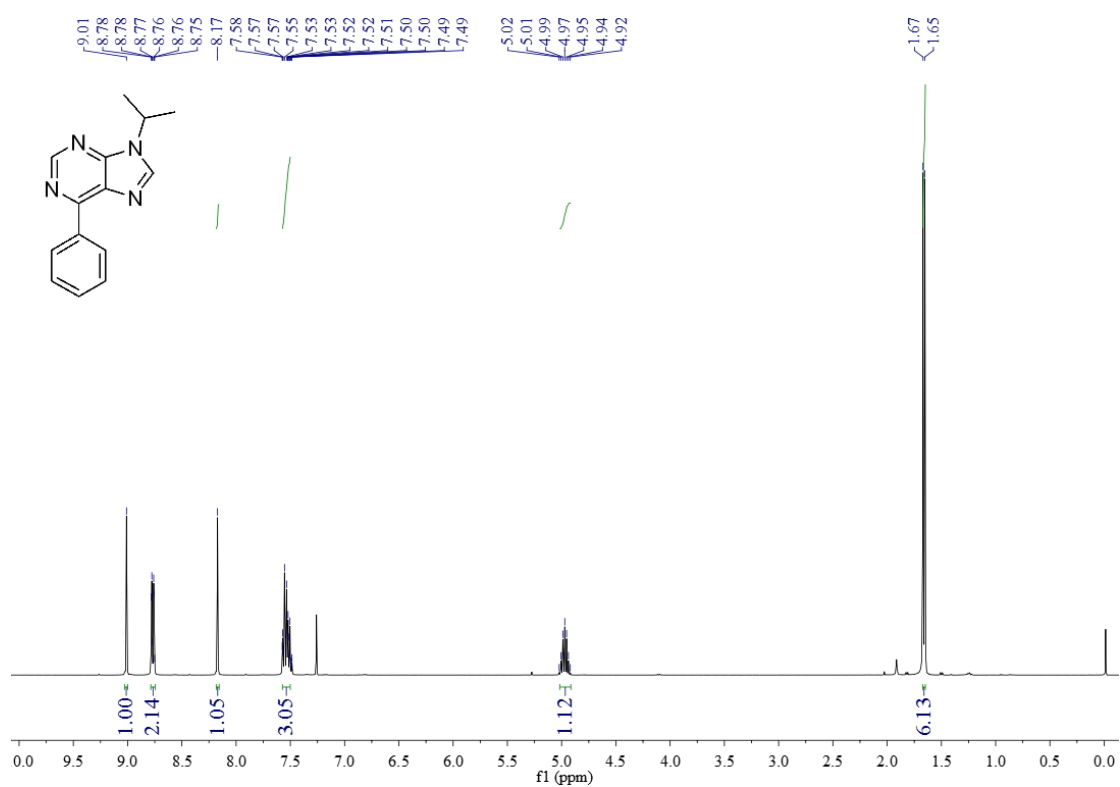

# <sup>13</sup>C NMR of **1m**

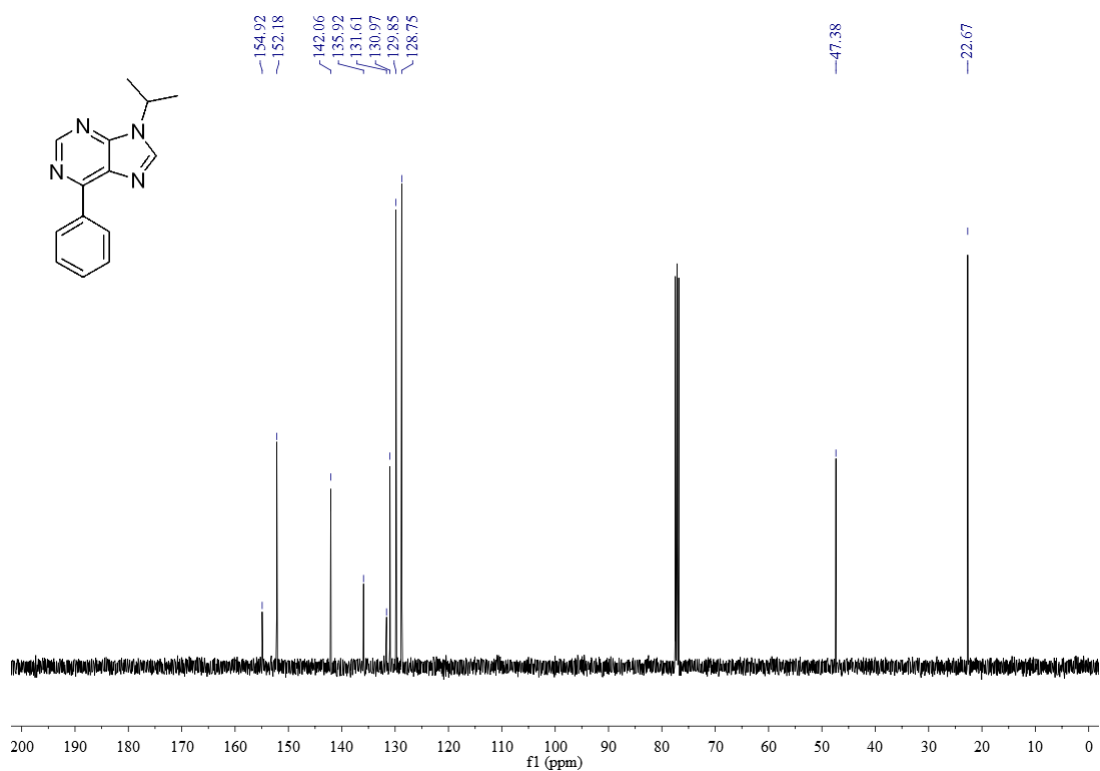

$^1\text{H}$  NMR of **1n**

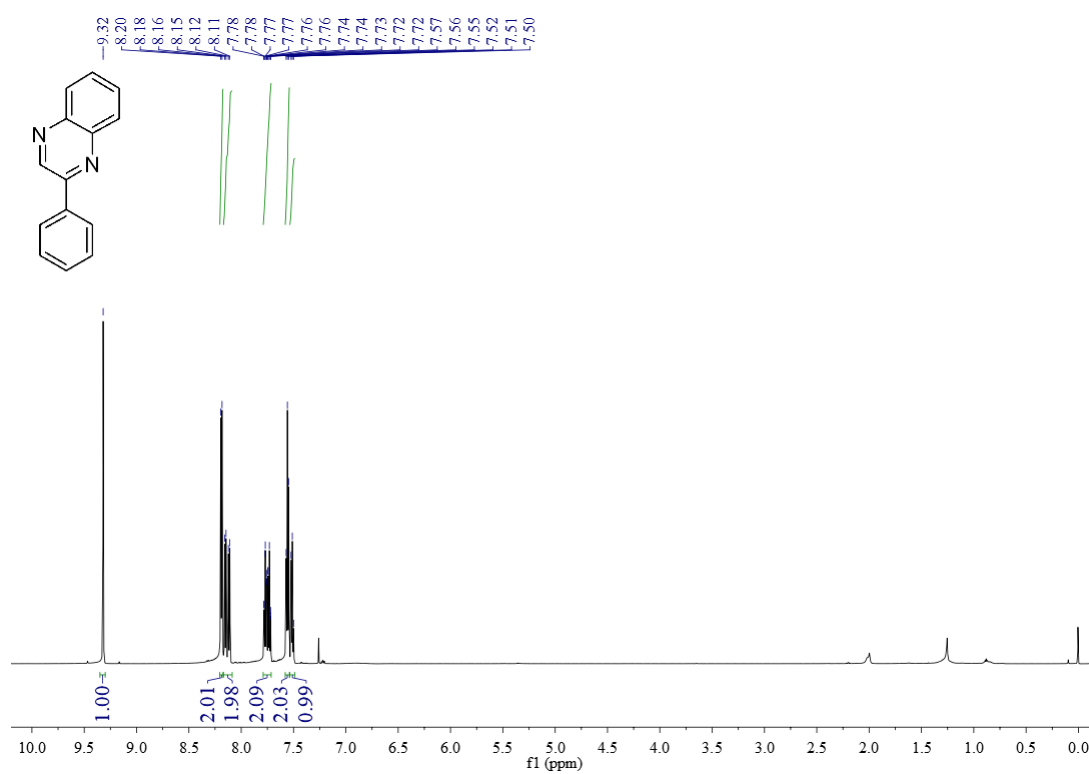

$^{13}\text{C}$  NMR of **1n**

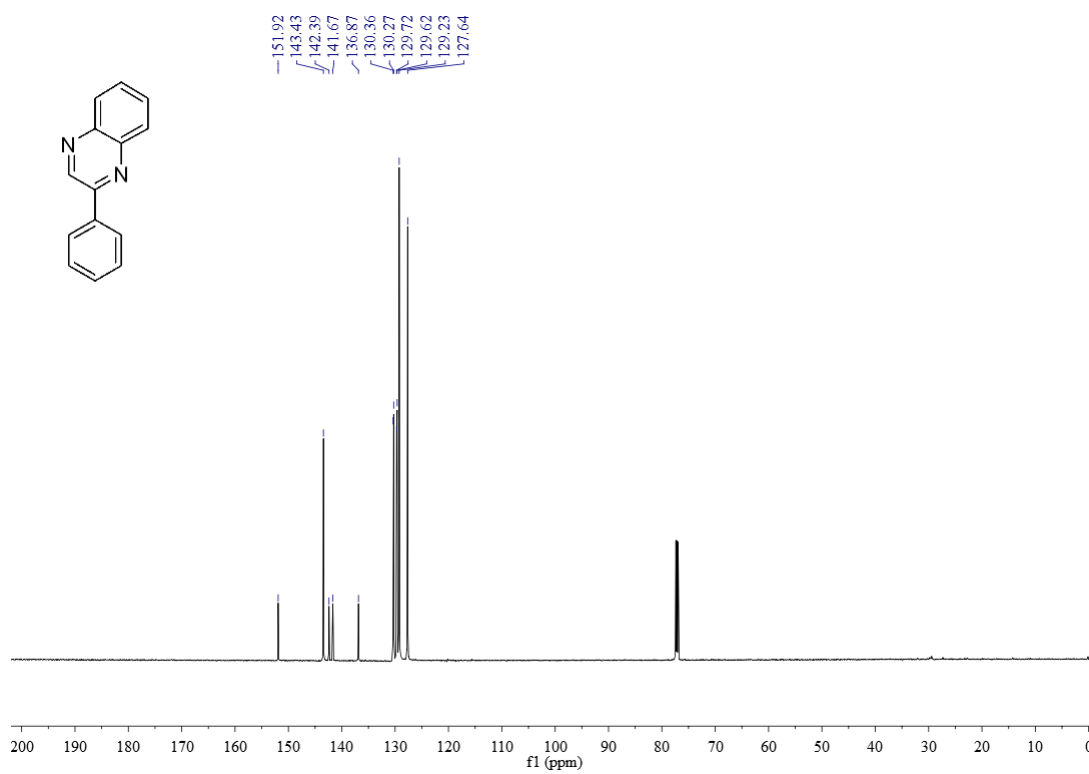

$^1\text{H}$  NMR of **1o**

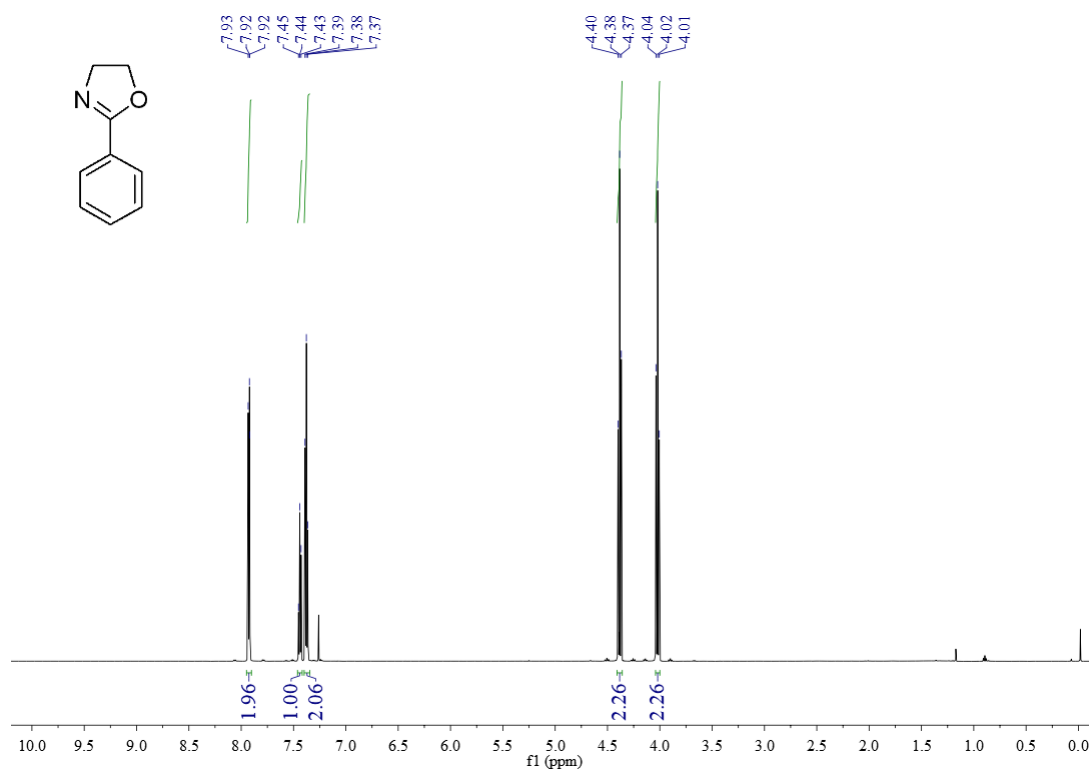

$^{13}\text{C}$  NMR of **1o**

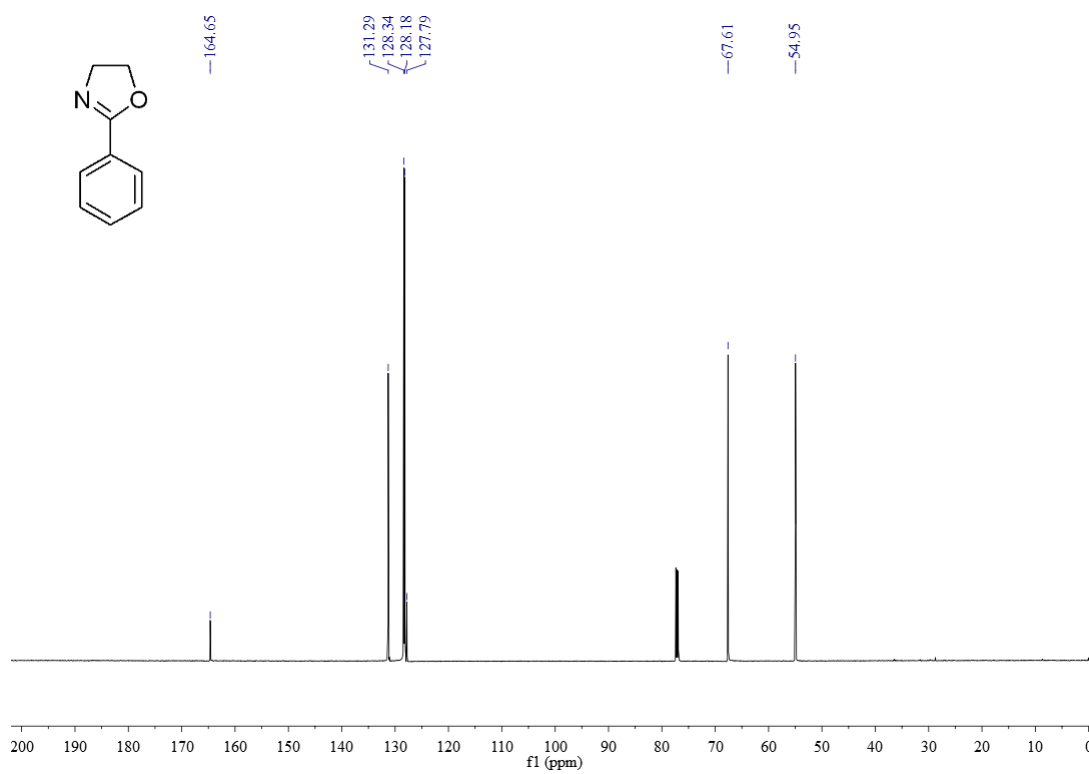

# <sup>1</sup>H NMR of **1p**

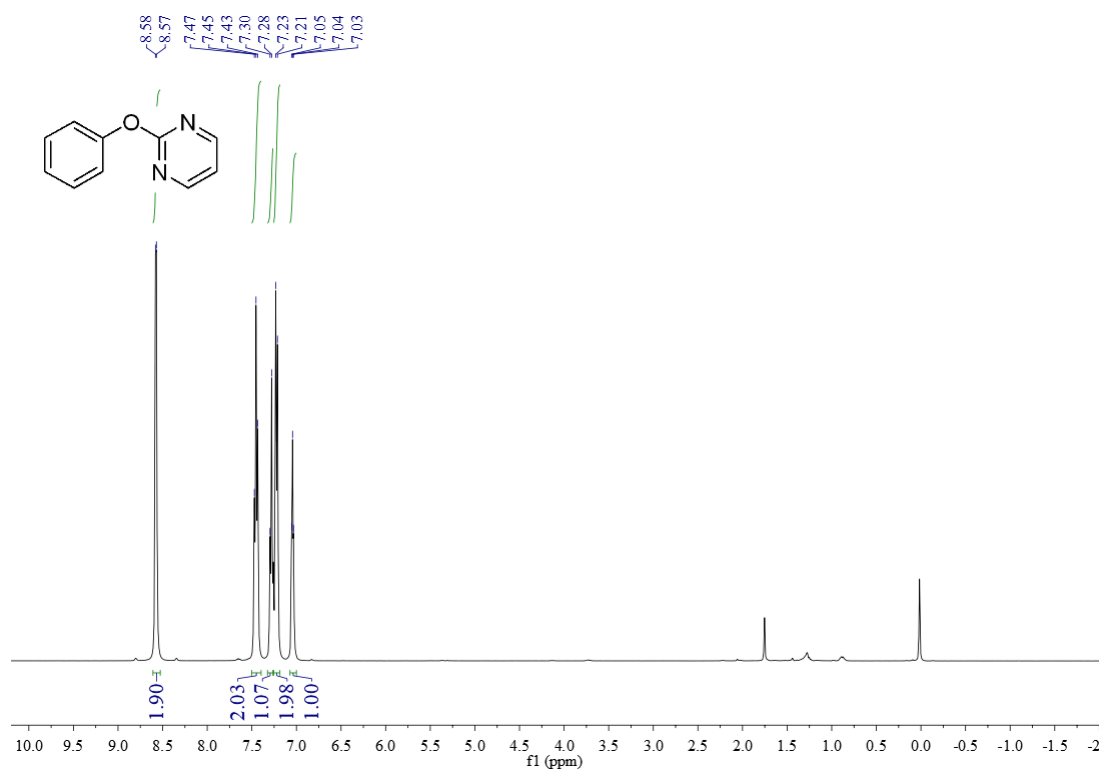

# <sup>13</sup>C NMR of **1p**

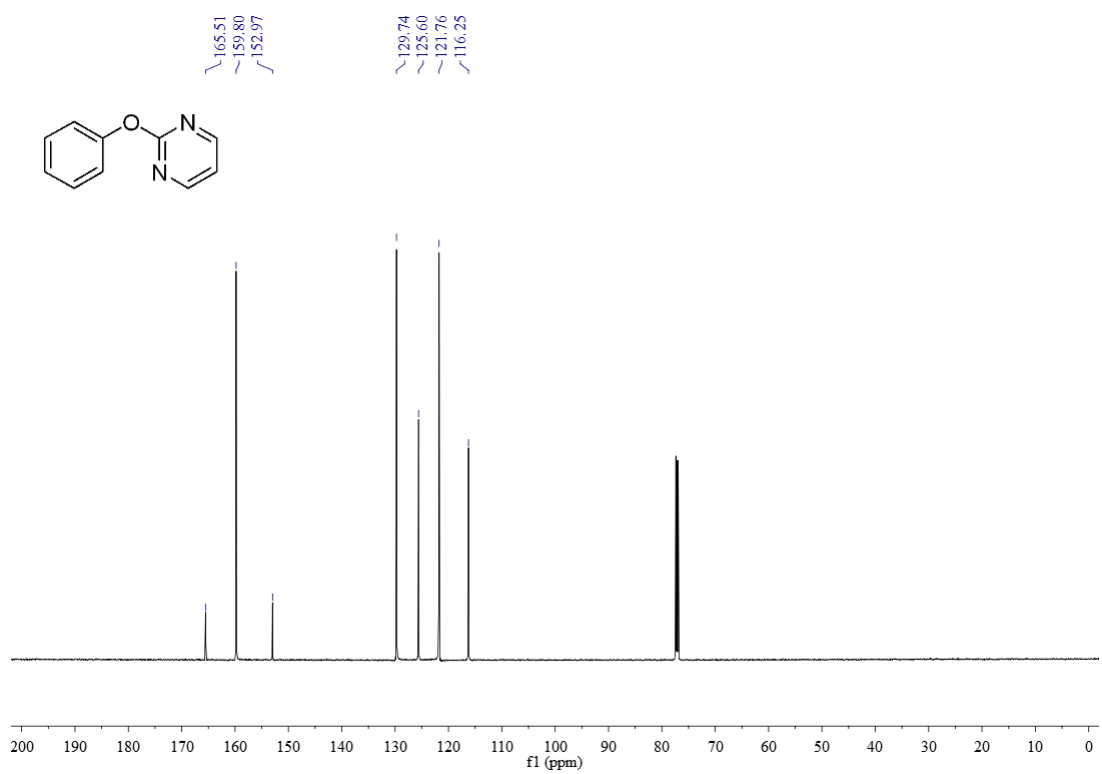

<sup>1</sup>H NMR of **2a**

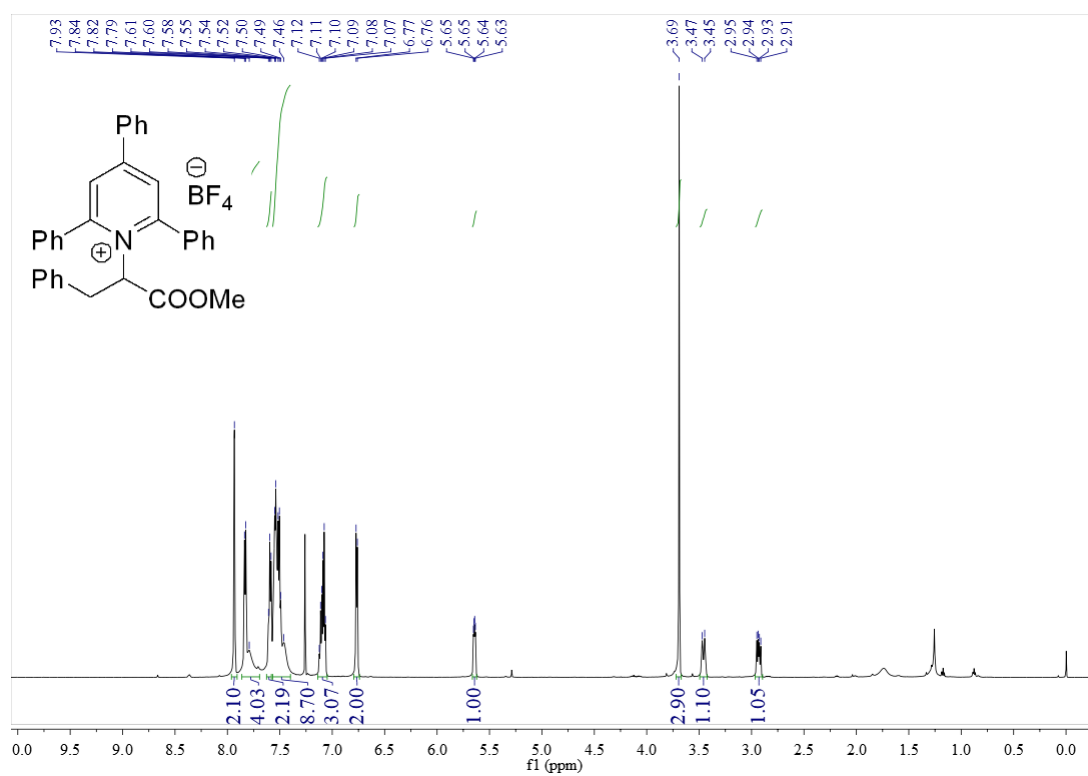

<sup>13</sup>C NMR of **2a**

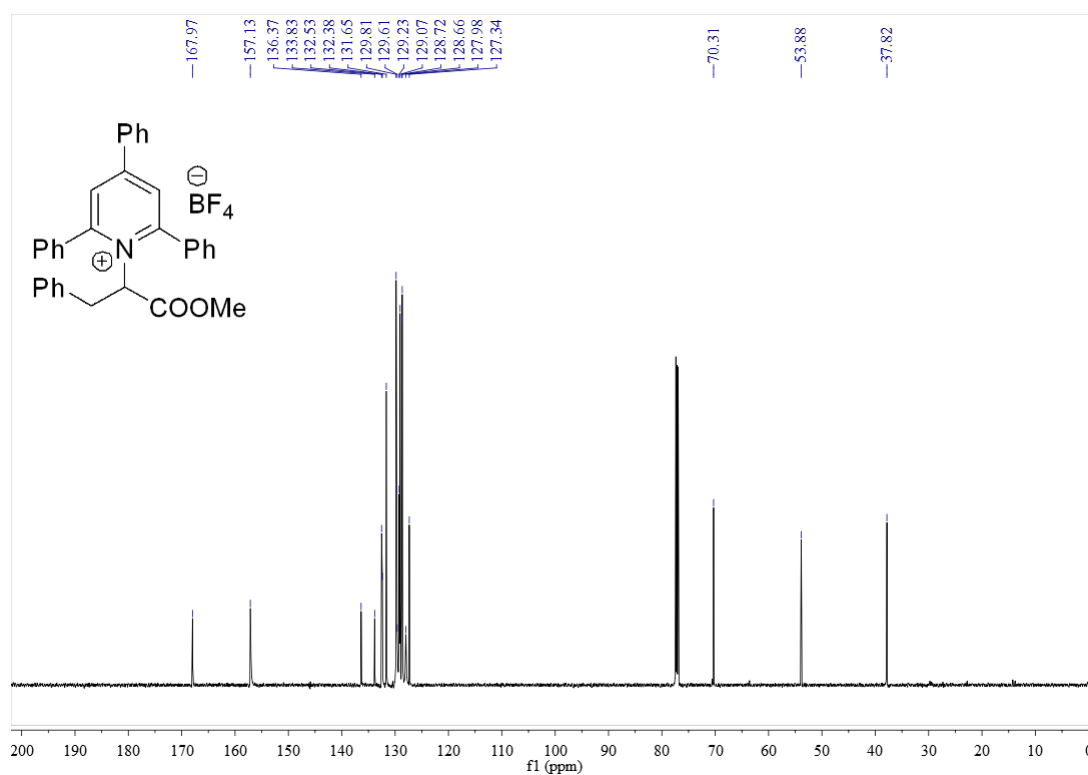

<sup>19</sup>F NMR of **2a**

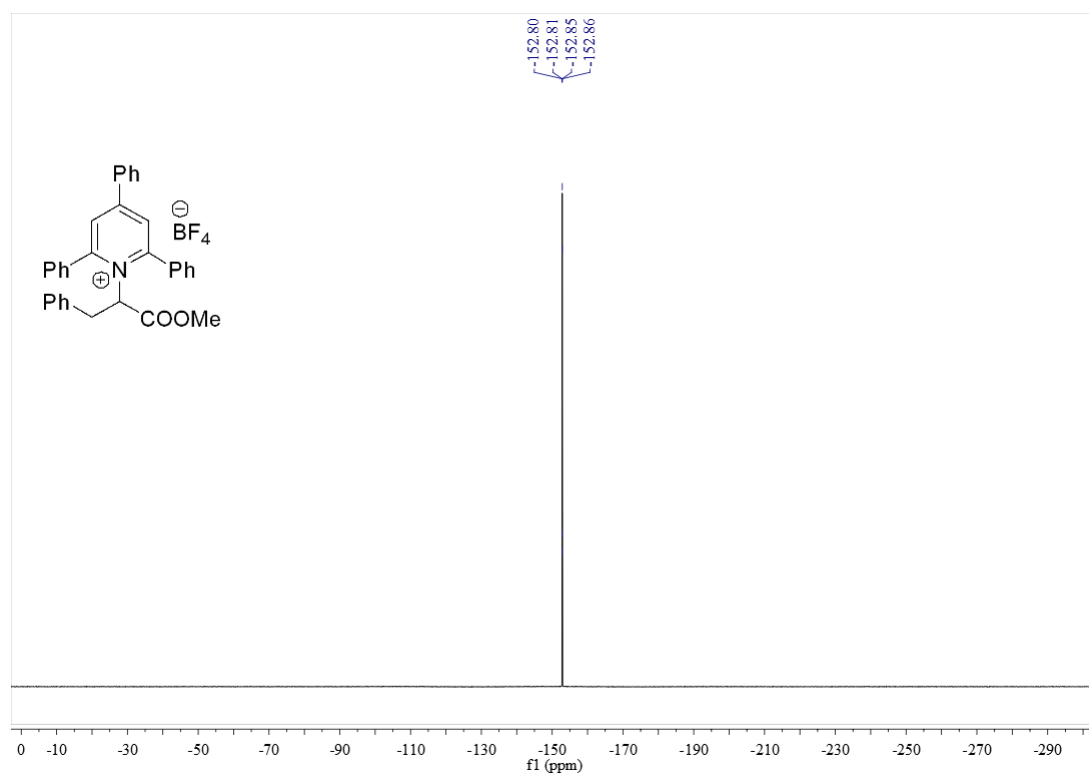

<sup>1</sup>H NMR of **2b**

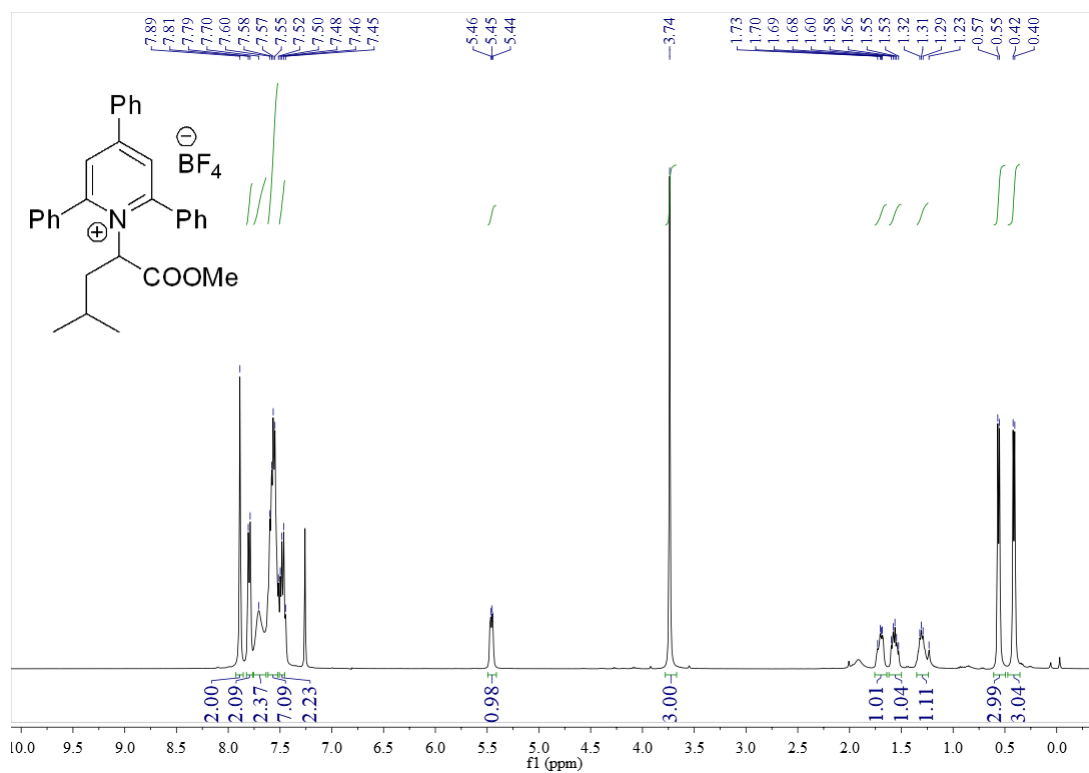

<sup>13</sup>C NMR of **2b**

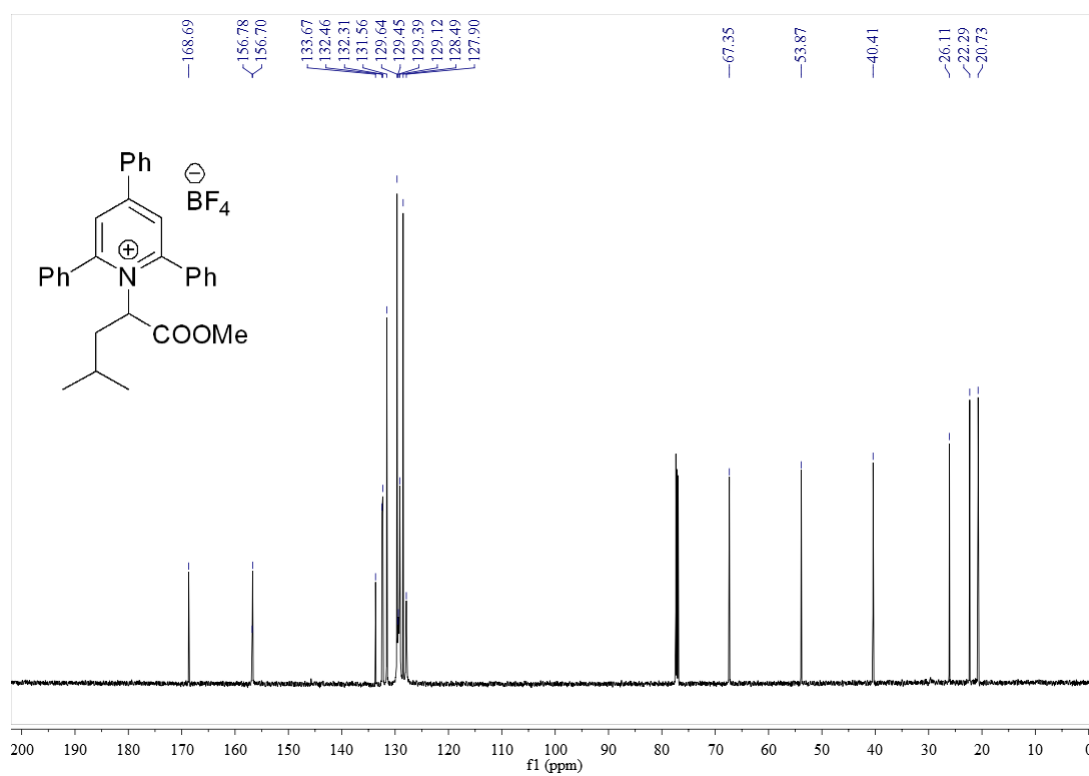

<sup>19</sup>F NMR of **2b**

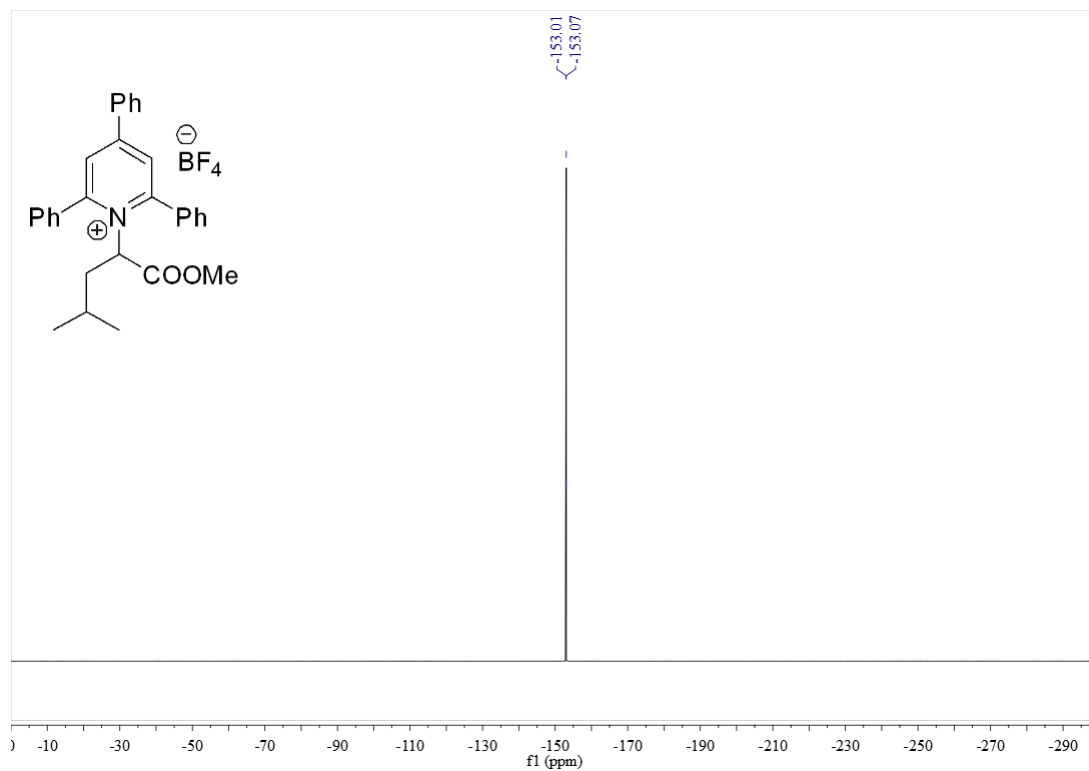

<sup>1</sup>H NMR of **2c**

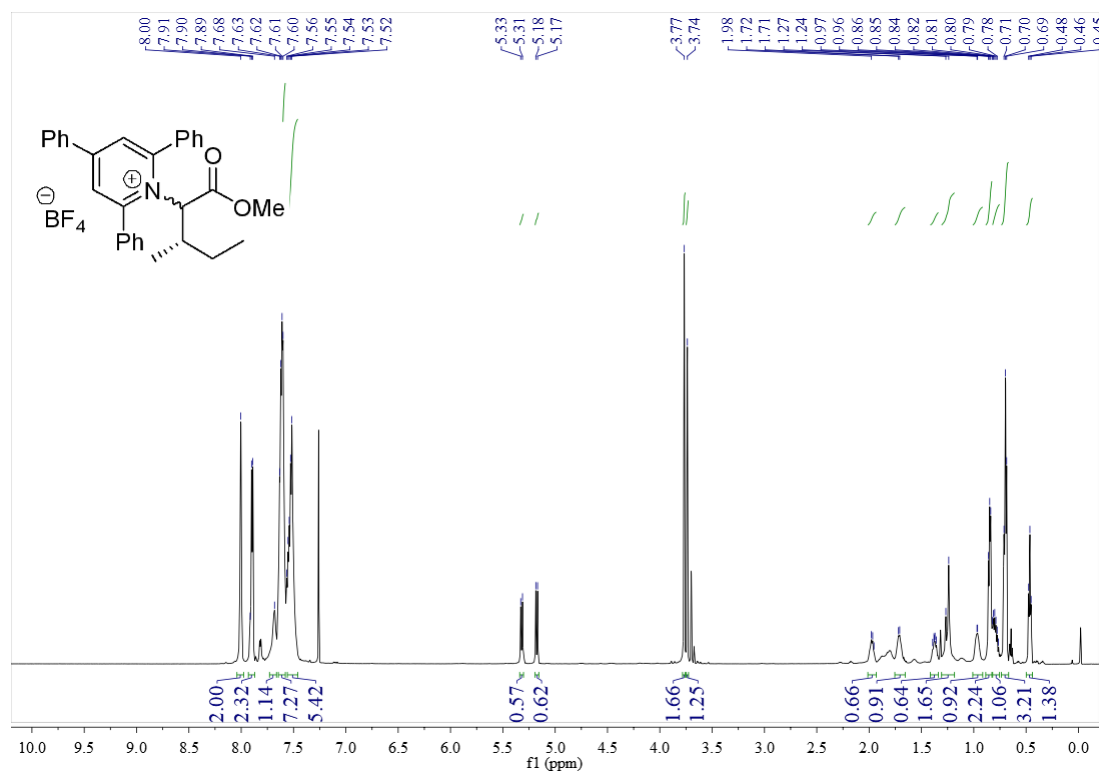

<sup>13</sup>C NMR of **2c**

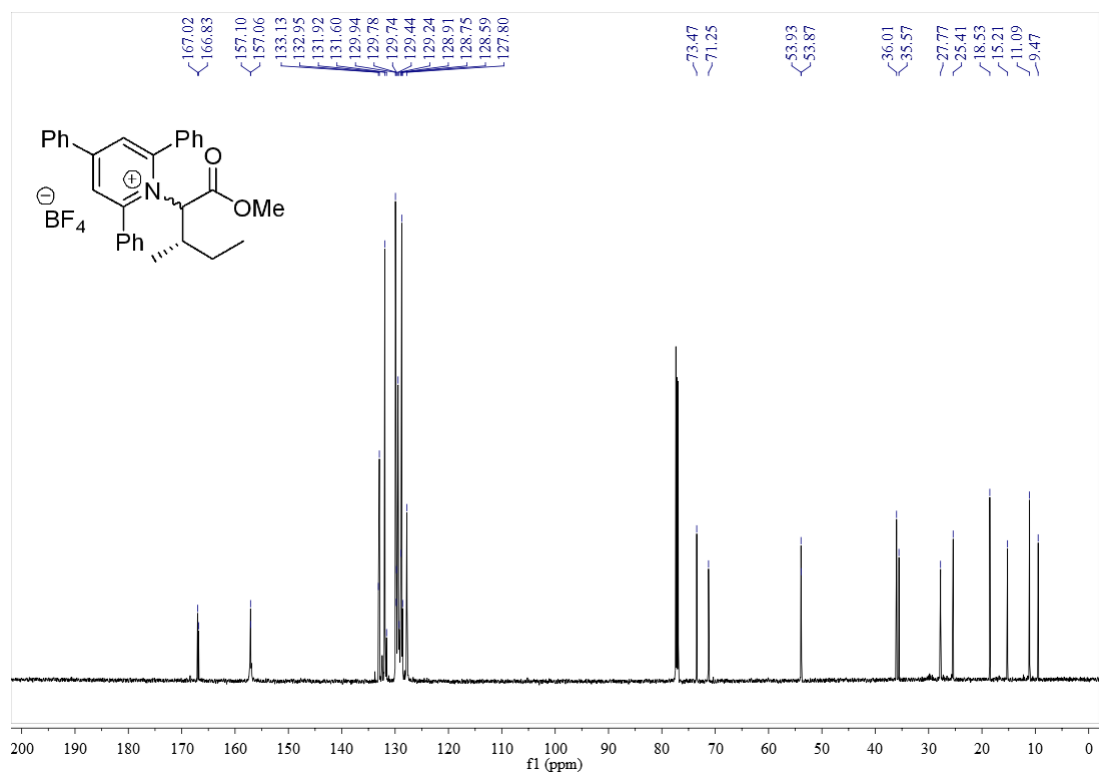

<sup>19</sup>F NMR of **2c**

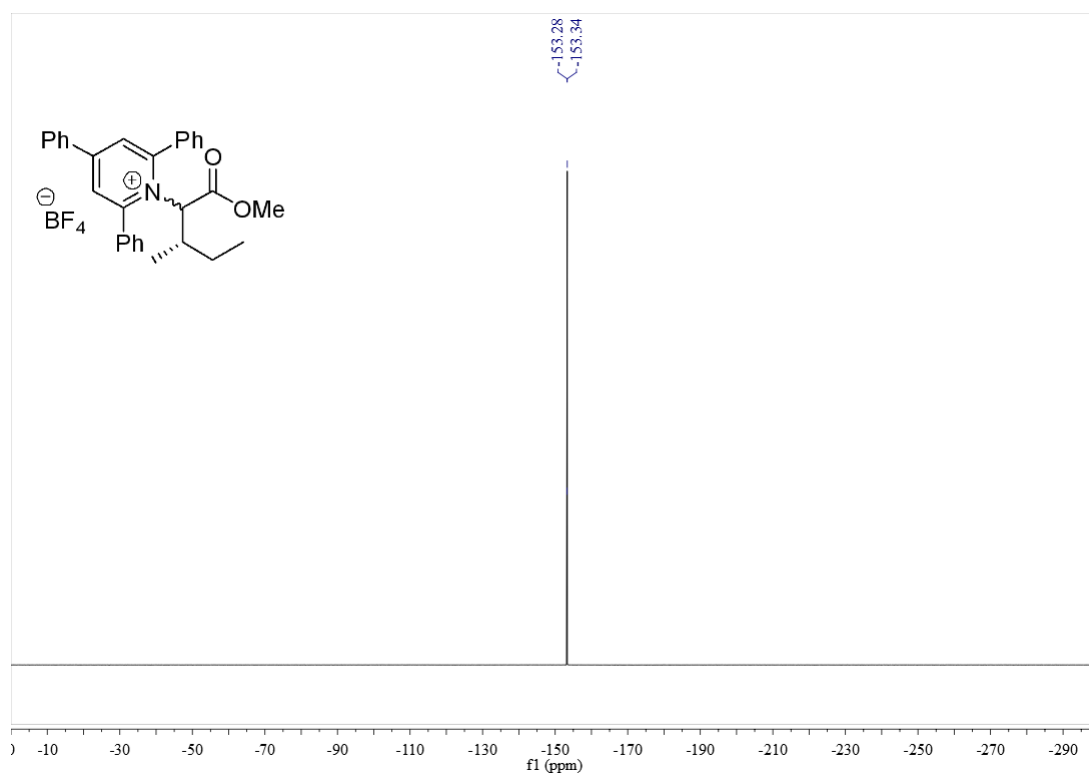

<sup>1</sup>H NMR of **2d**

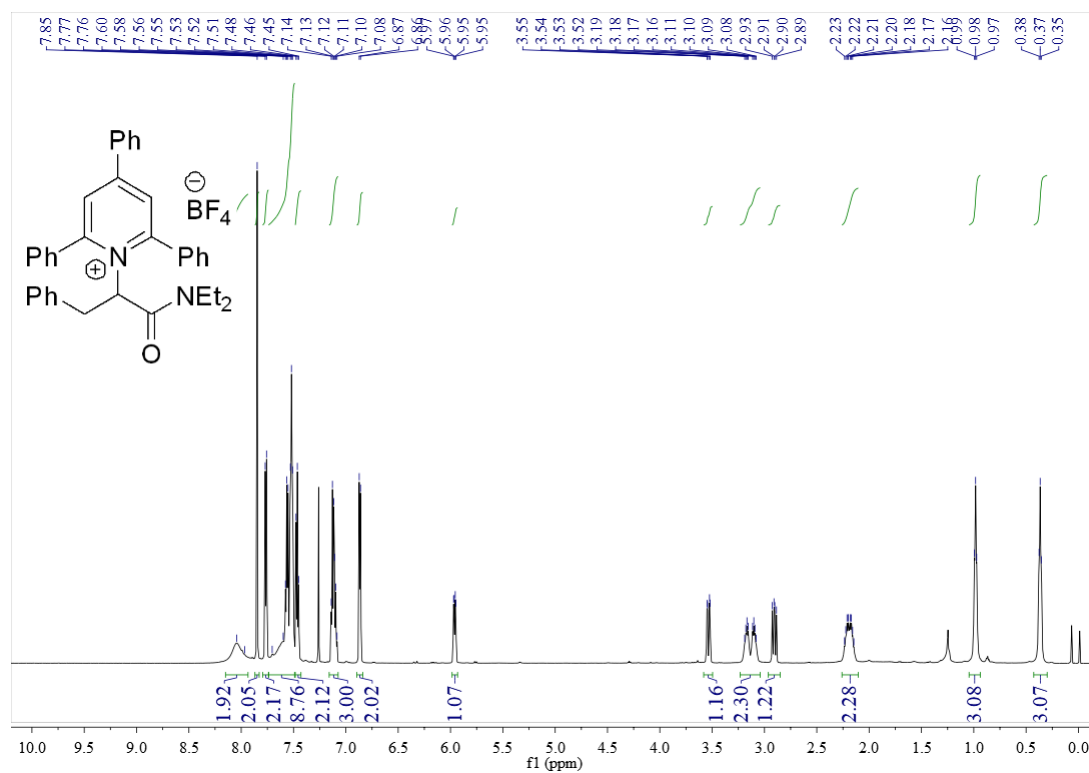

<sup>13</sup>C NMR of **2d**

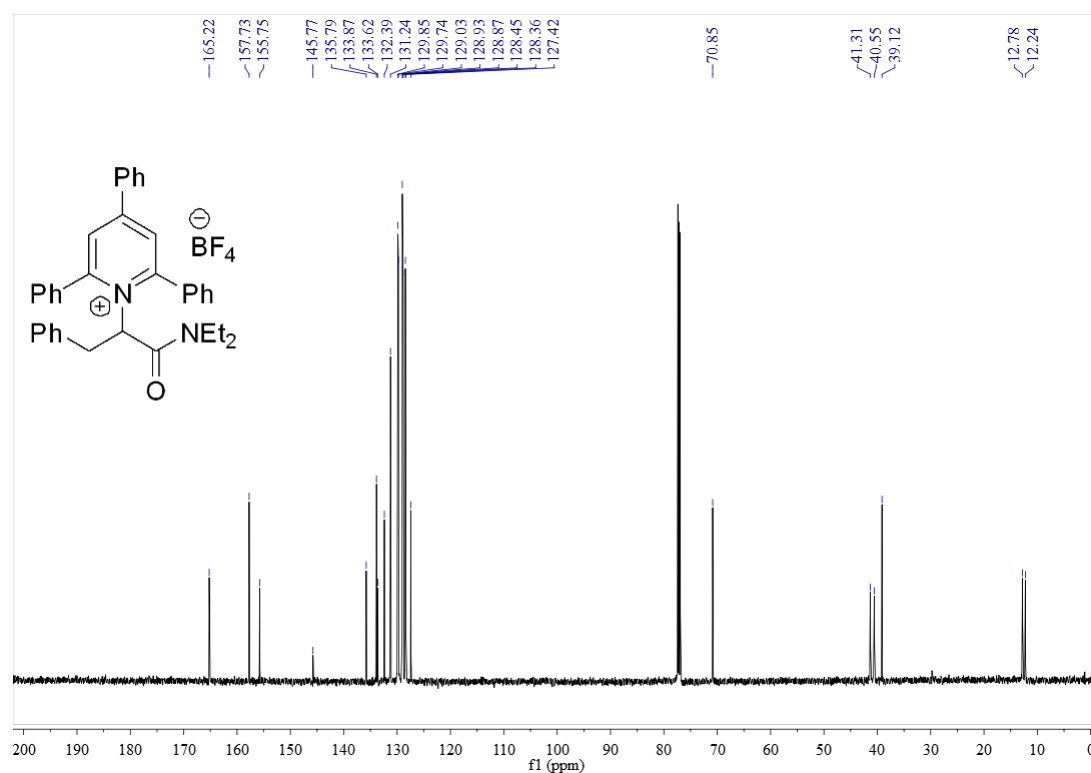

<sup>19</sup>F NMR of **2d**

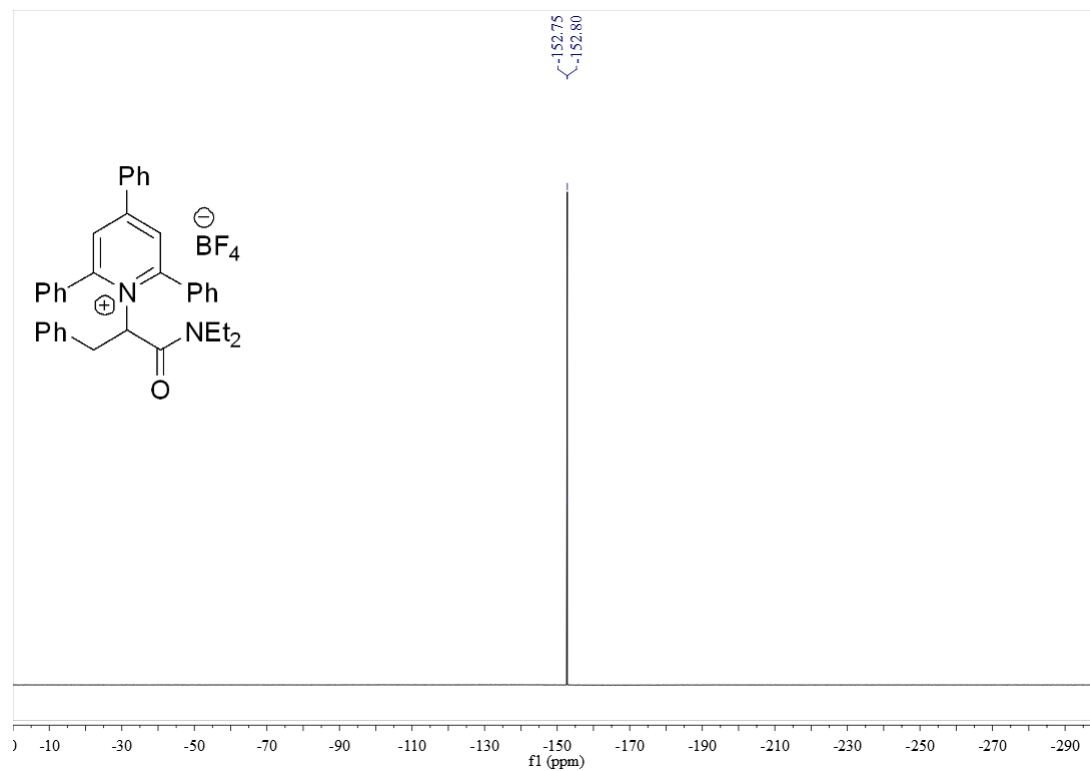

<sup>1</sup>H NMR of **2e**

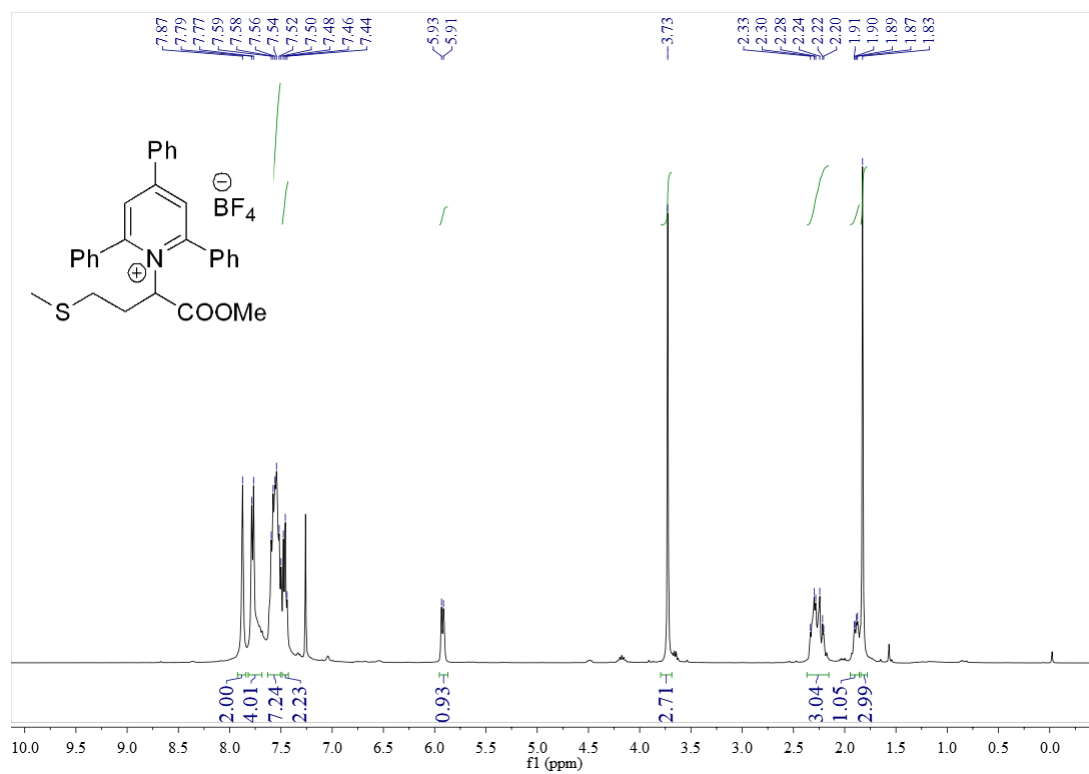

<sup>13</sup>C NMR of **2e**

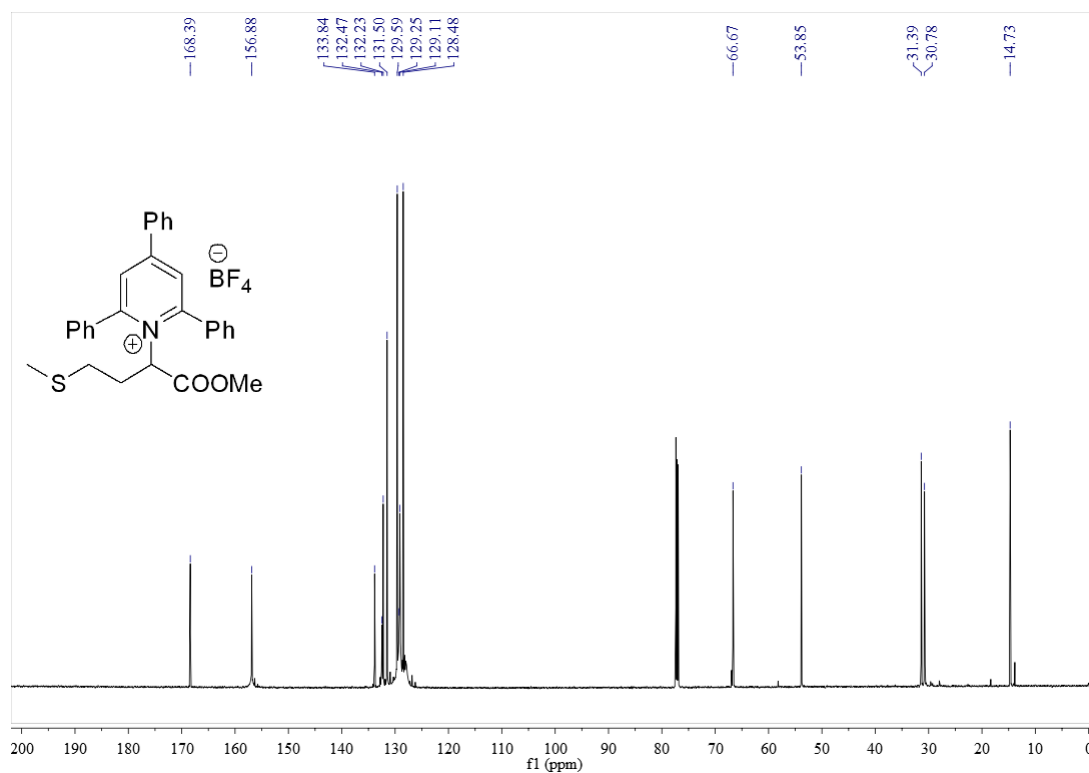

<sup>19</sup>F NMR of **2e**

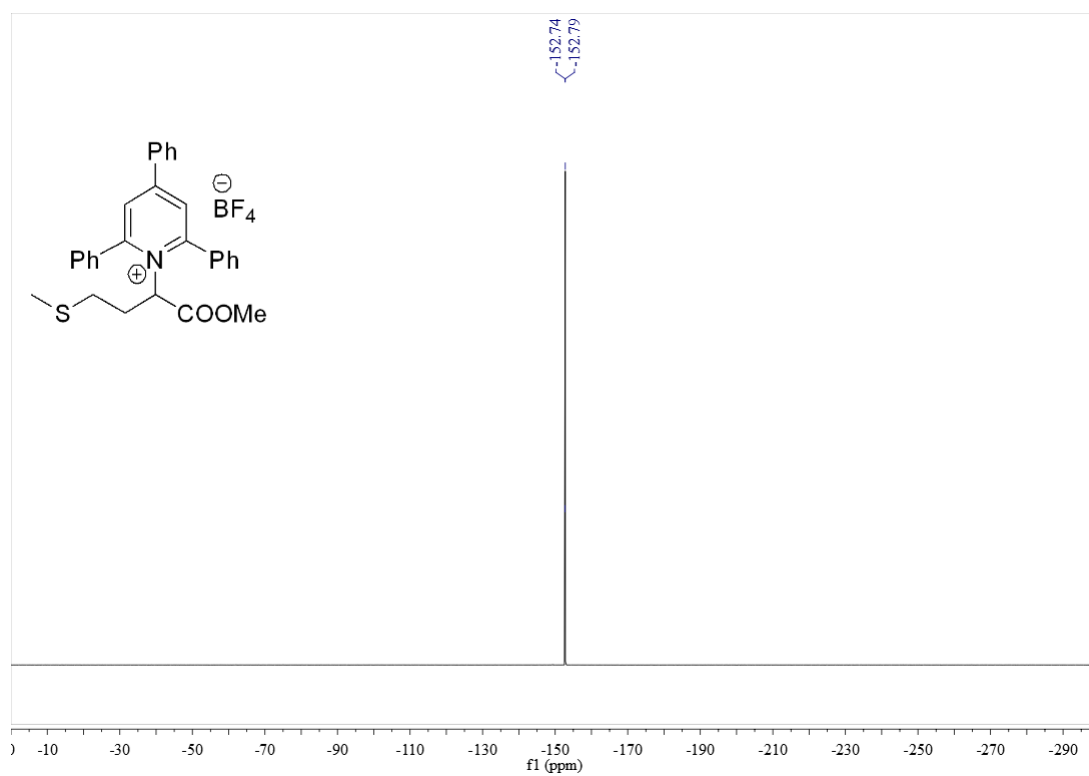

<sup>1</sup>H NMR of **2f**

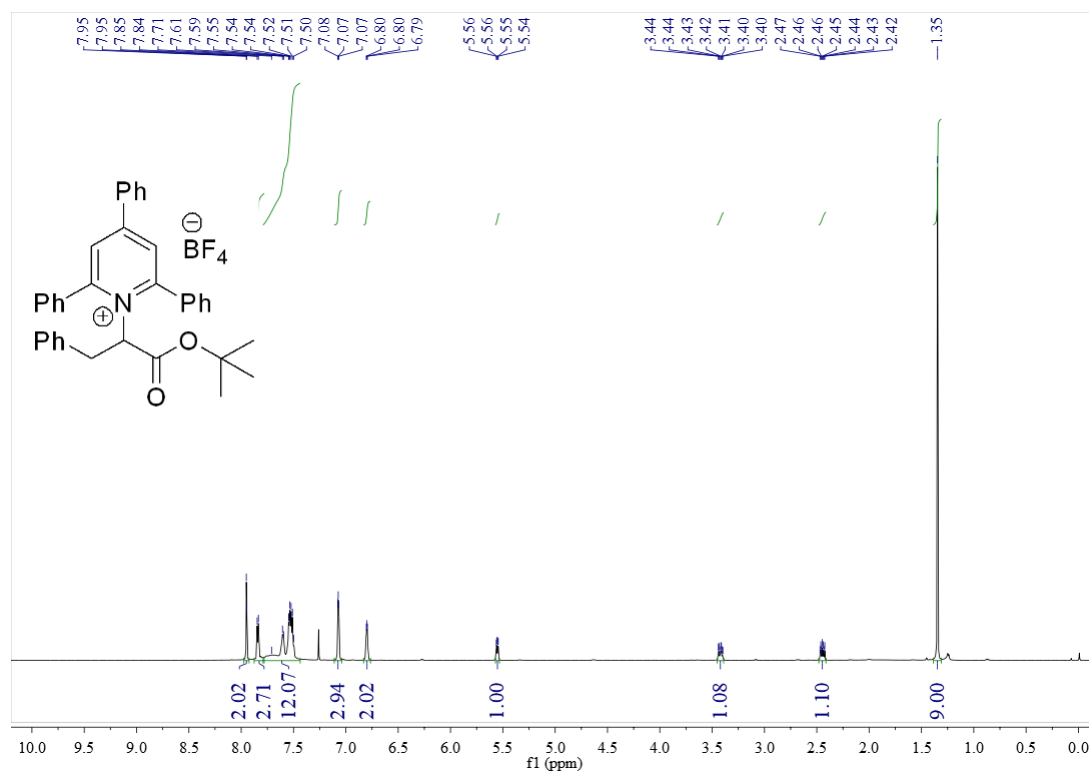

<sup>13</sup>C NMR of **2f**

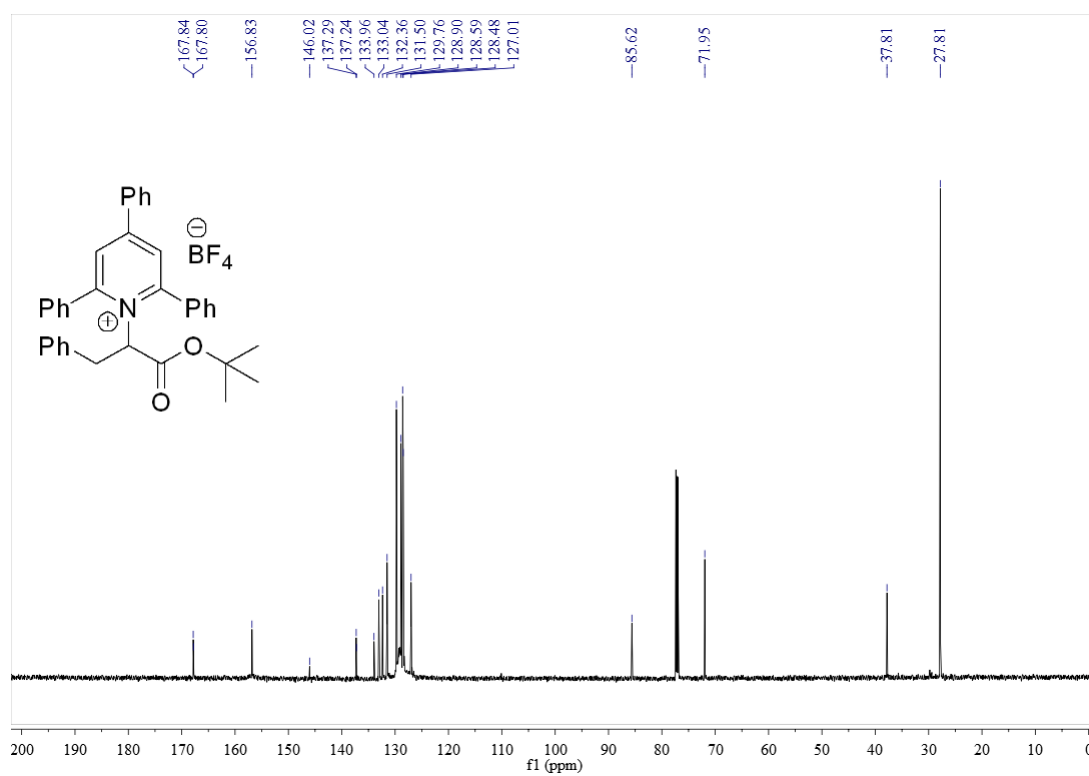

<sup>19</sup>F NMR of **2f**

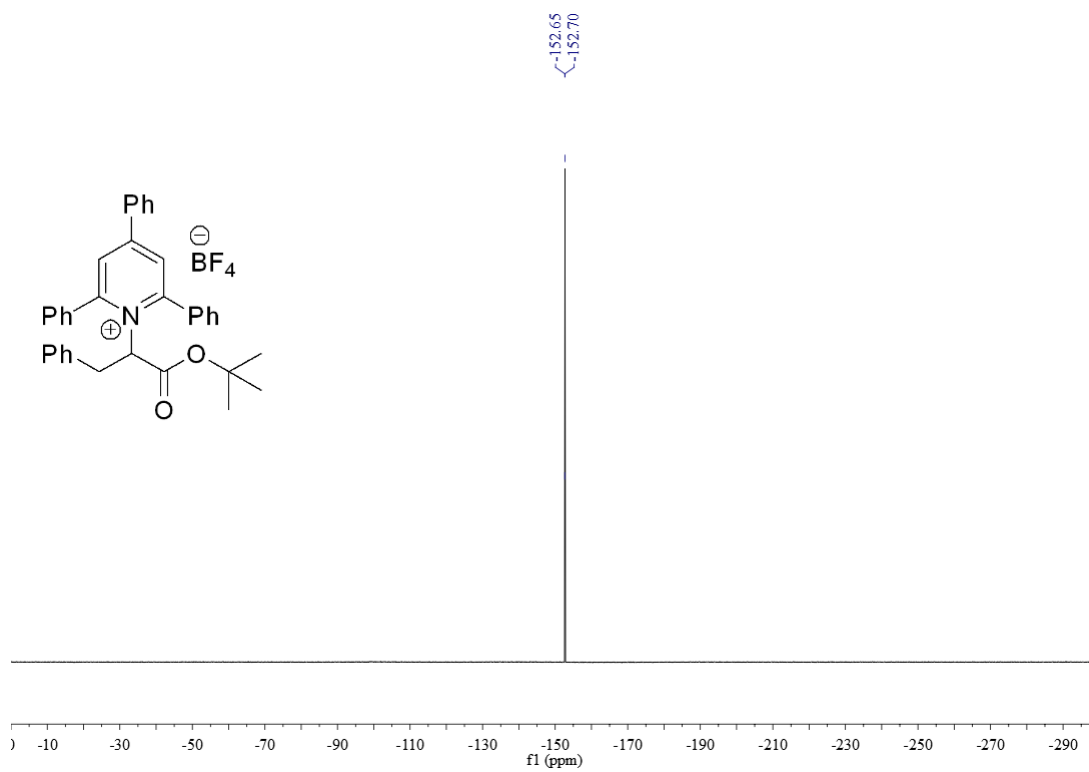

$^1\text{H}$  NMR of **2g**

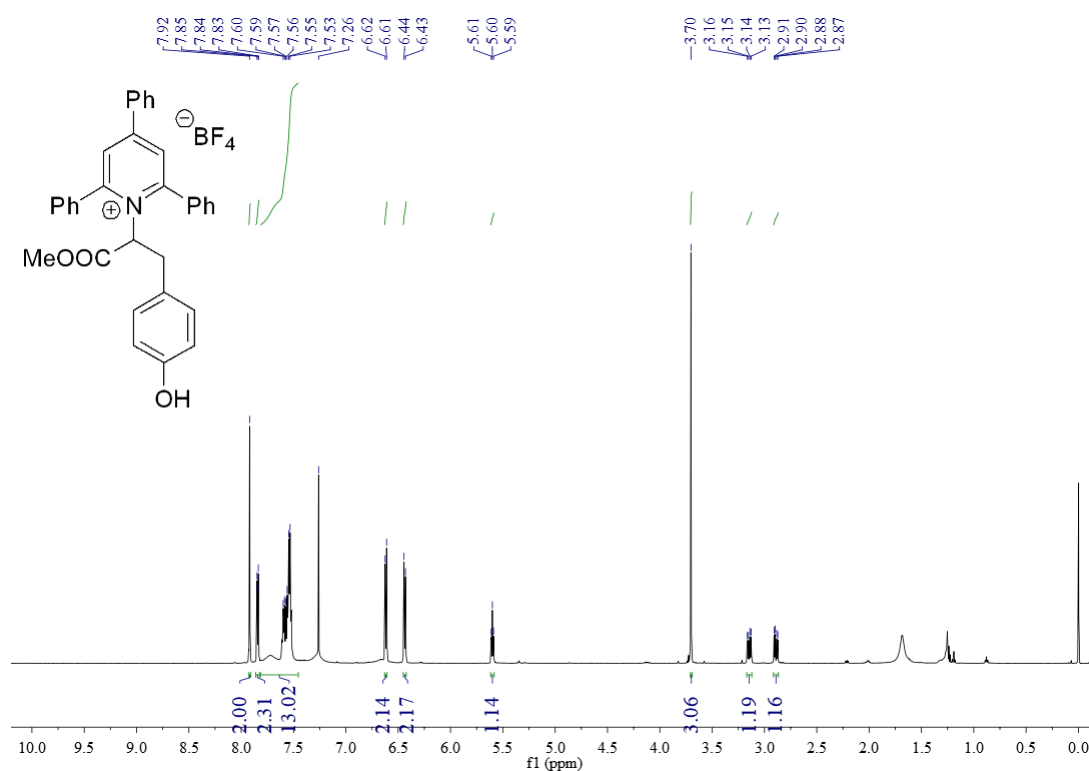

$^{13}\text{C}$  NMR of **2g**

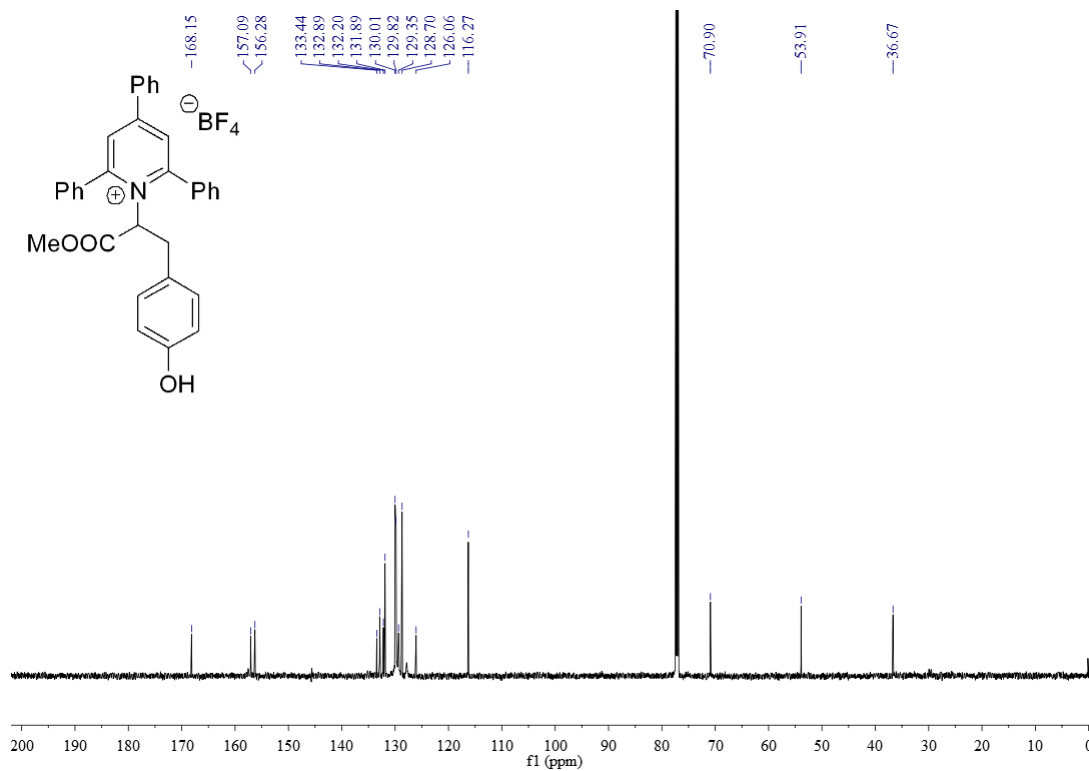

<sup>19</sup>F NMR of **2g**

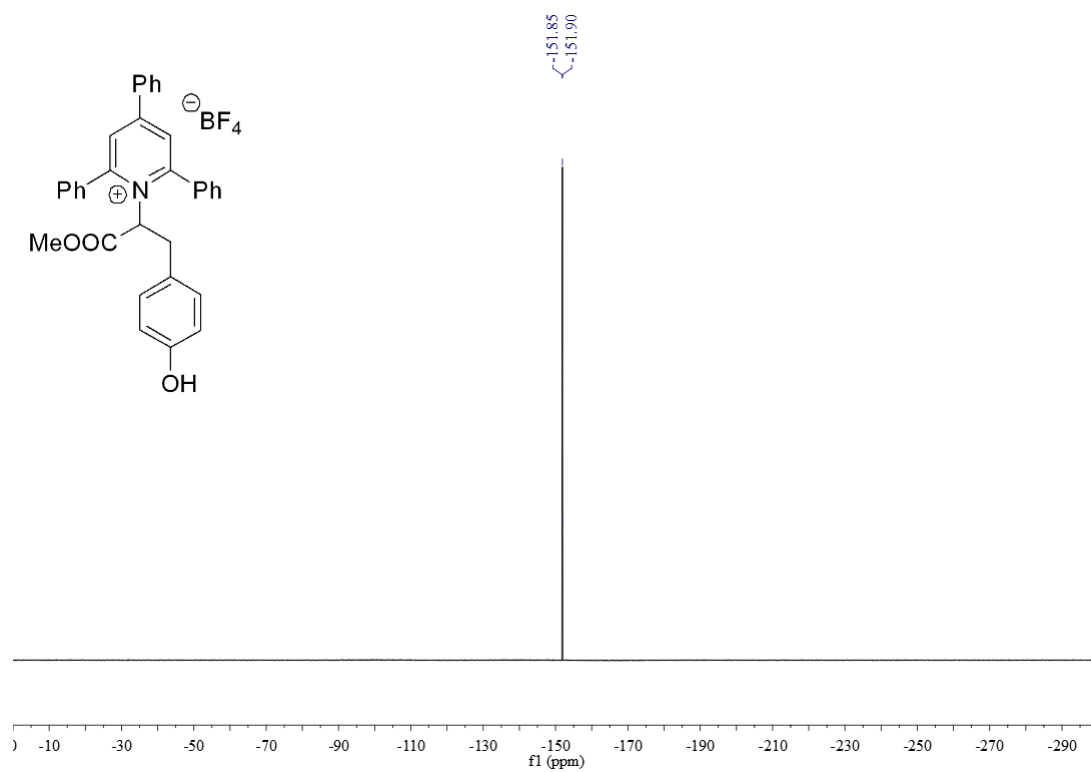

<sup>1</sup>H NMR of **2h**

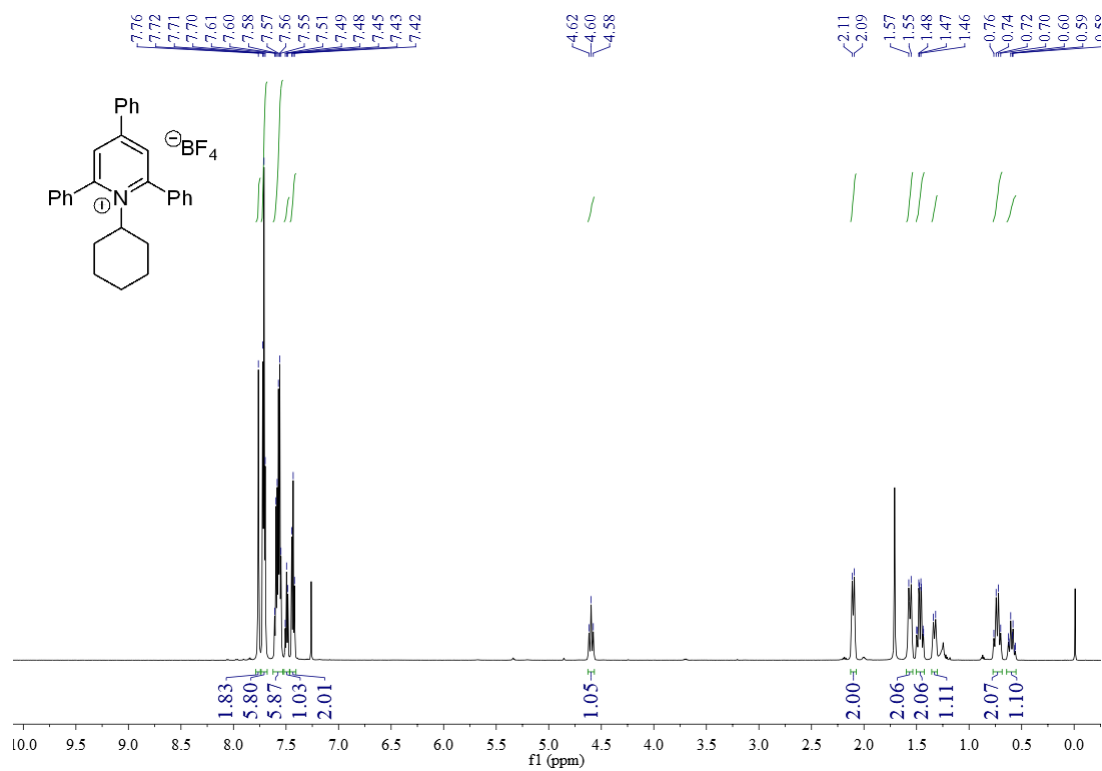

<sup>13</sup>C NMR of **2h**

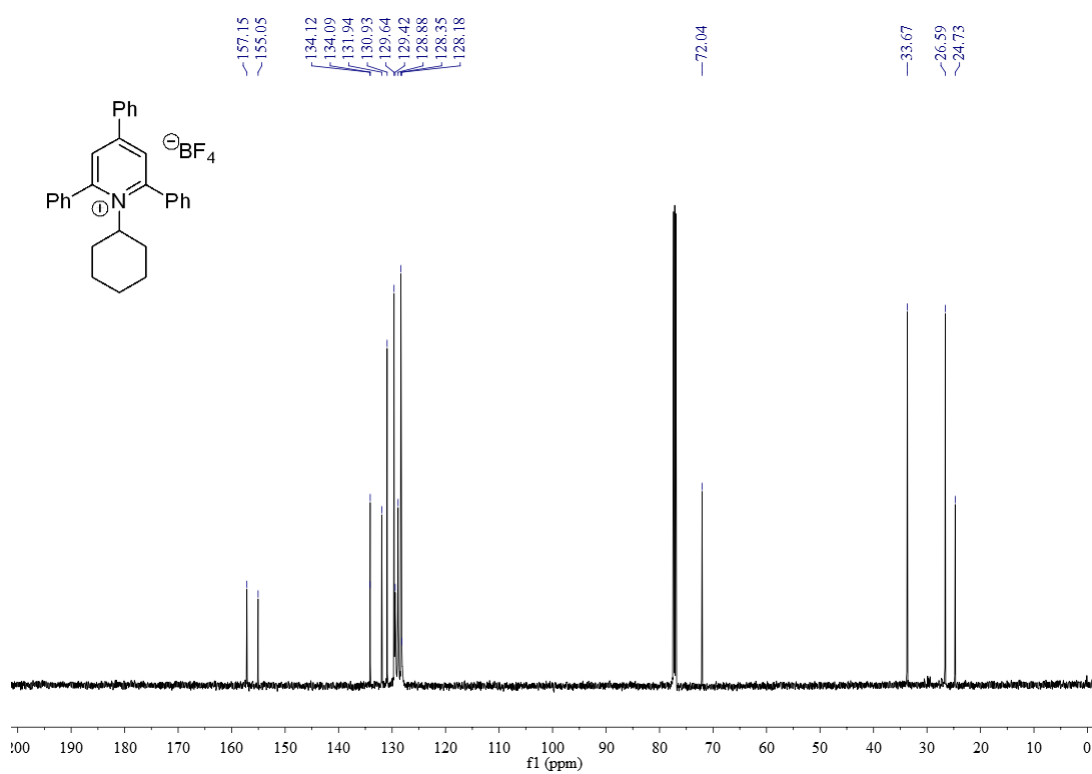

<sup>19</sup>F NMR of **2h**

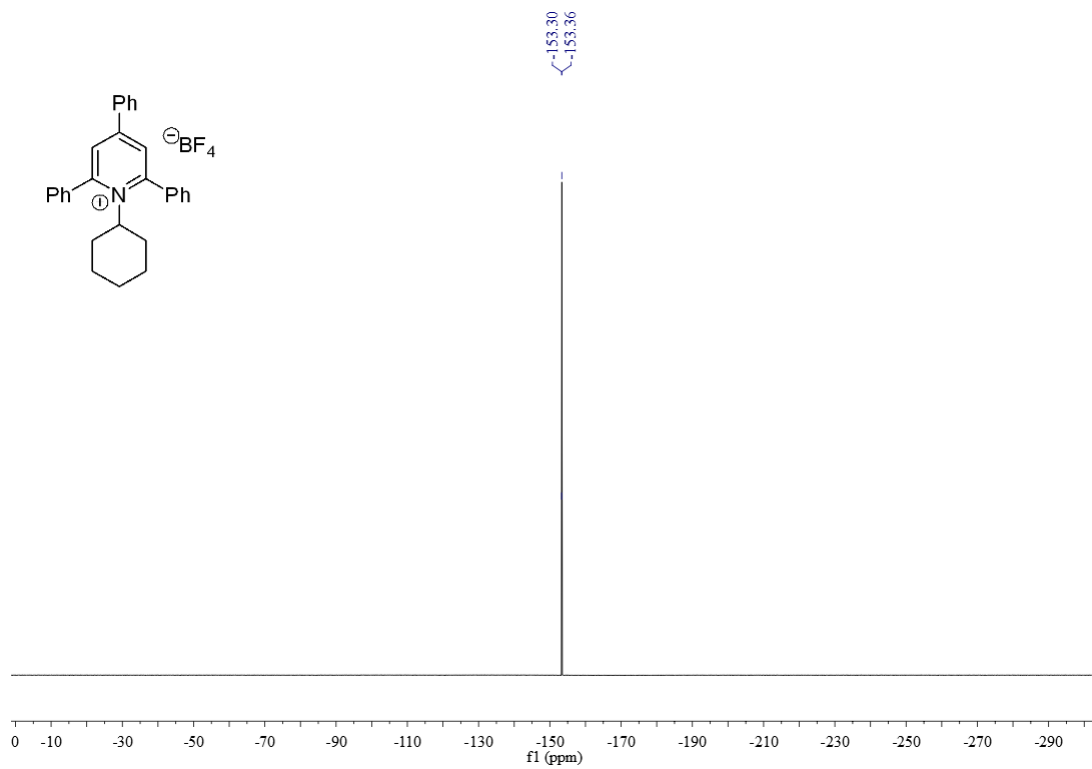

<sup>1</sup>H NMR of **2i**

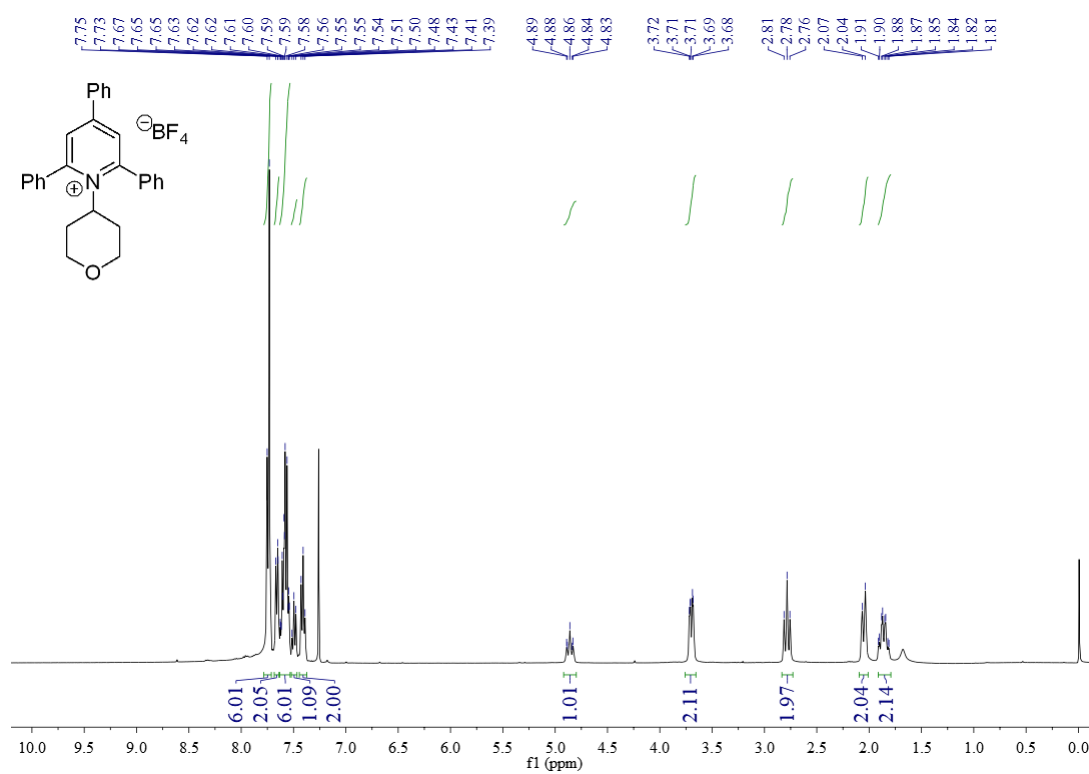

<sup>13</sup>C NMR of **2i**

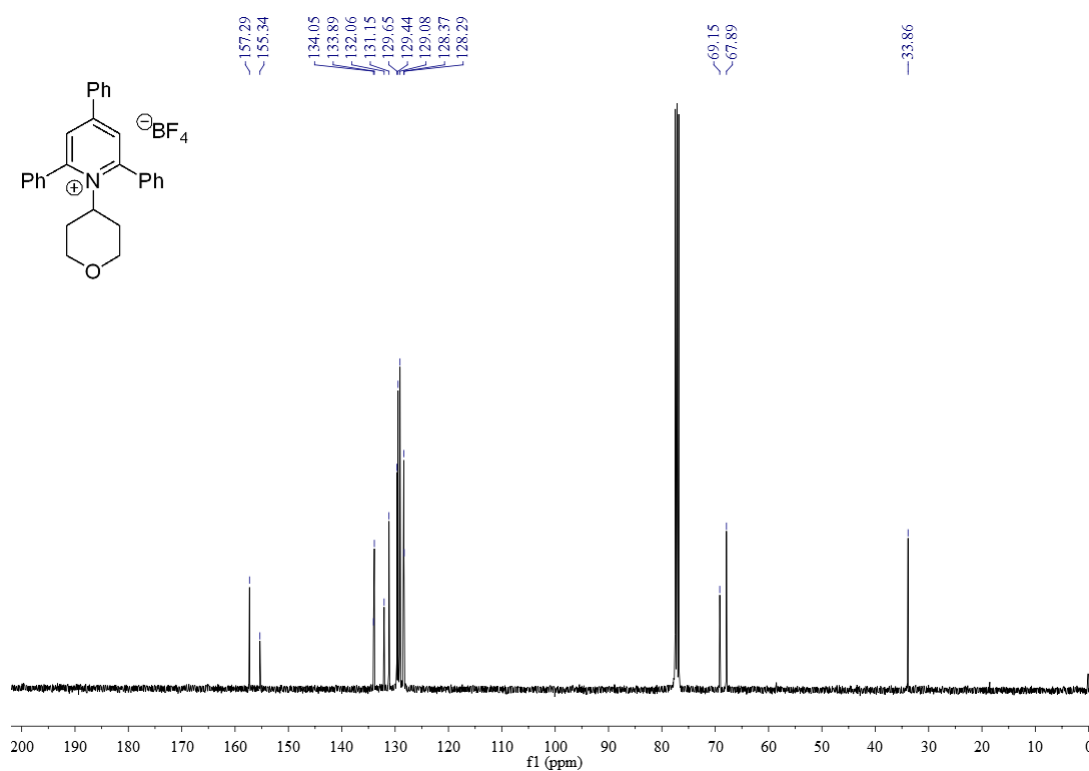

<sup>19</sup>F NMR of **2i**

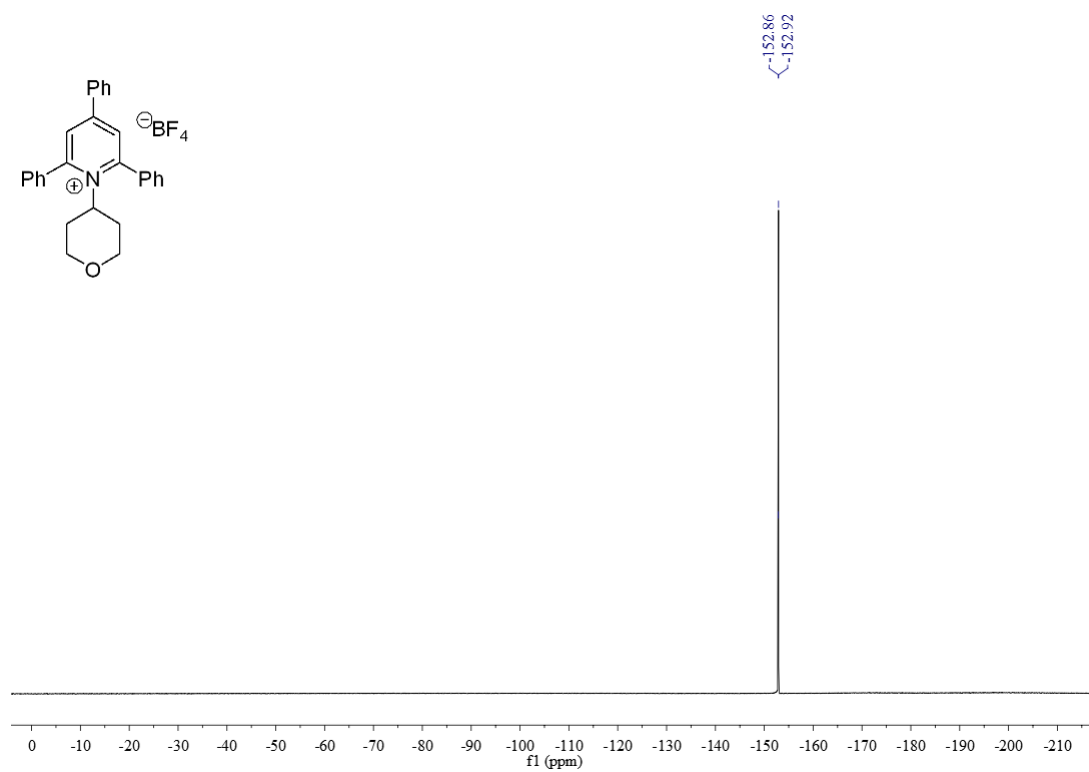

<sup>1</sup>H NMR of **2j**

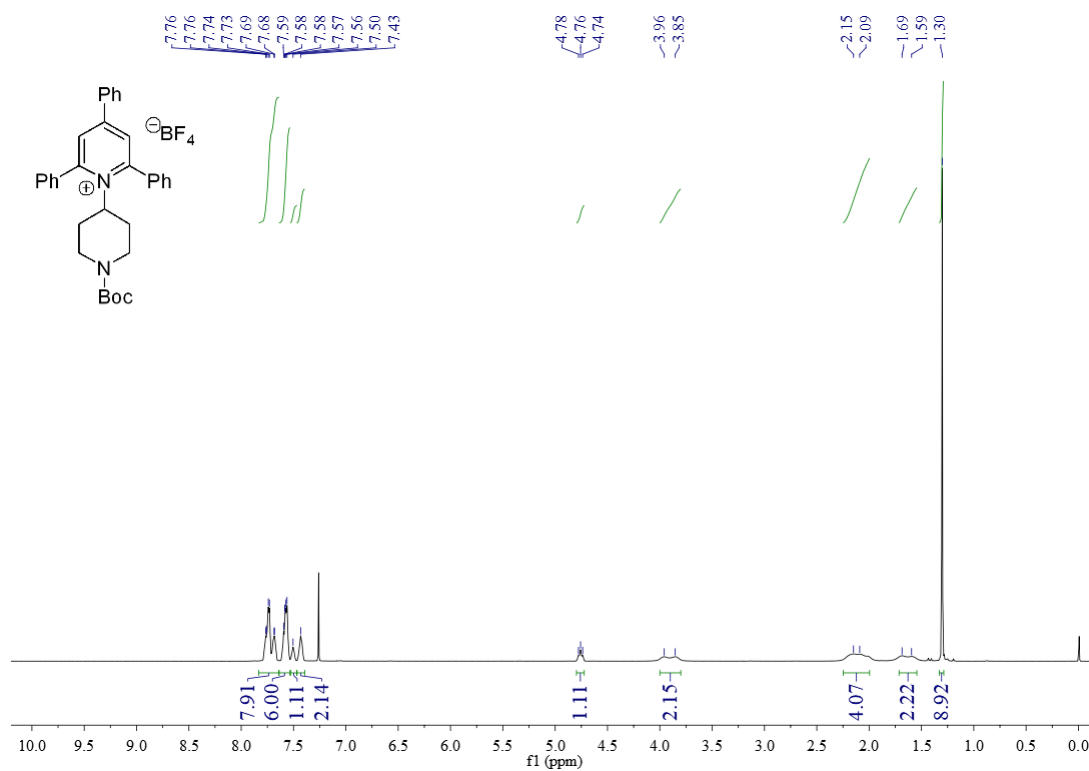

# <sup>13</sup>C NMR of **2j**

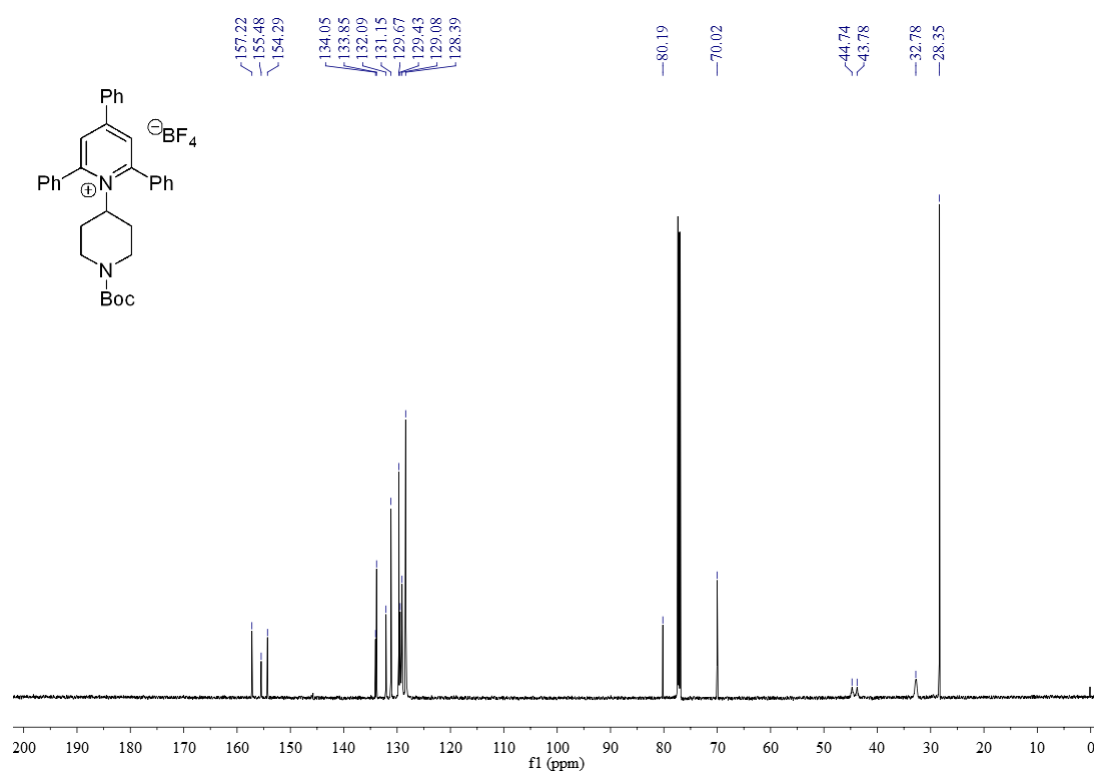

# <sup>19</sup>F NMR of **2j**

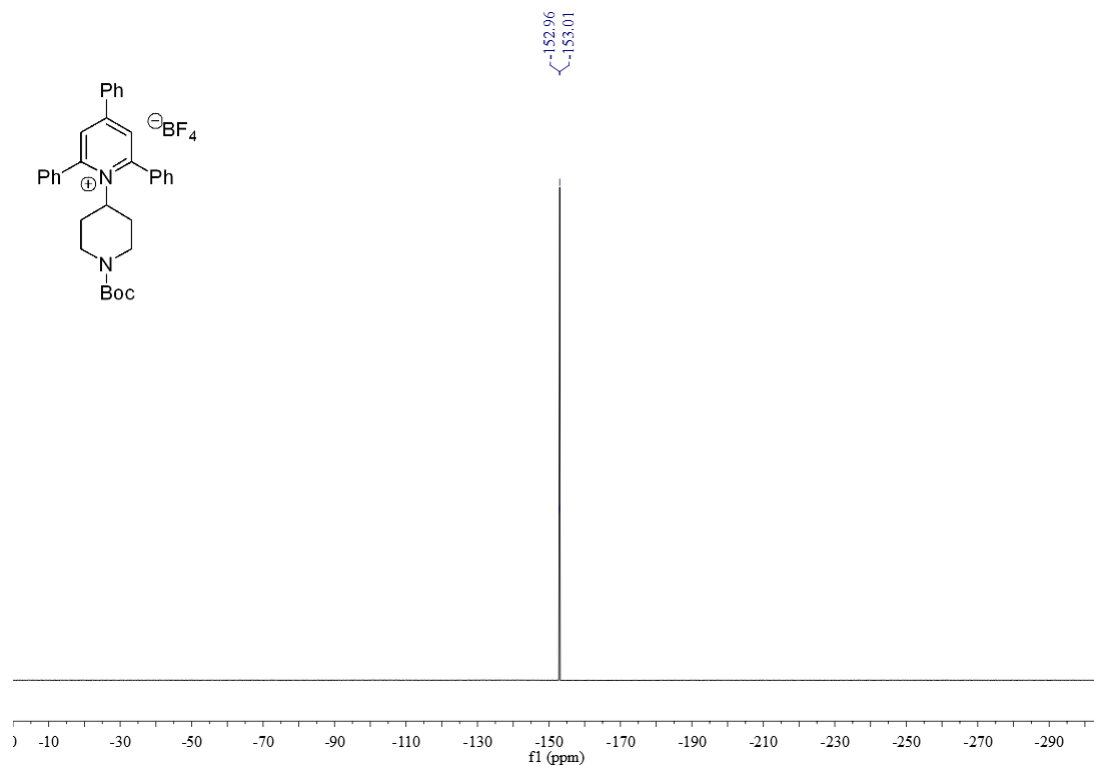

<sup>1</sup>H NMR of **2k**

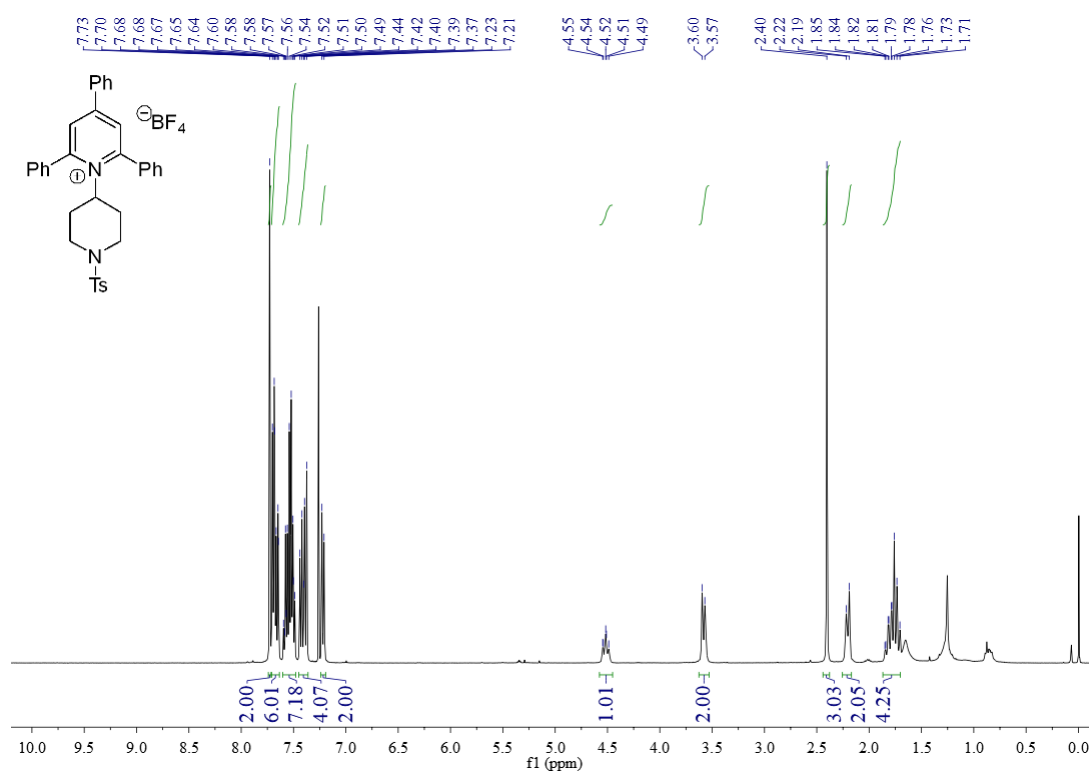

<sup>13</sup>C NMR of **2k**

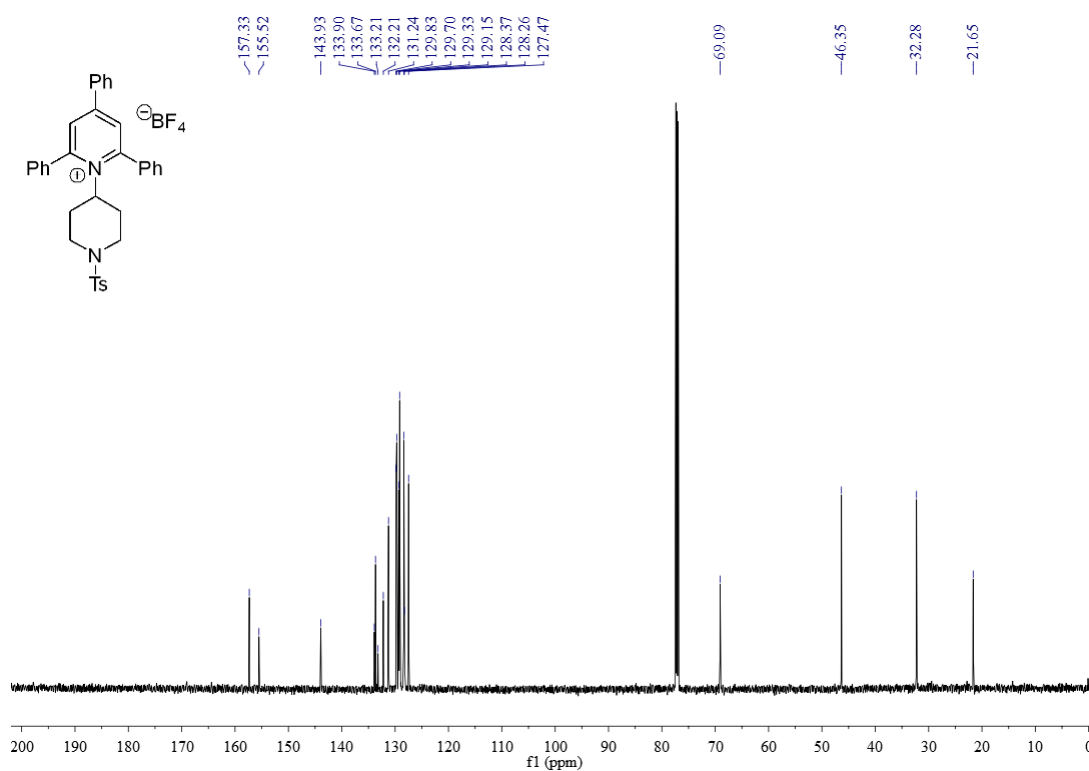

<sup>19</sup>F NMR of **2k**

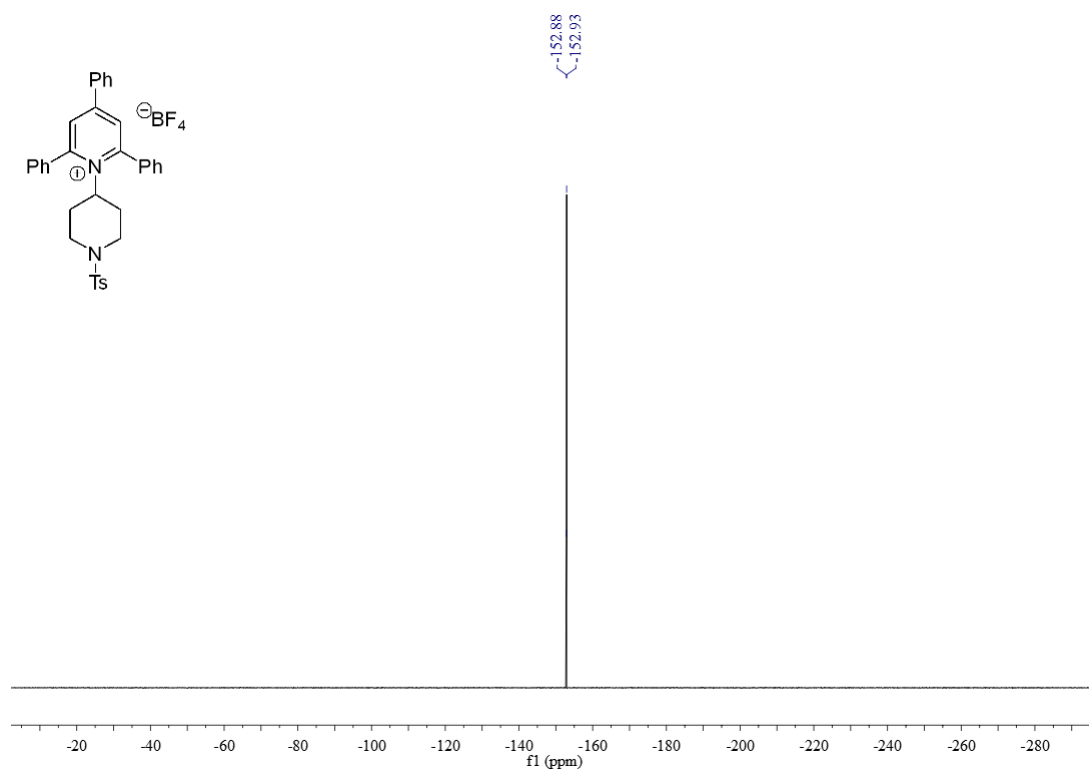

<sup>1</sup>H NMR of **2l**

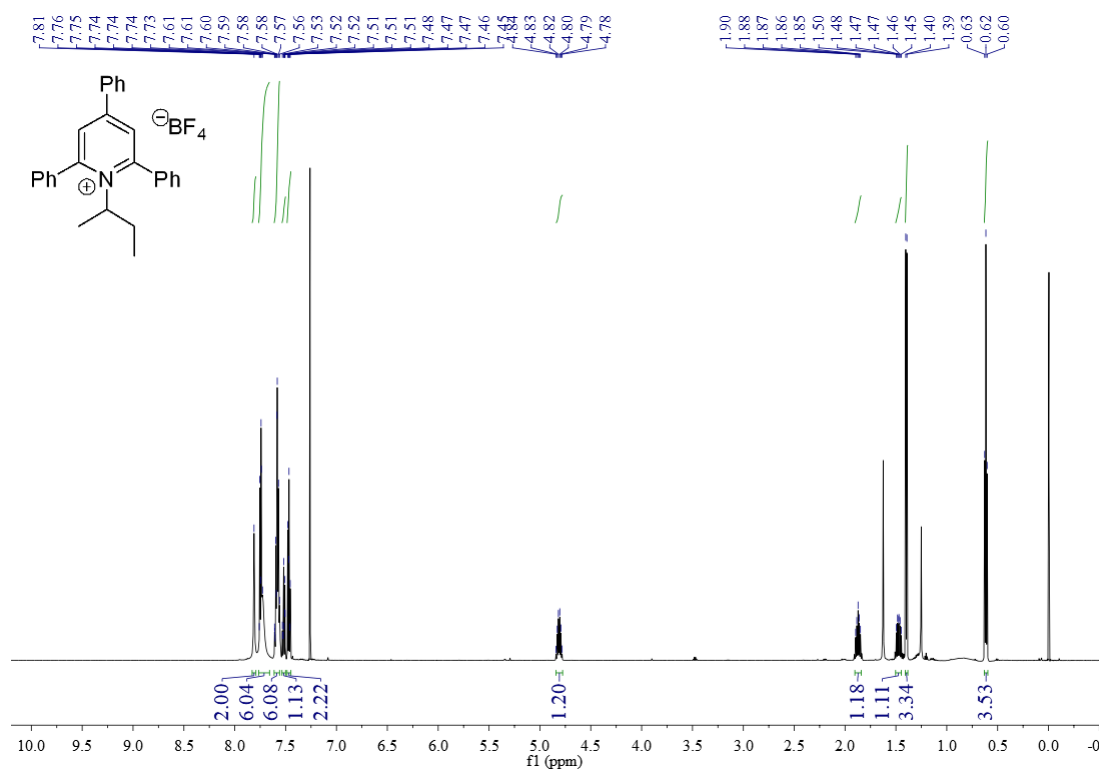

<sup>13</sup>C NMR of **2l**

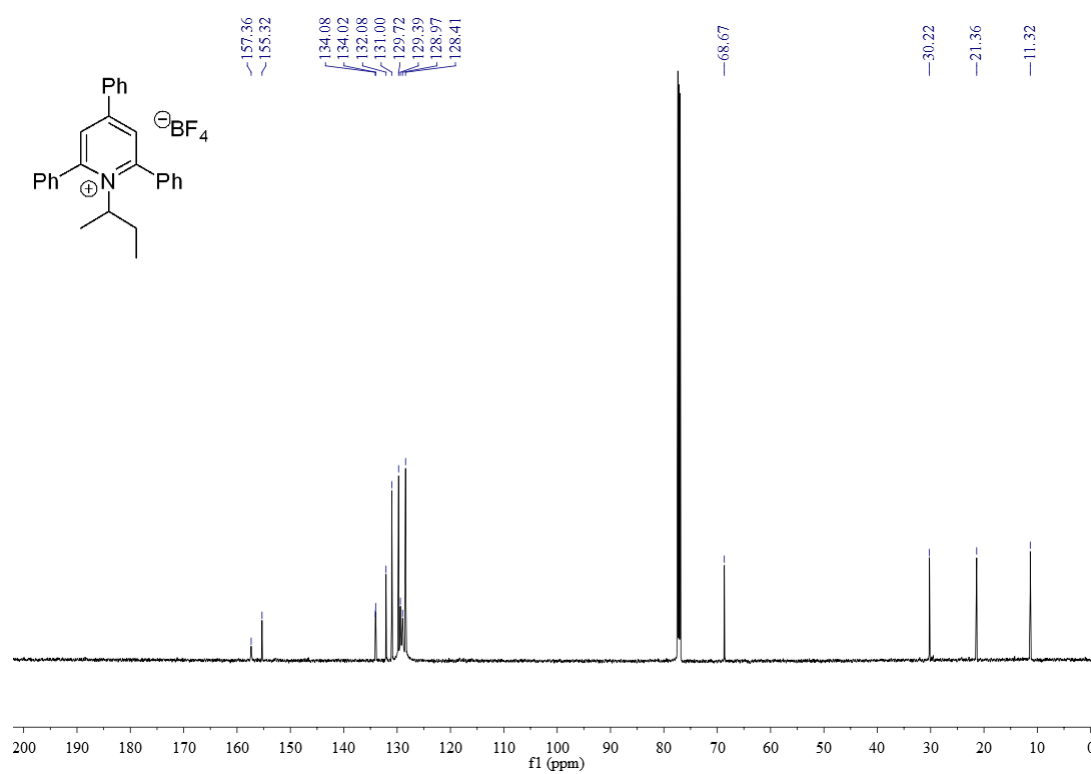

<sup>19</sup>F NMR of **2l**

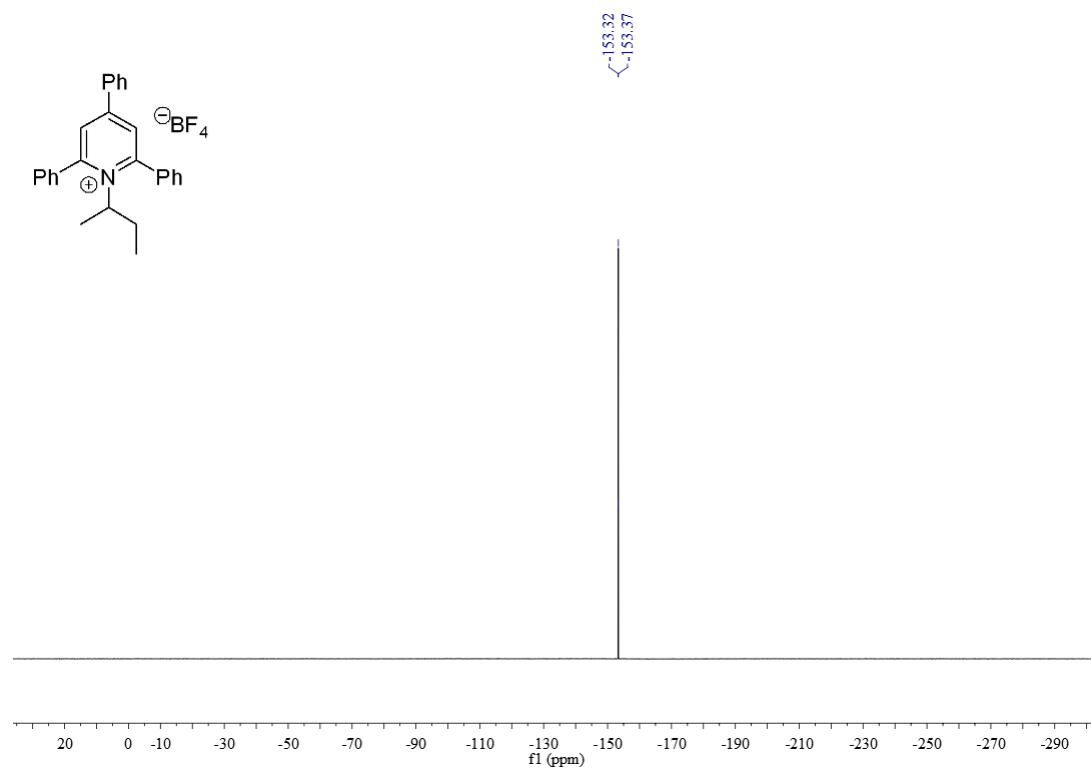

# <sup>1</sup>H NMR of **2m**

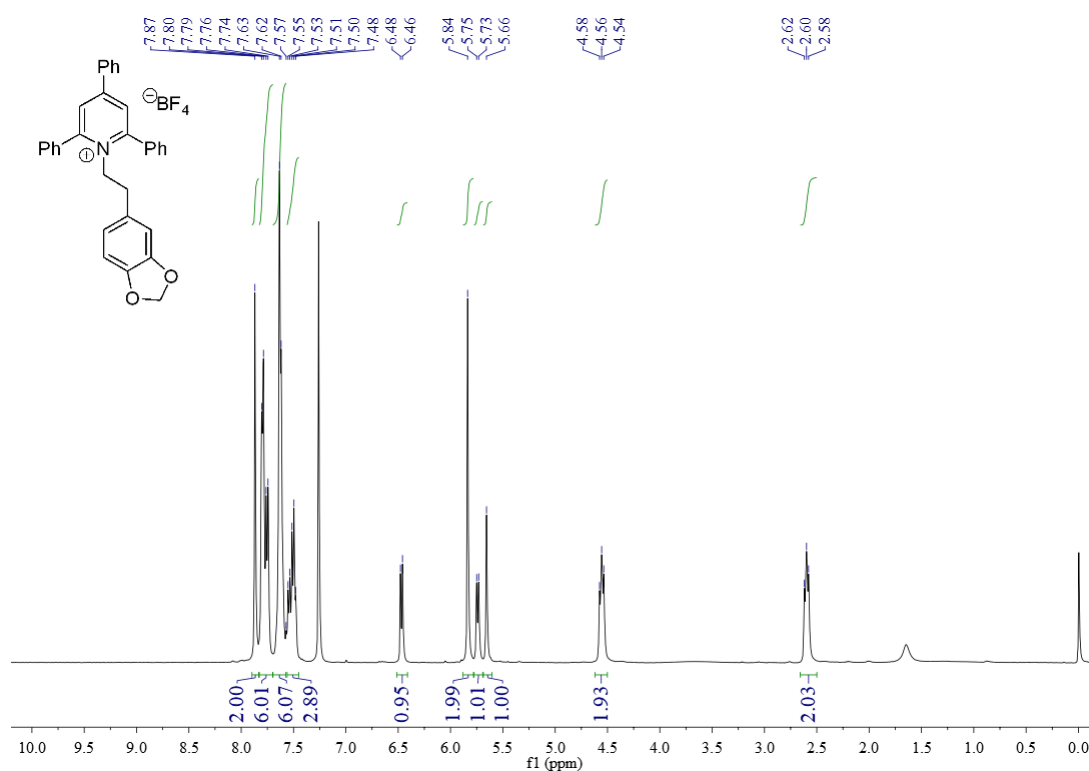

# <sup>13</sup>C NMR of **2m**

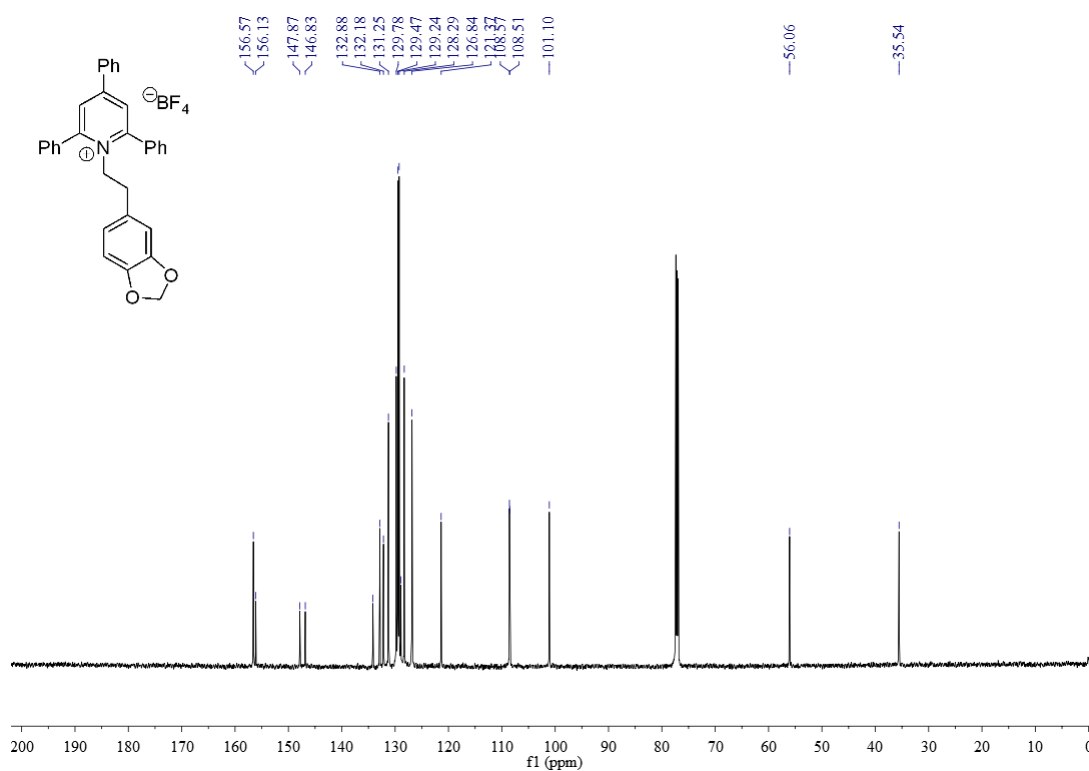

<sup>19</sup>F NMR of **2m**

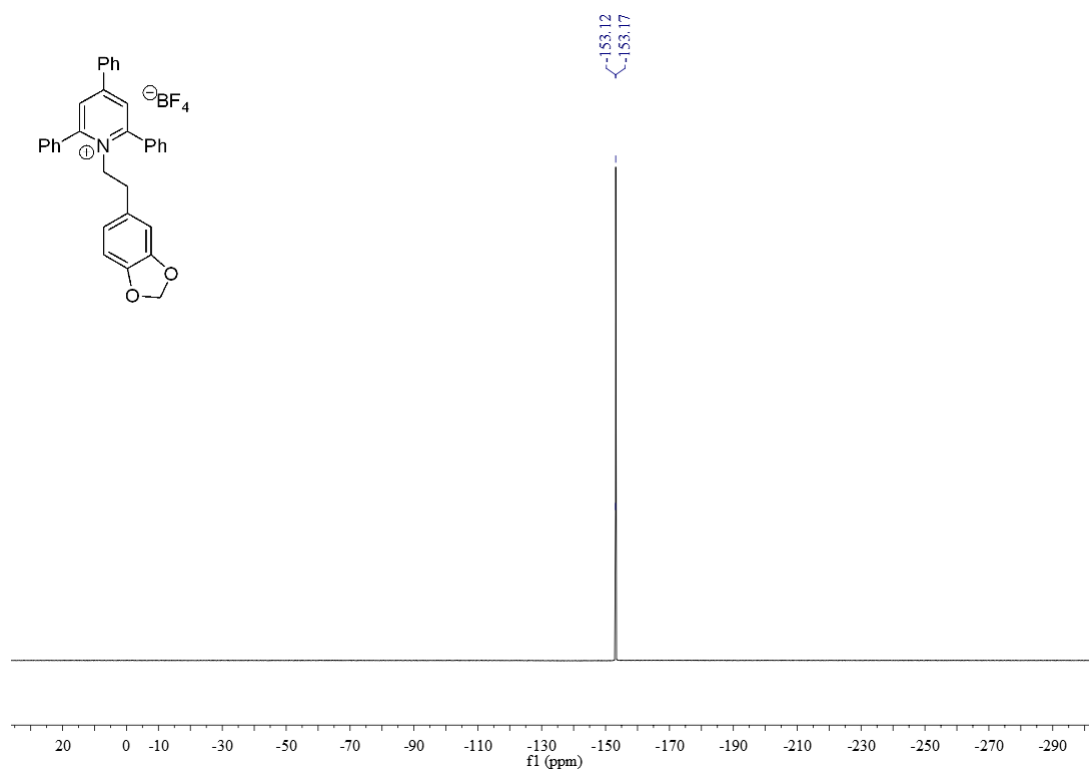

<sup>1</sup>H NMR of **3a**

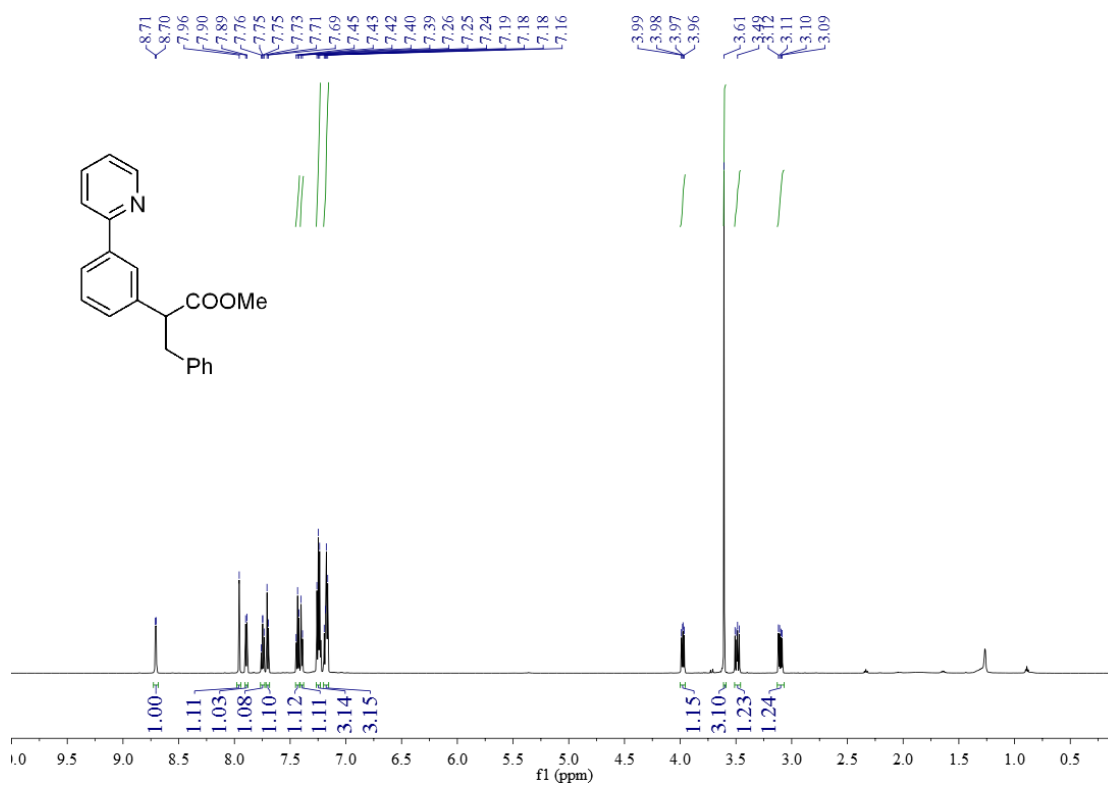

<sup>13</sup>C NMR of **3a**

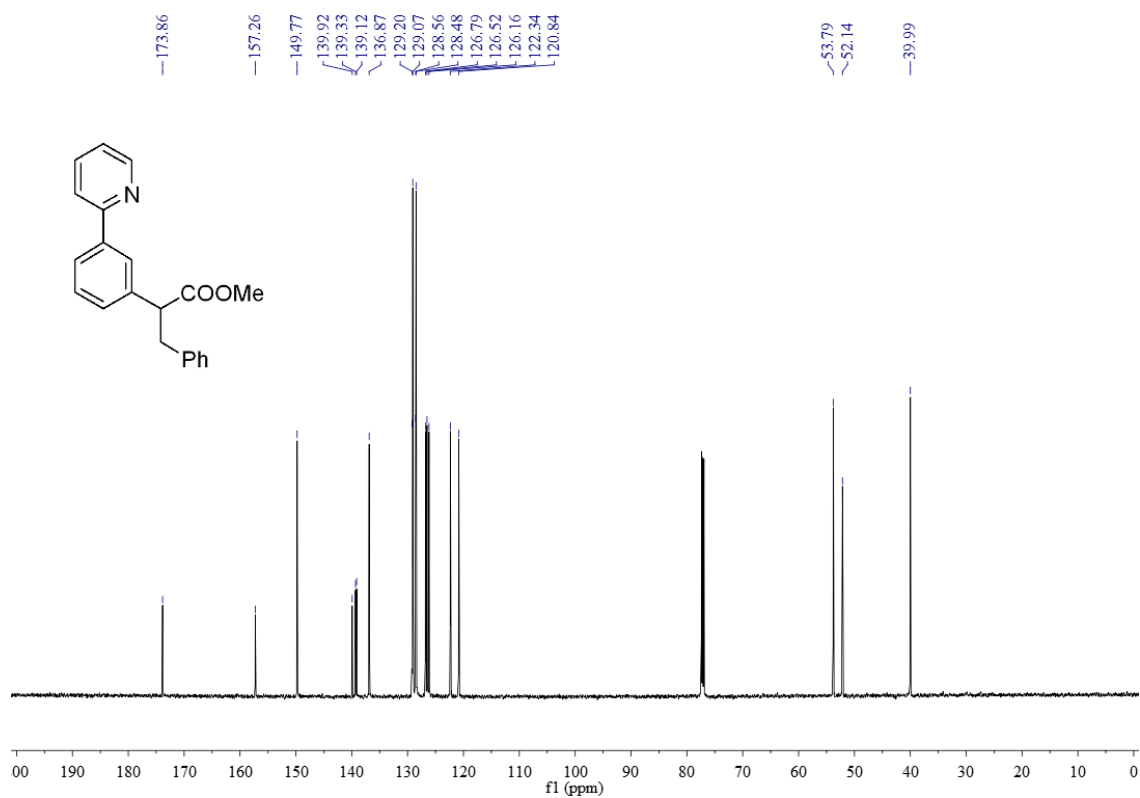

<sup>1</sup>H NMR of **3b**

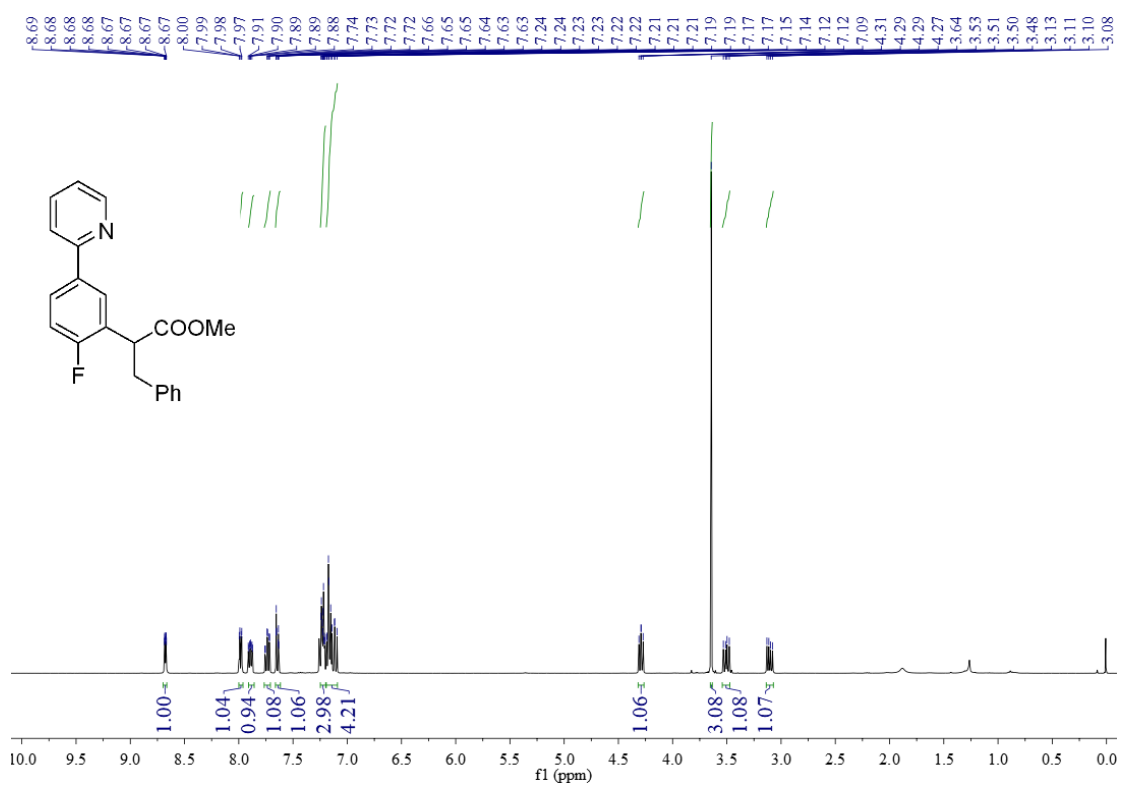

<sup>13</sup>C NMR of **3b**

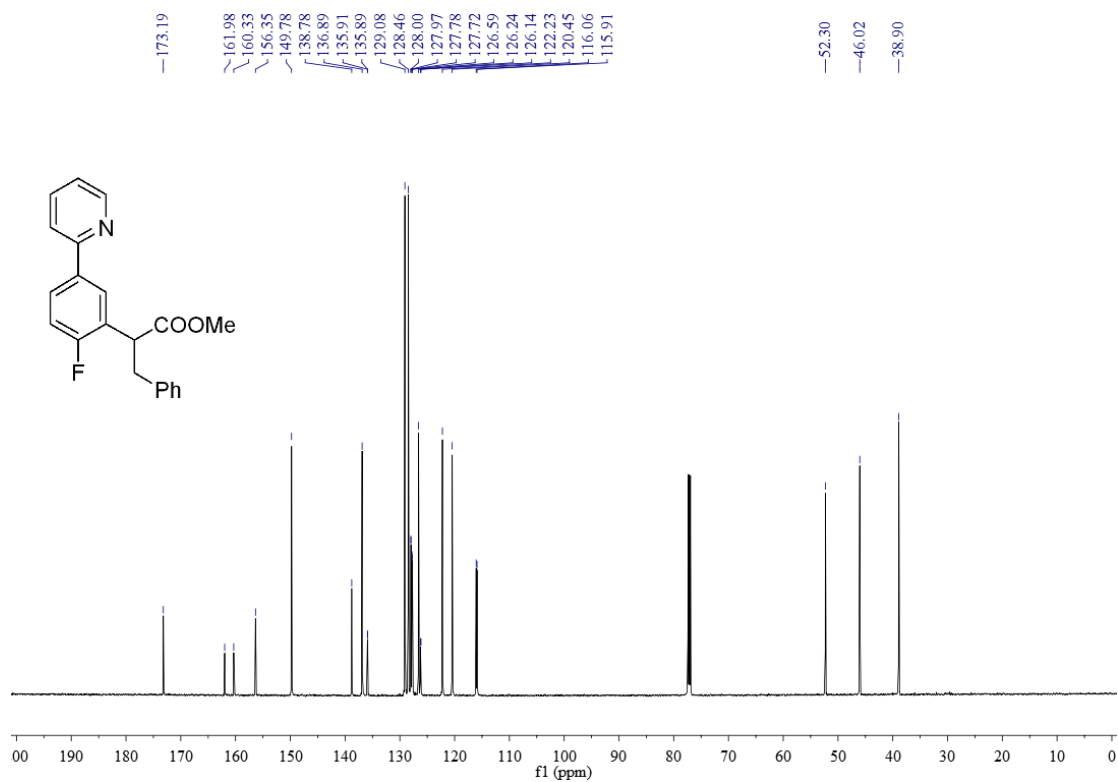

<sup>19</sup>F NMR of **3b**

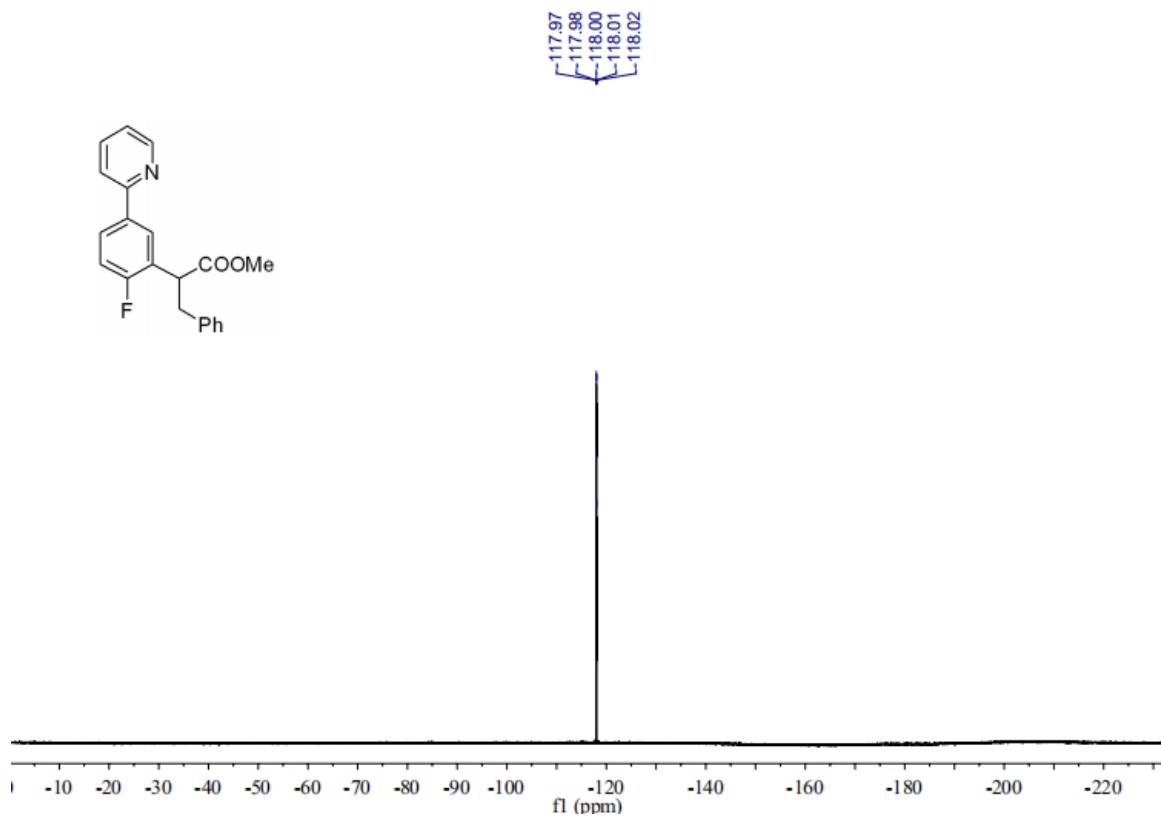

<sup>1</sup>H NMR of **3c**

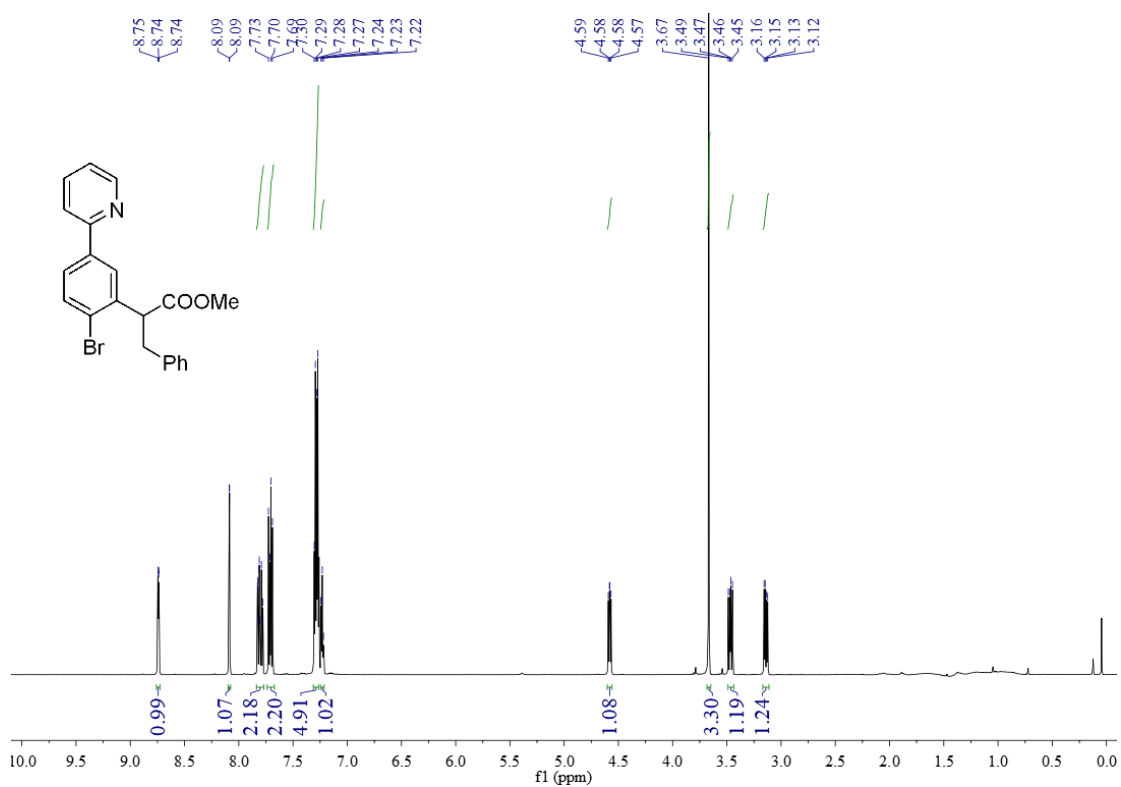

<sup>13</sup>C NMR of **3c**

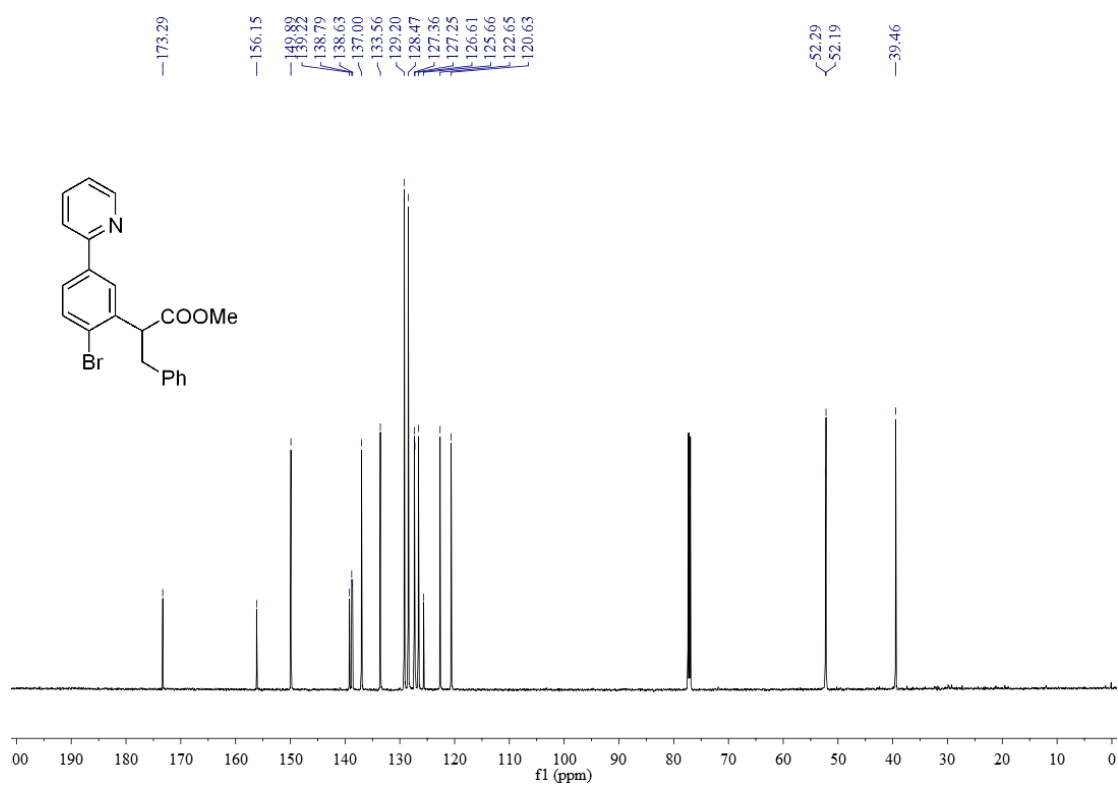

<sup>1</sup>H NMR of **3d**

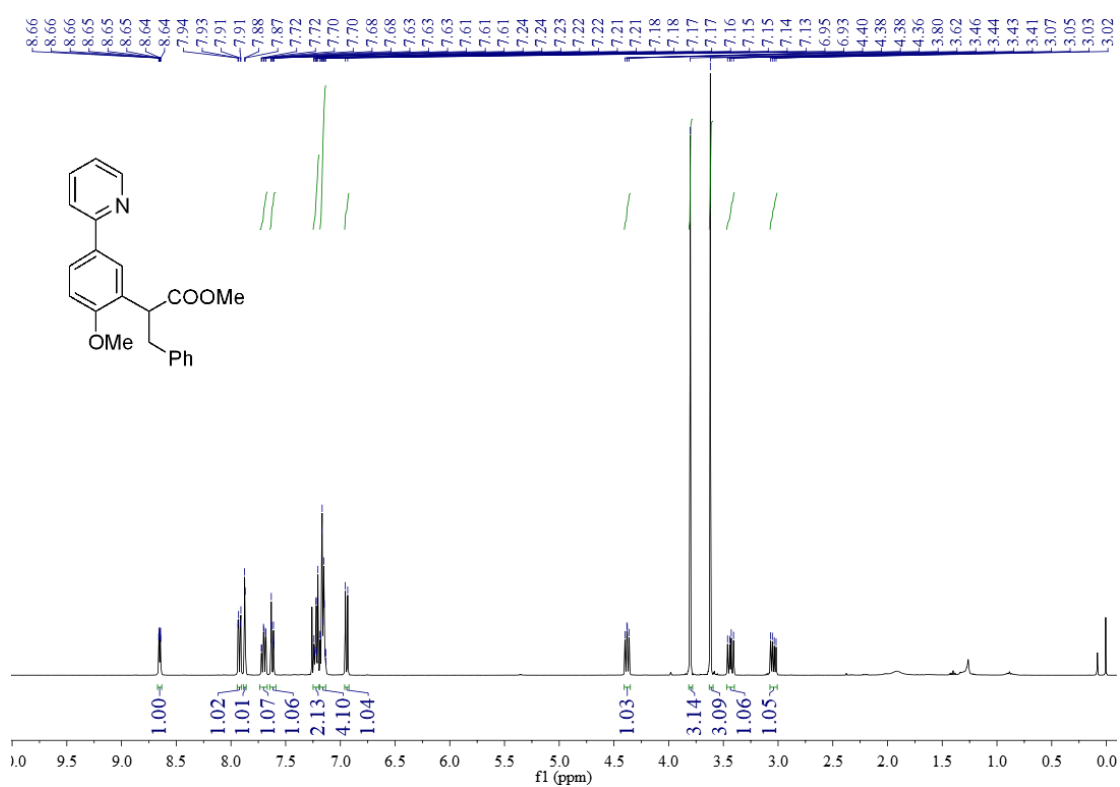

<sup>13</sup>C NMR of **3d**

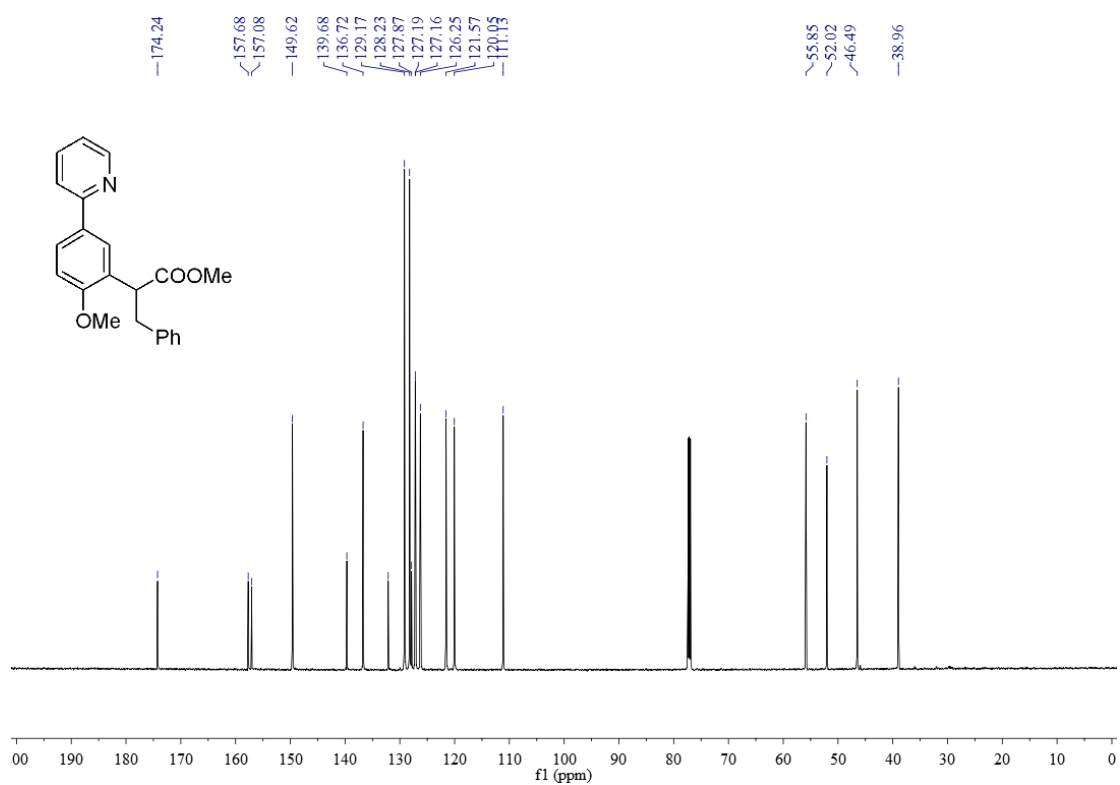

$^1\text{H}$  NMR of **3f**

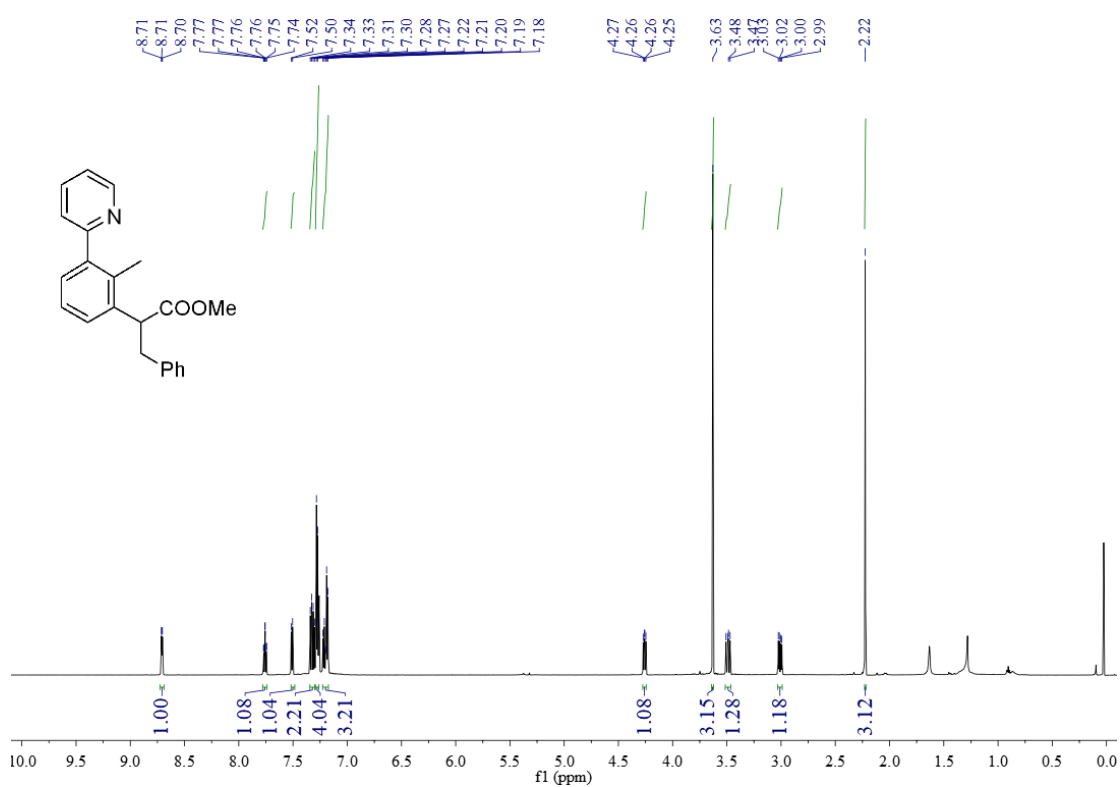

$^{13}\text{C}$  NMR of **3f**

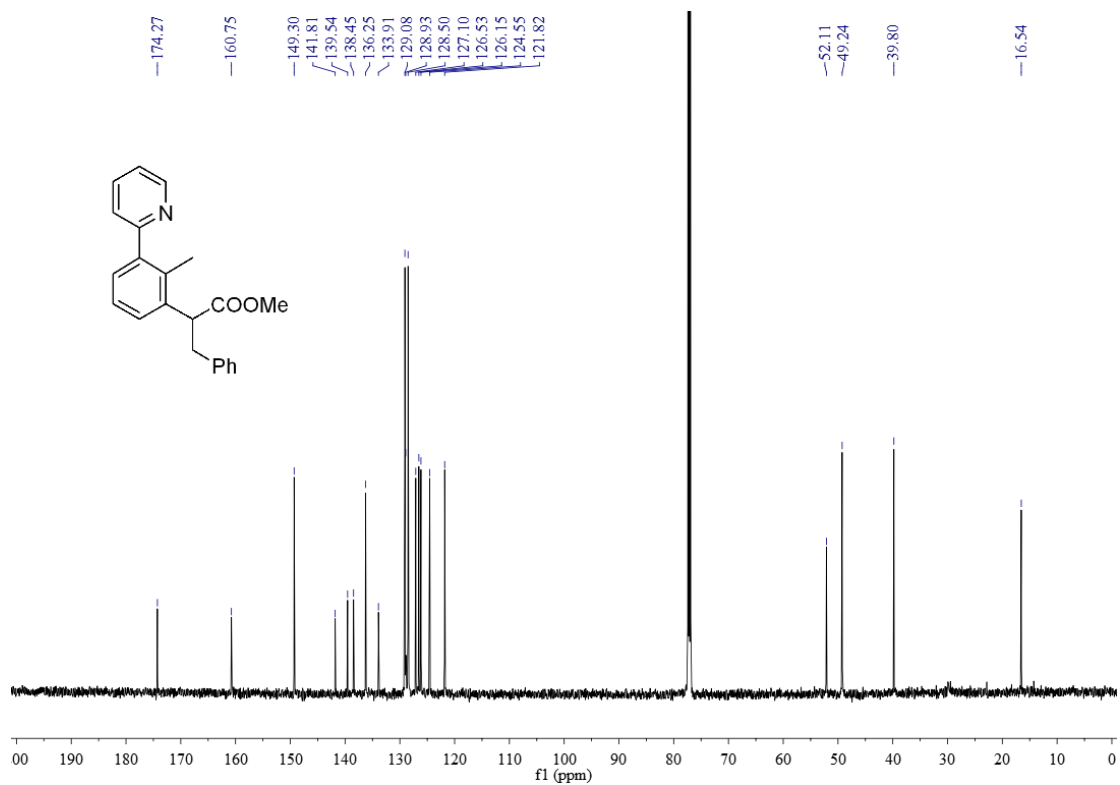

$^1\text{H}$  NMR of **3g**

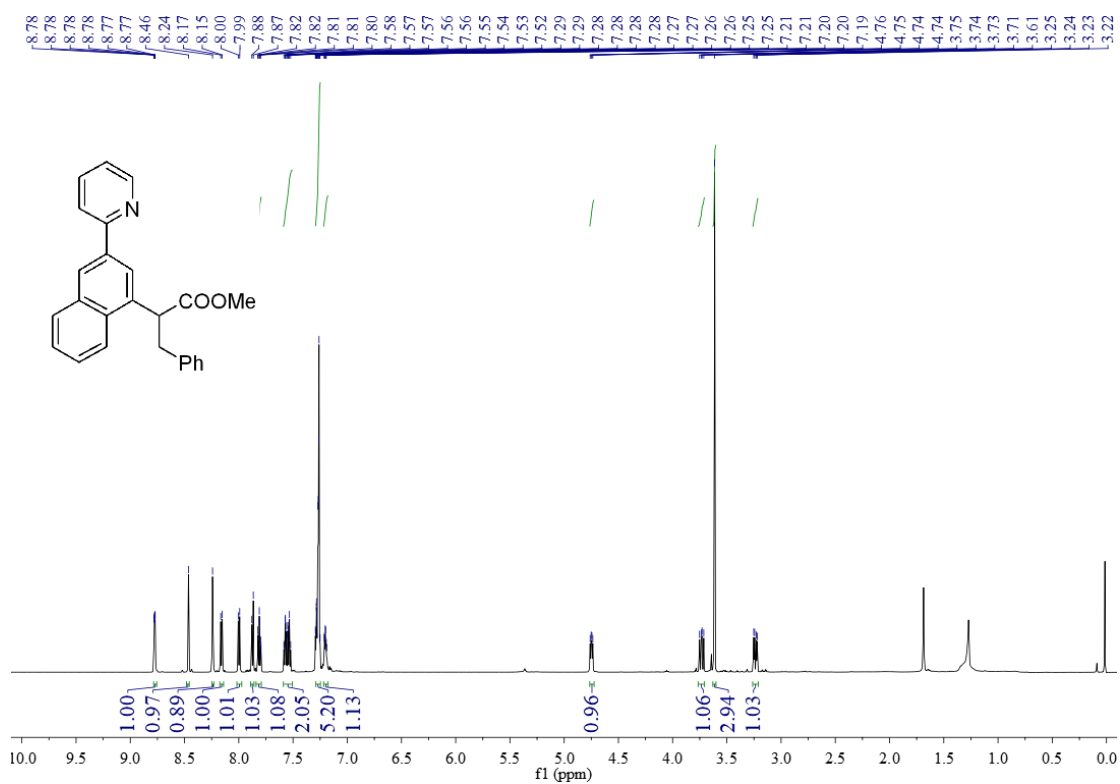

$^{13}\text{C}$  NMR of **3g**

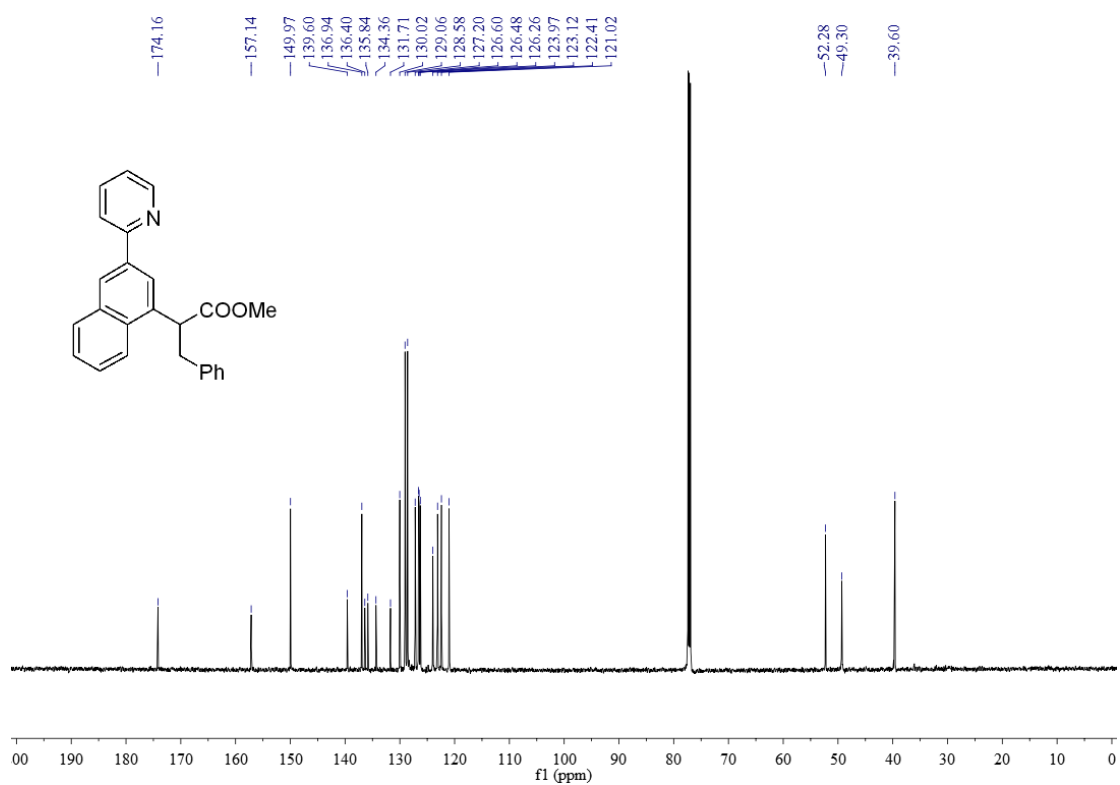

<sup>1</sup>H NMR of **3h**

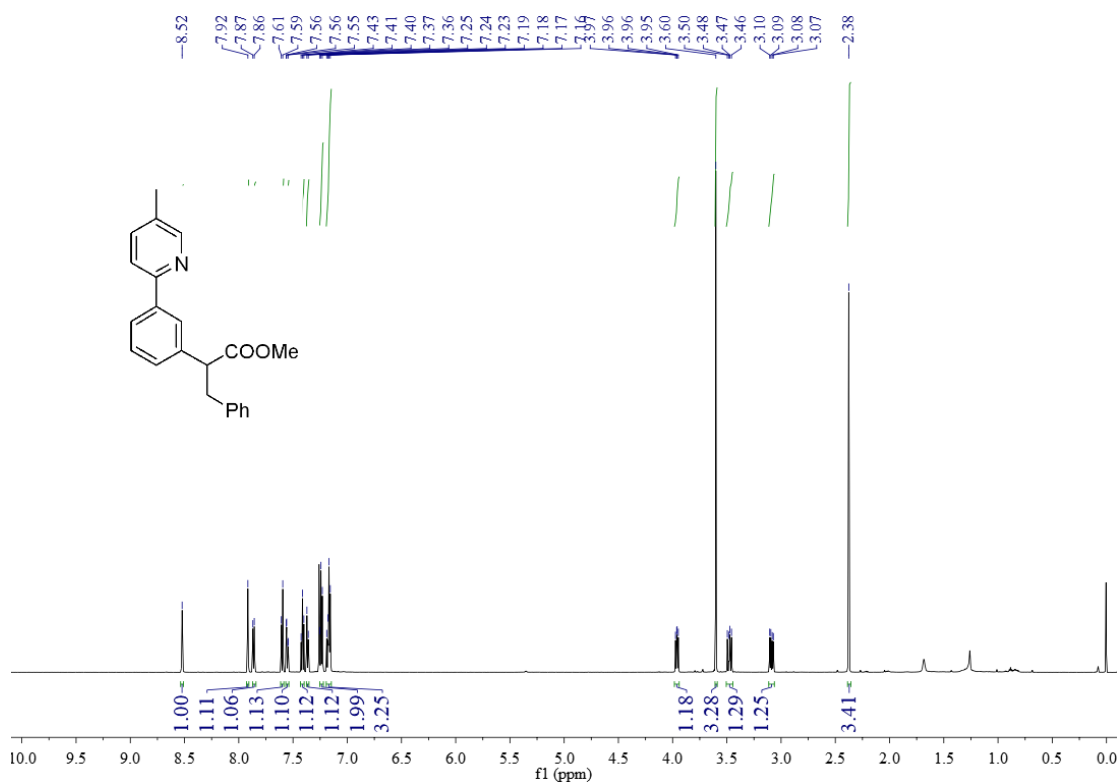

<sup>13</sup>C NMR of **3h**

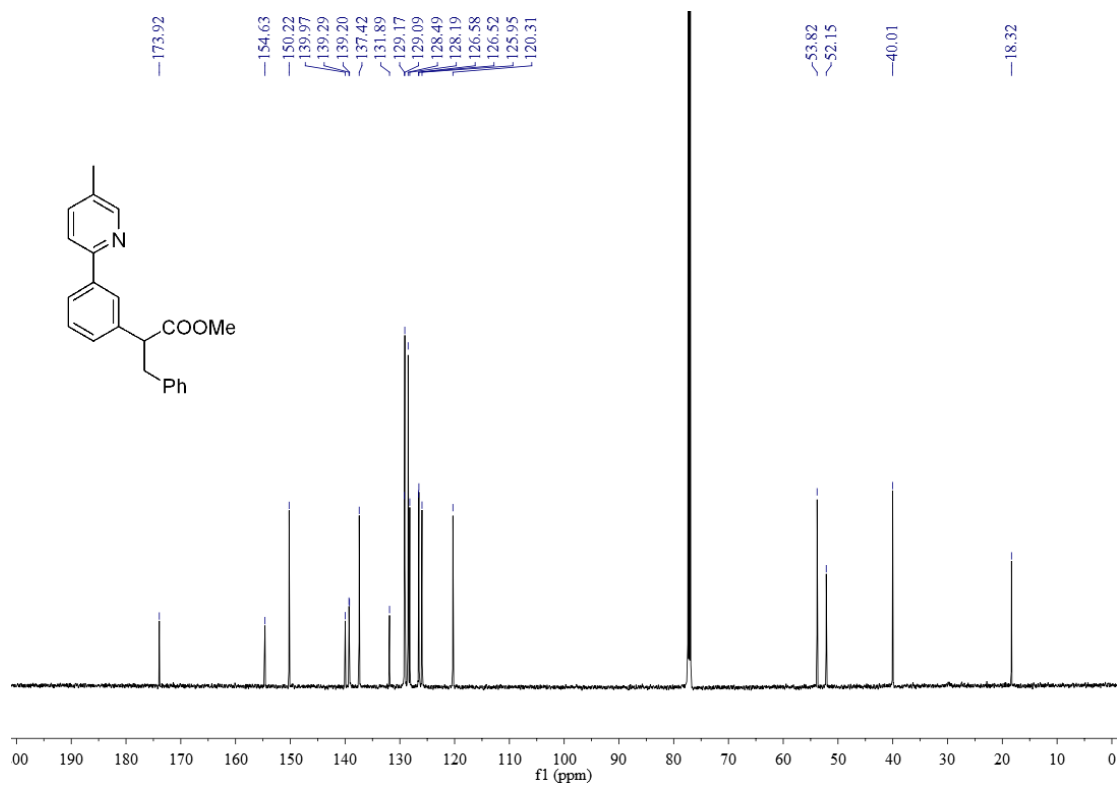

<sup>1</sup>H NMR of **3i**

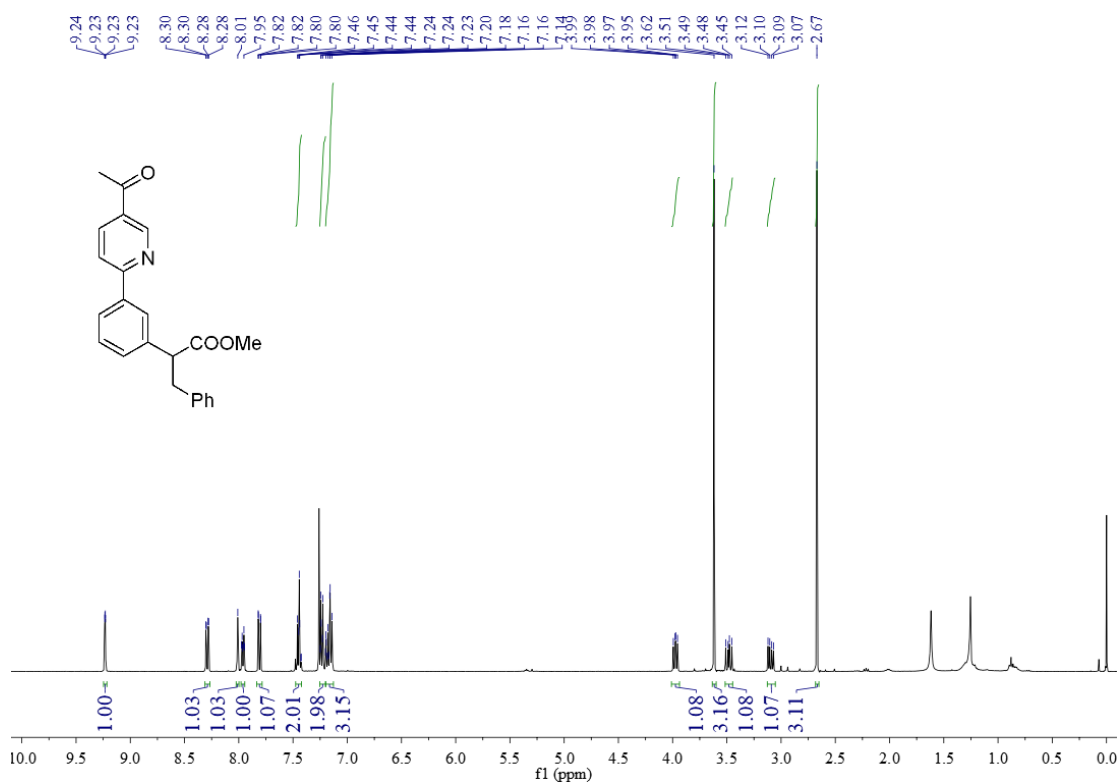

<sup>13</sup>C NMR of **3i**

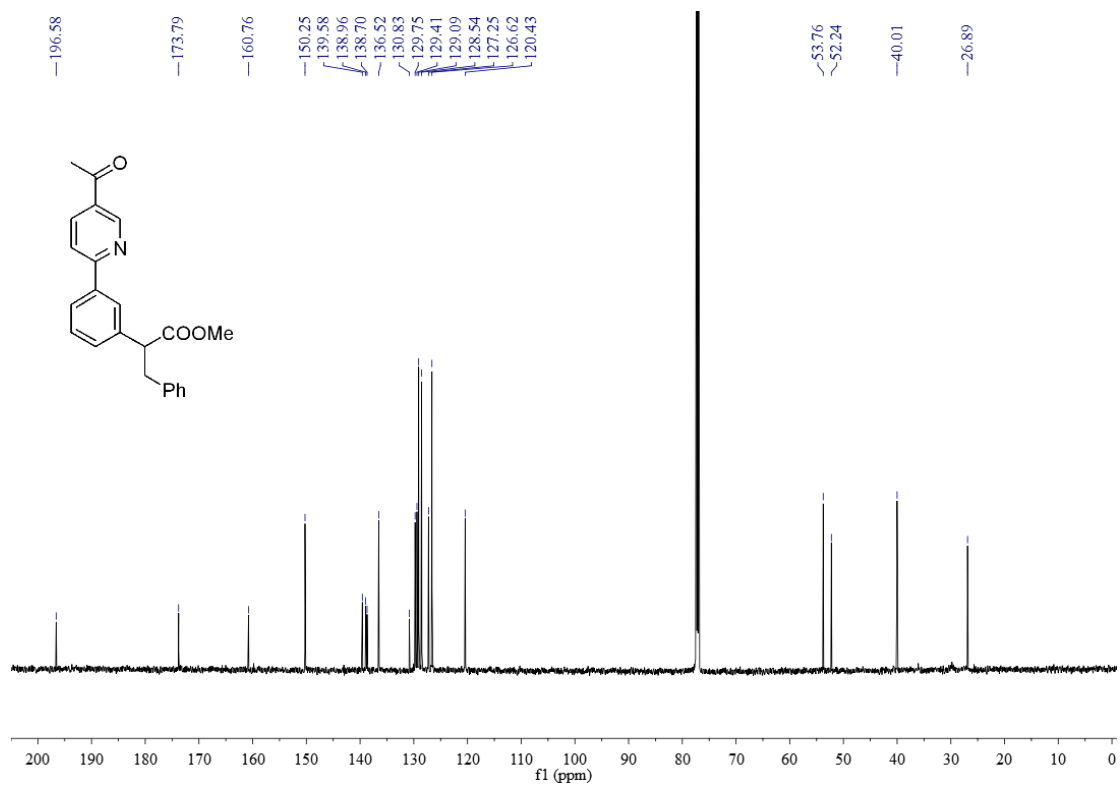

$^1\text{H}$  NMR of **3j**

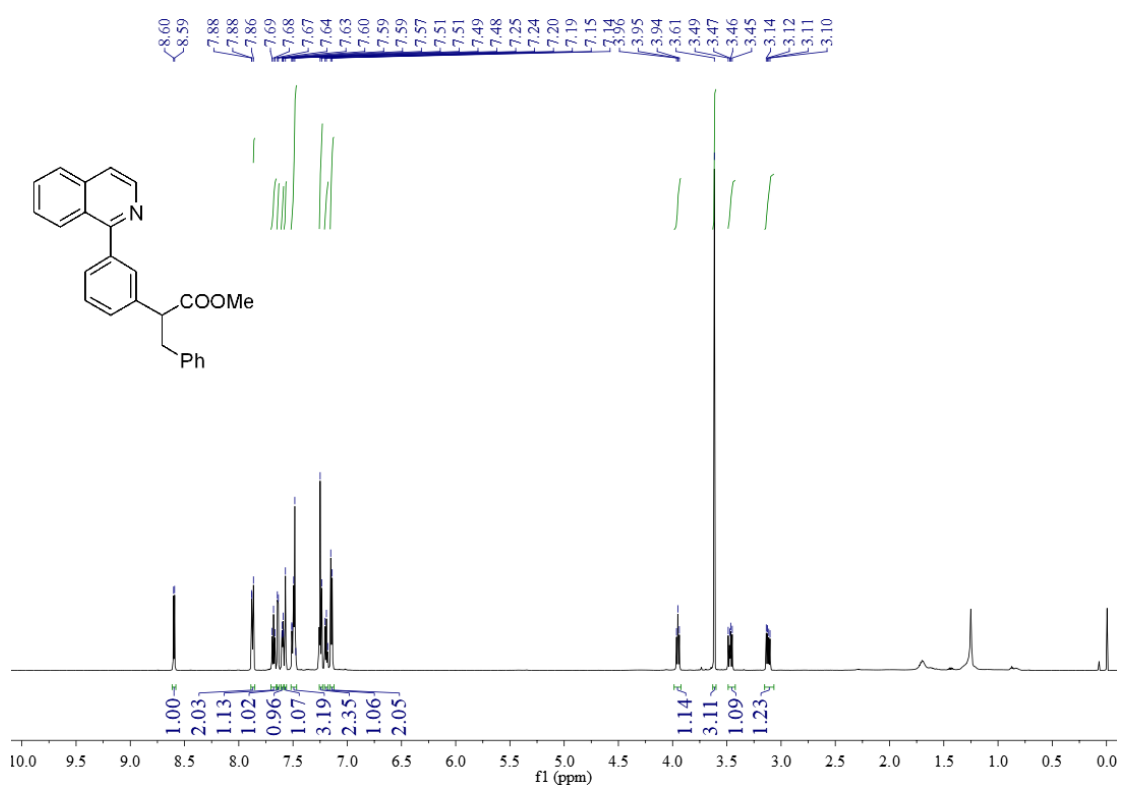

$^{13}\text{C}$  NMR of **3j**

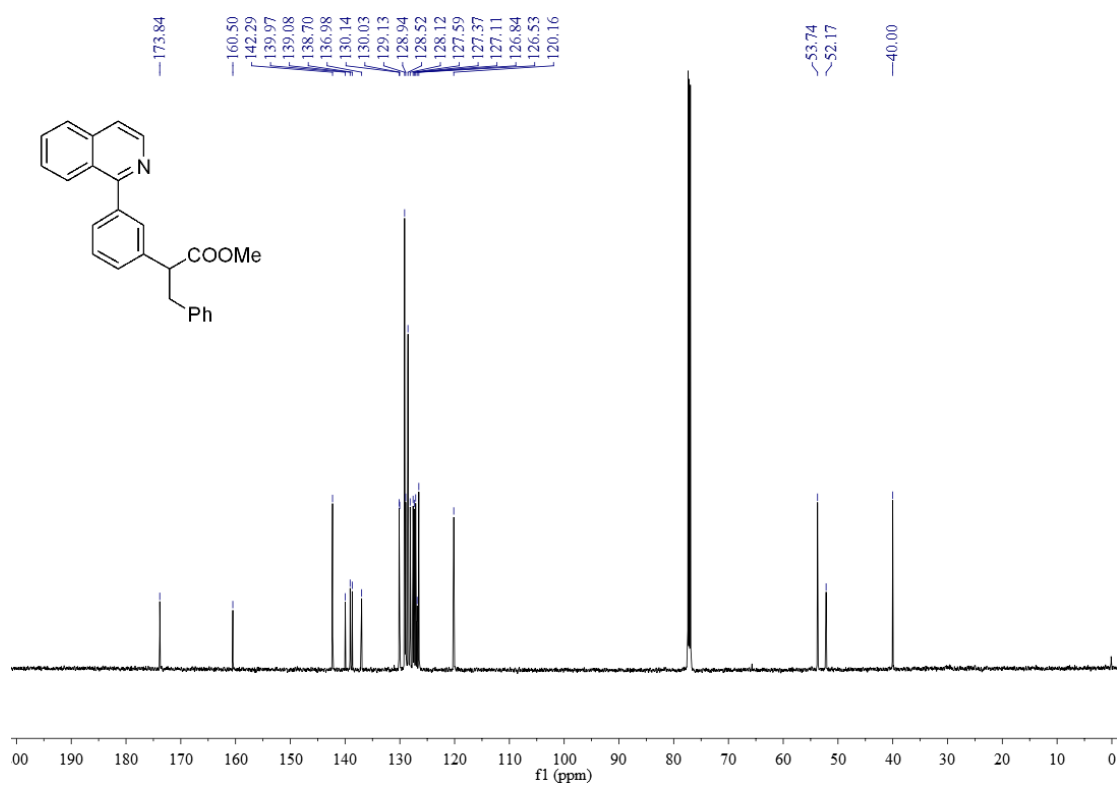

$^1\text{H}$  NMR of **3k**

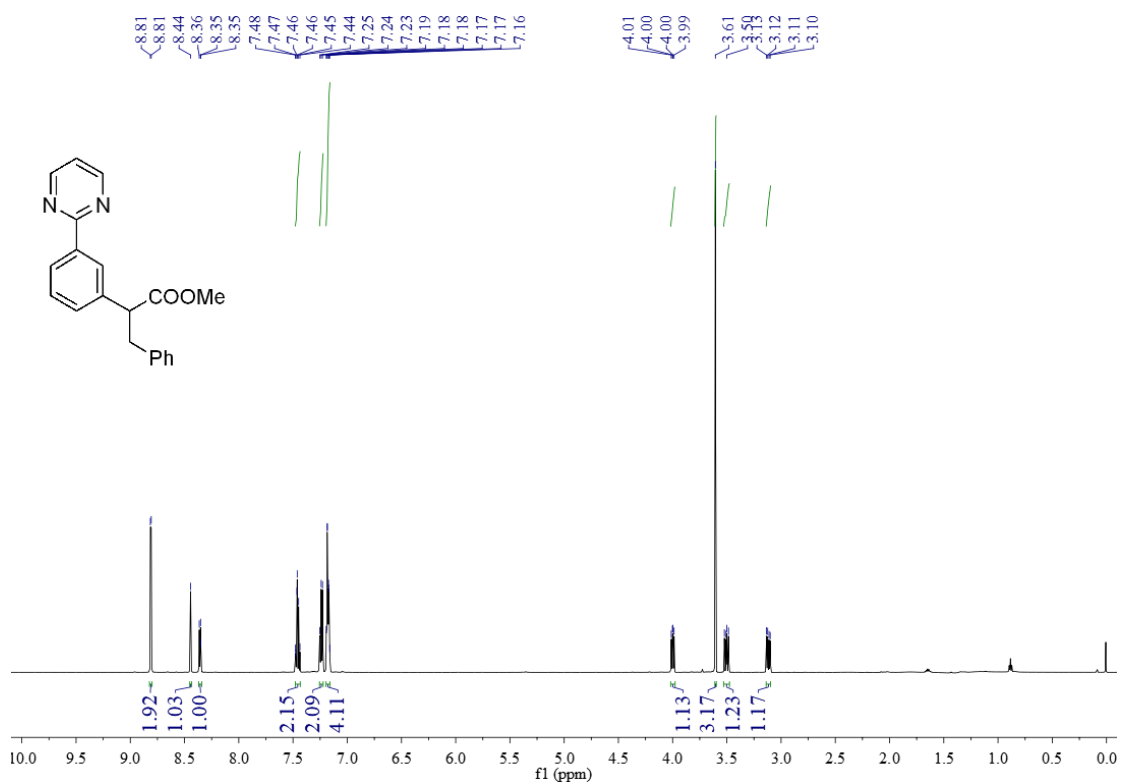

$^{13}\text{C}$  NMR of **3k**

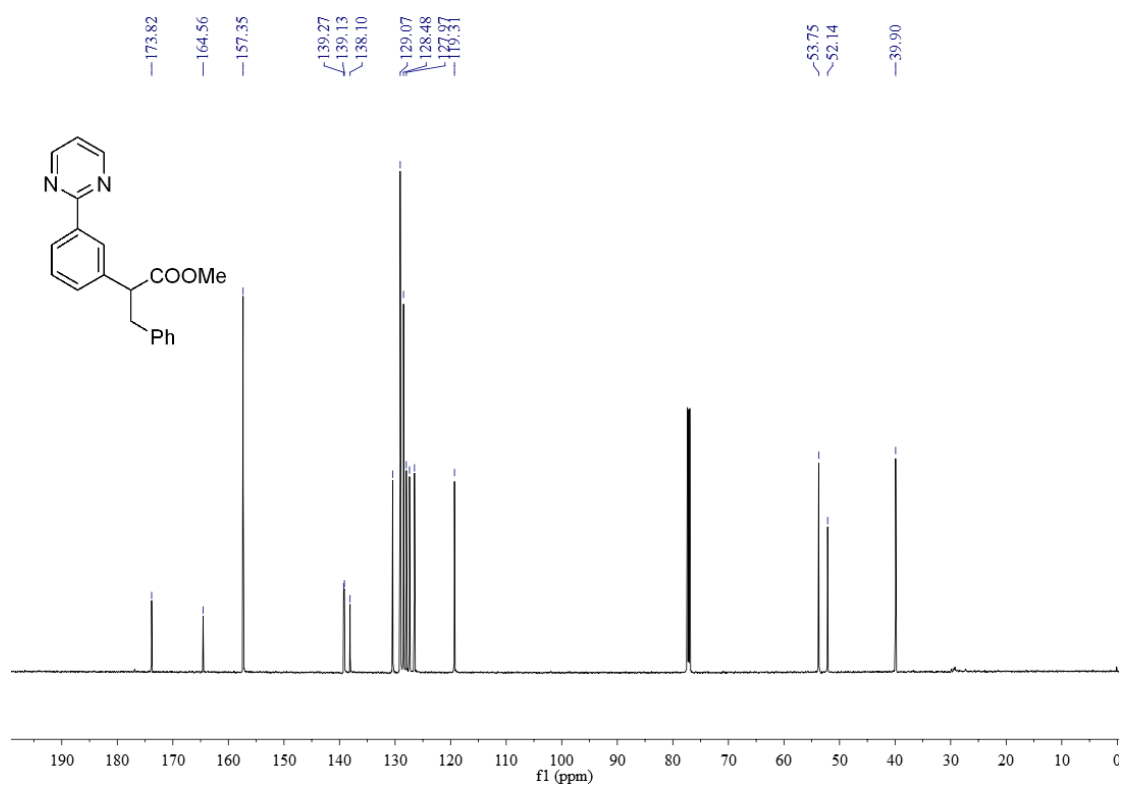

<sup>1</sup>H NMR of **31**

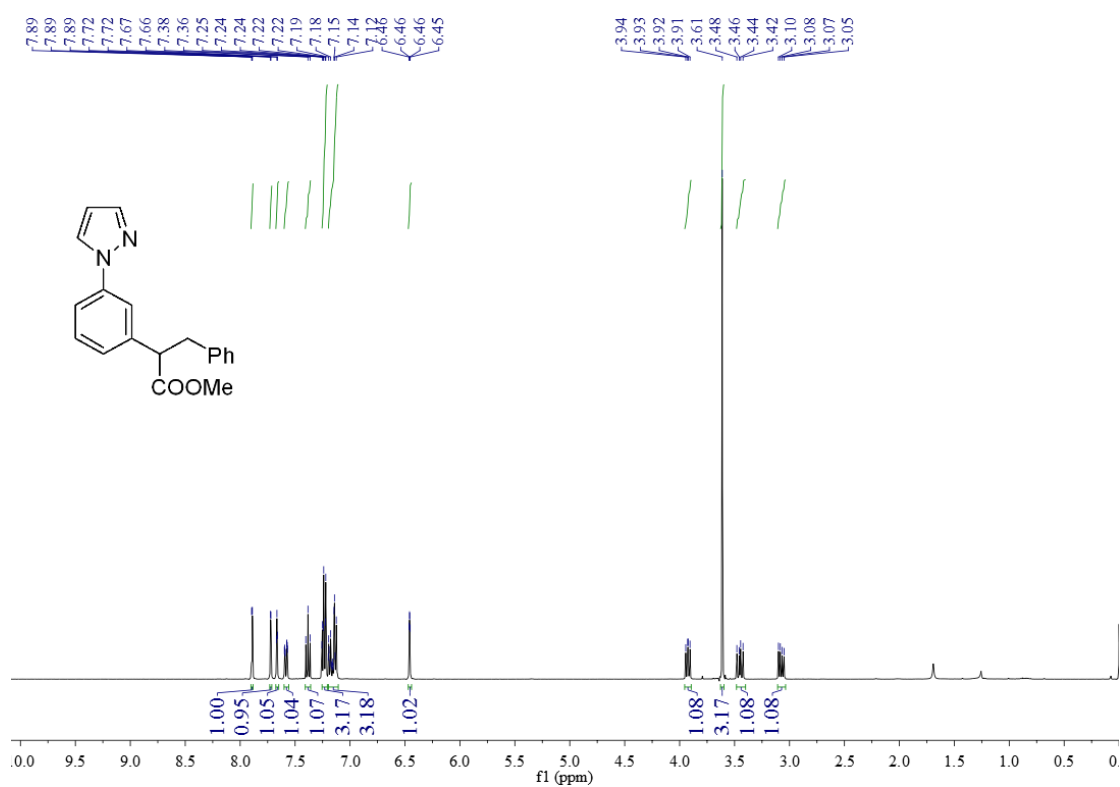

<sup>13</sup>C NMR of **31**

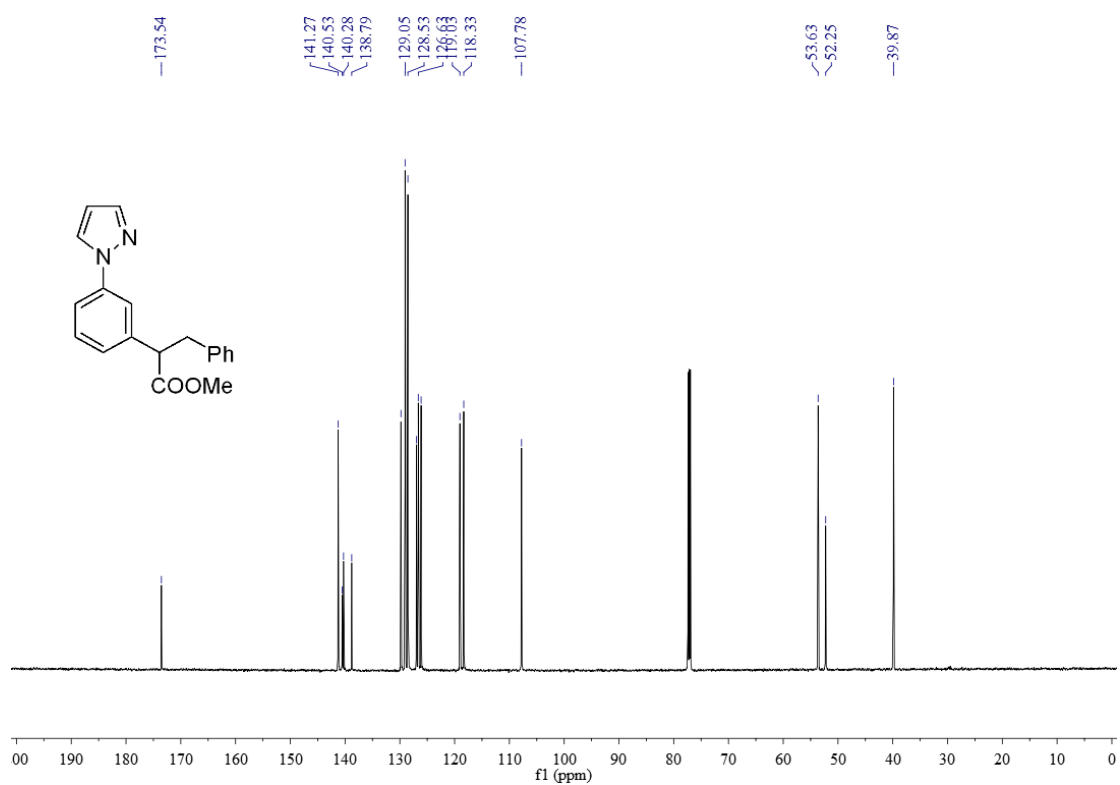

# <sup>1</sup>H NMR of **3m**

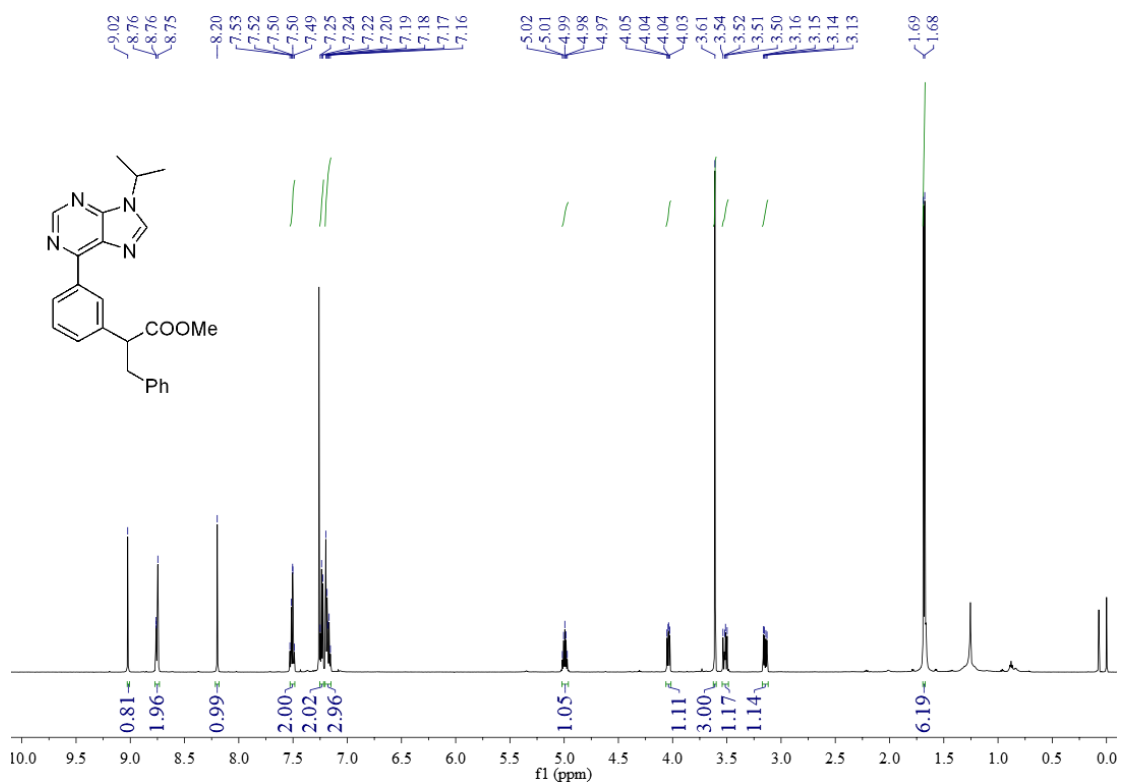

# <sup>13</sup>C NMR of **3m**

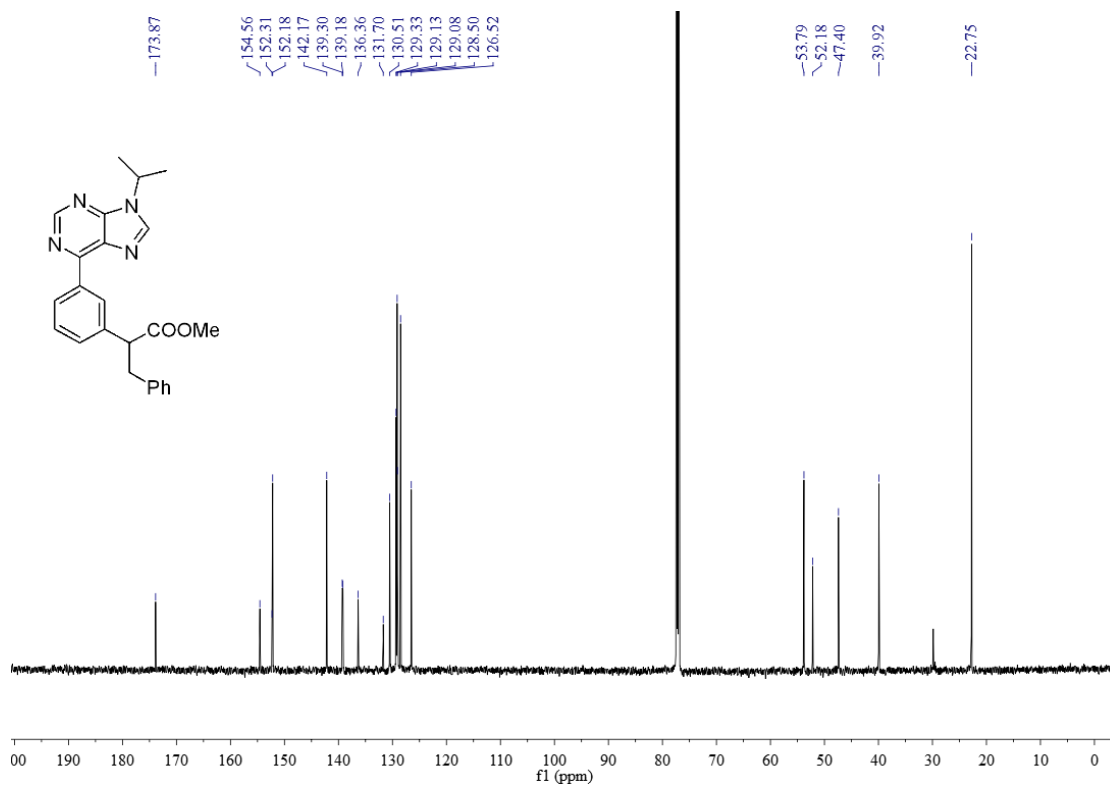

<sup>1</sup>H NMR of **4a**

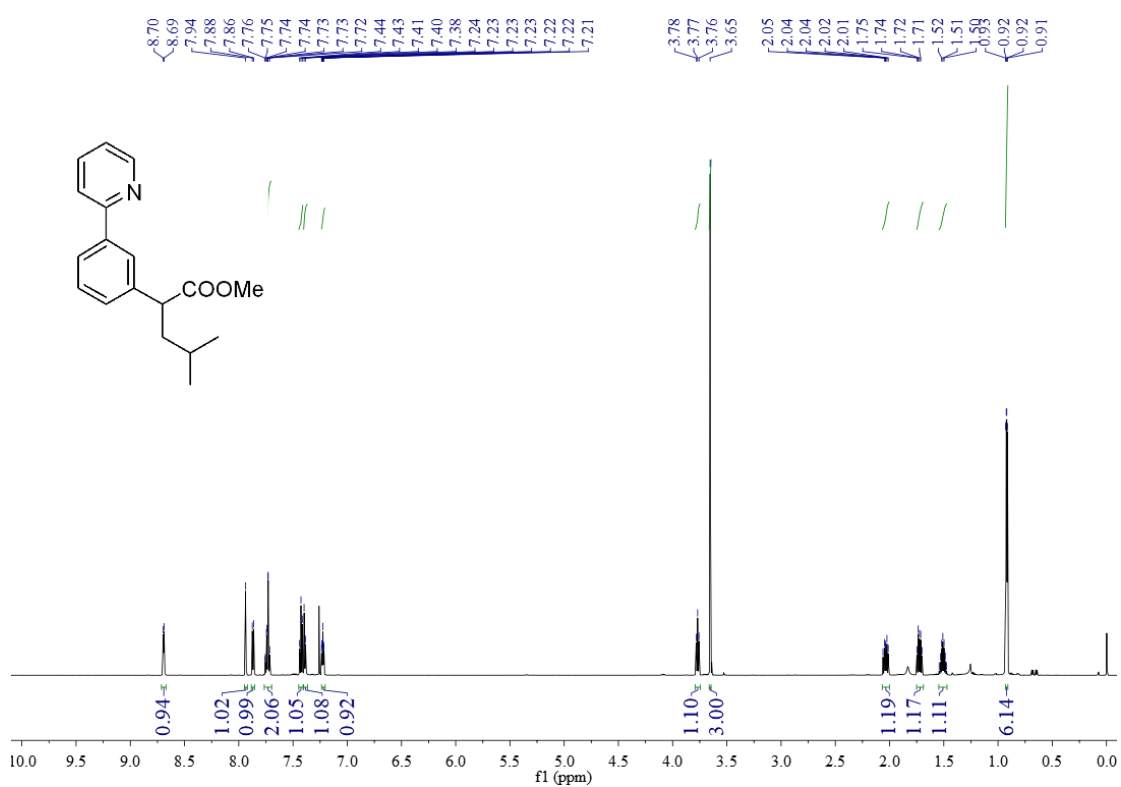

<sup>13</sup>C NMR of **4a**

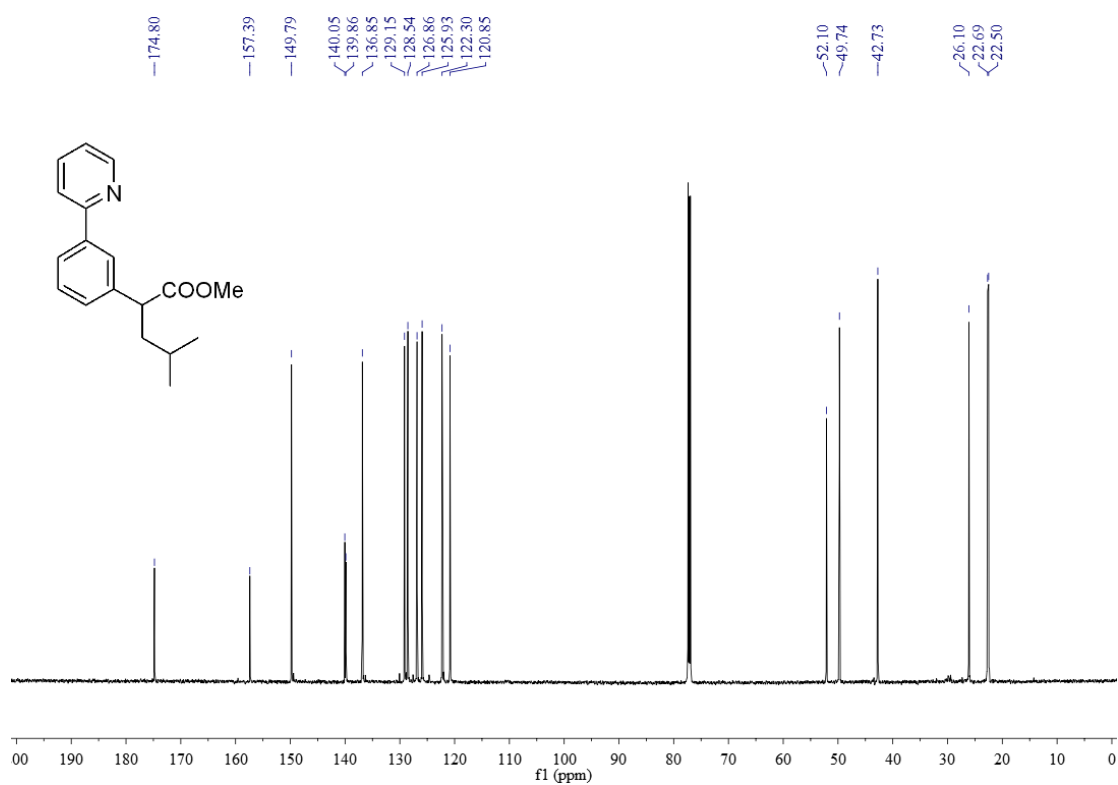

$^1\text{H}$  NMR of **4b**

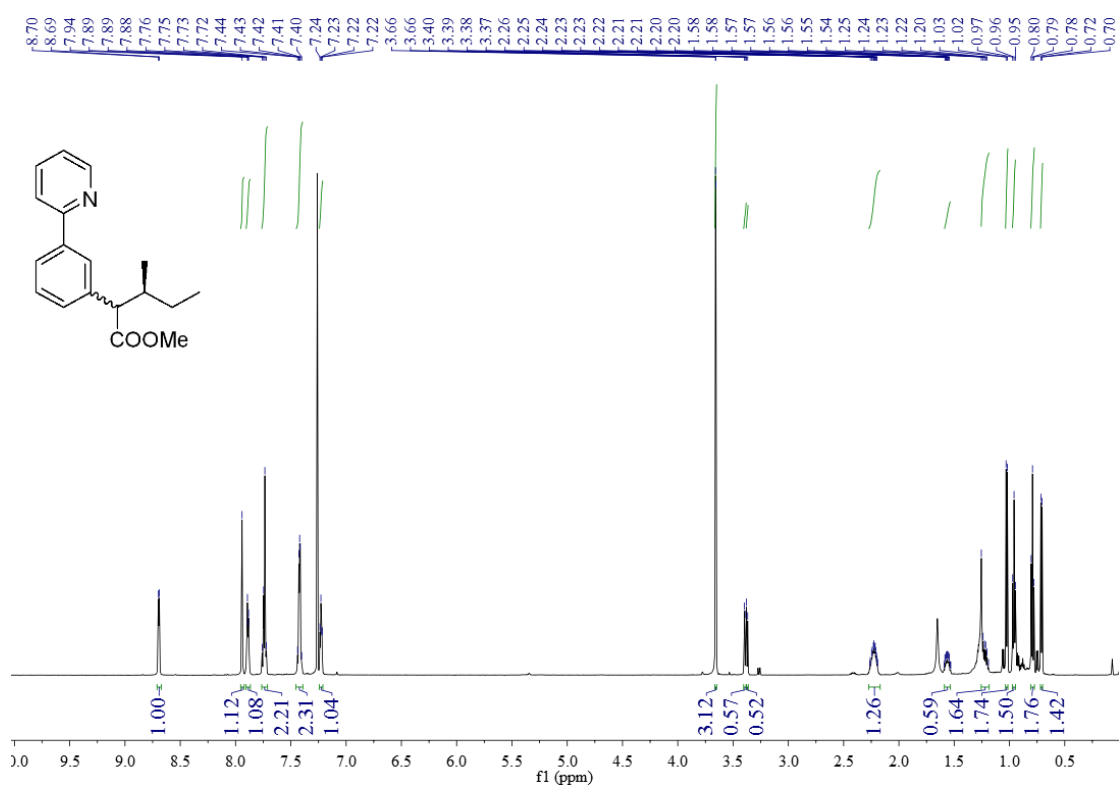

$^{13}\text{C}$  NMR of **4b**

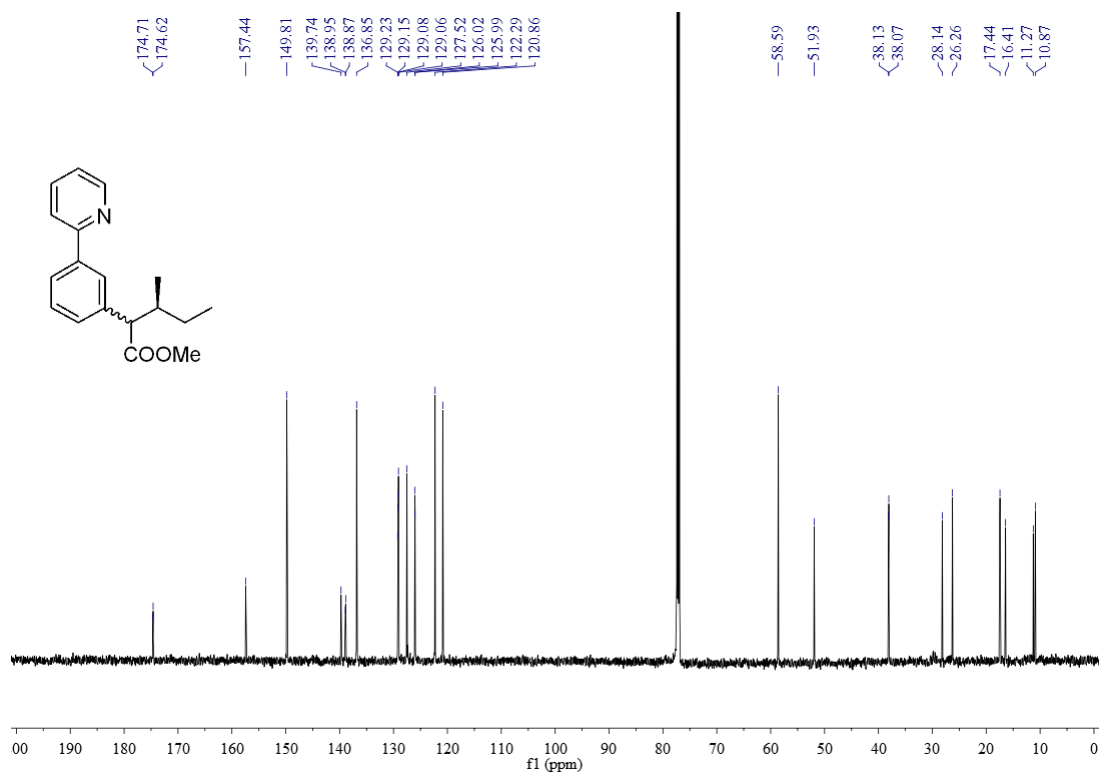

<sup>1</sup>H NMR of **4c**

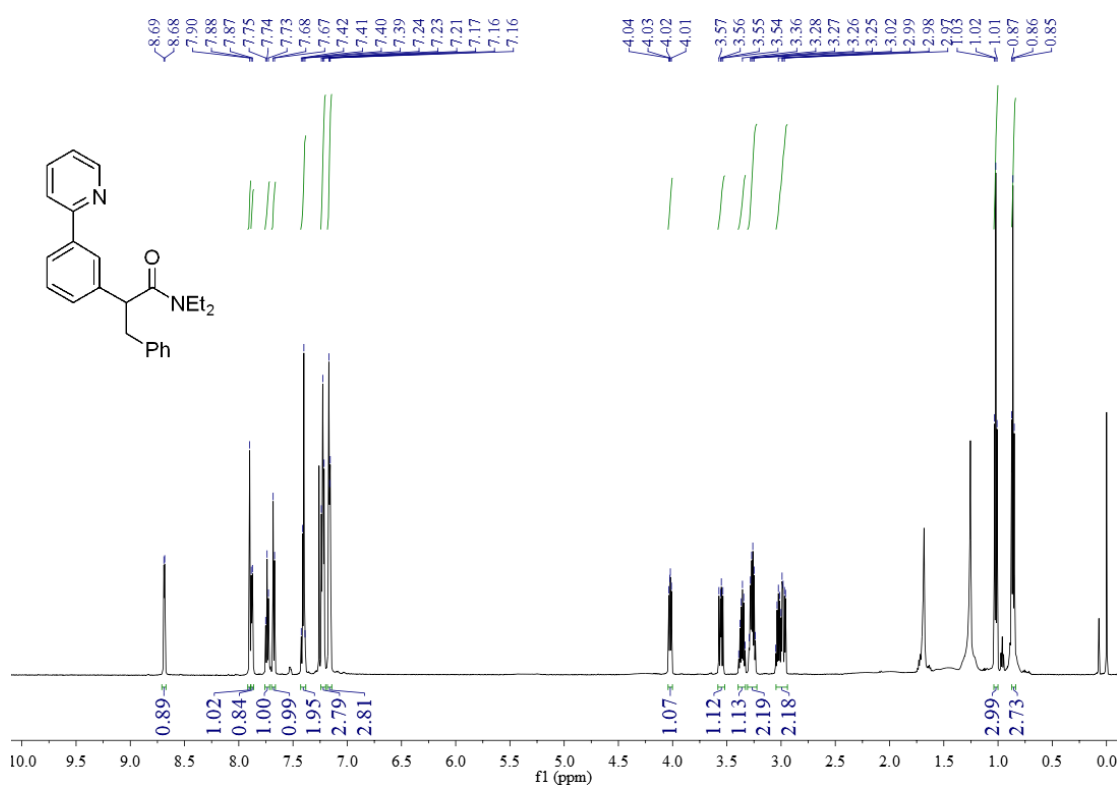

<sup>13</sup>C NMR of **4c**

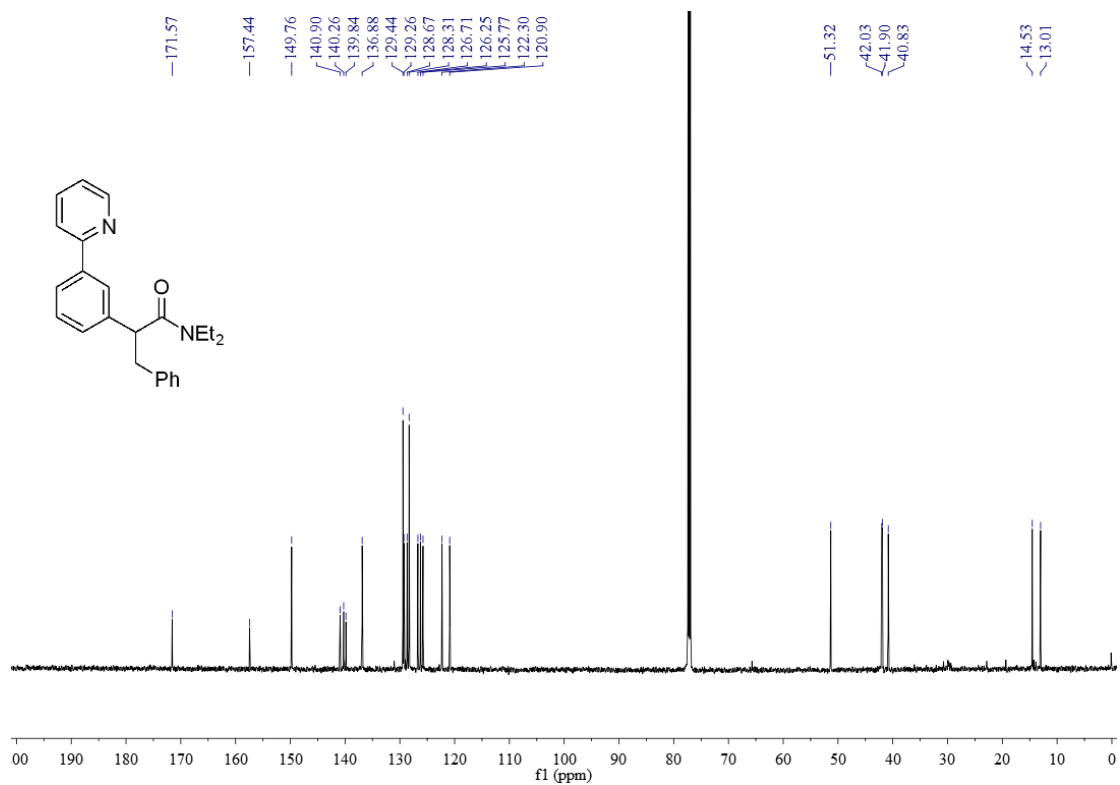

<sup>1</sup>H NMR of **4d**

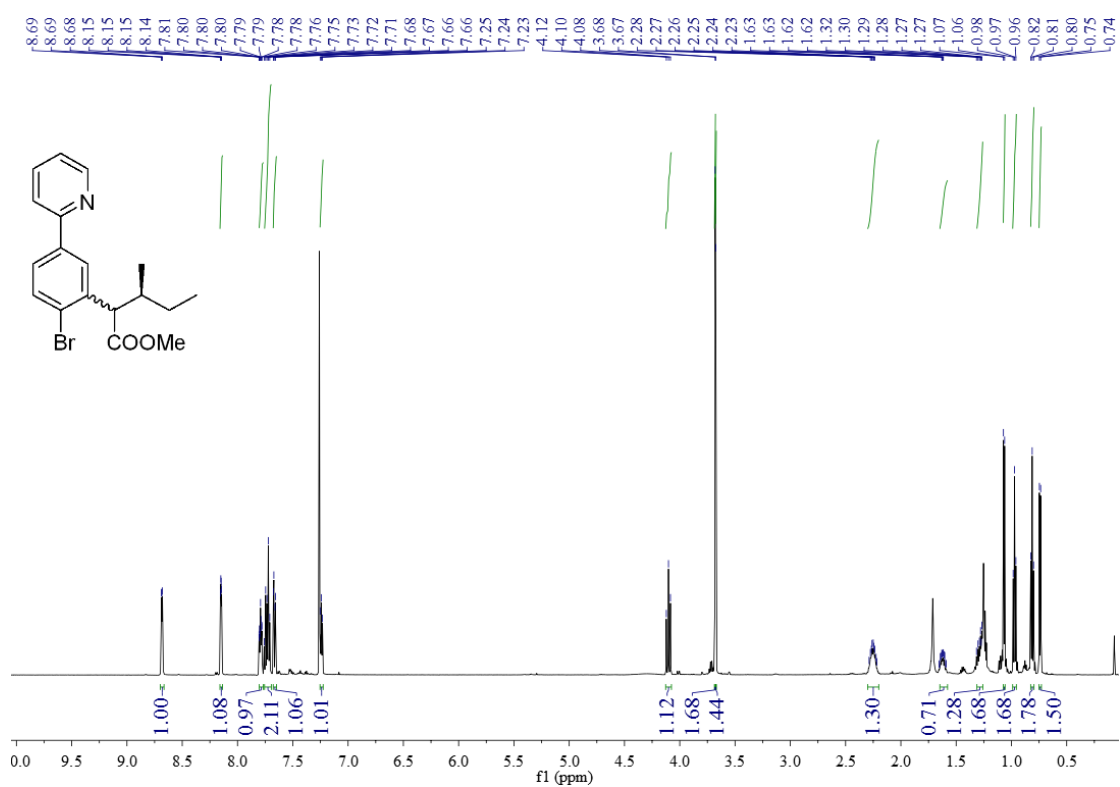

<sup>13</sup>C NMR of **4d**

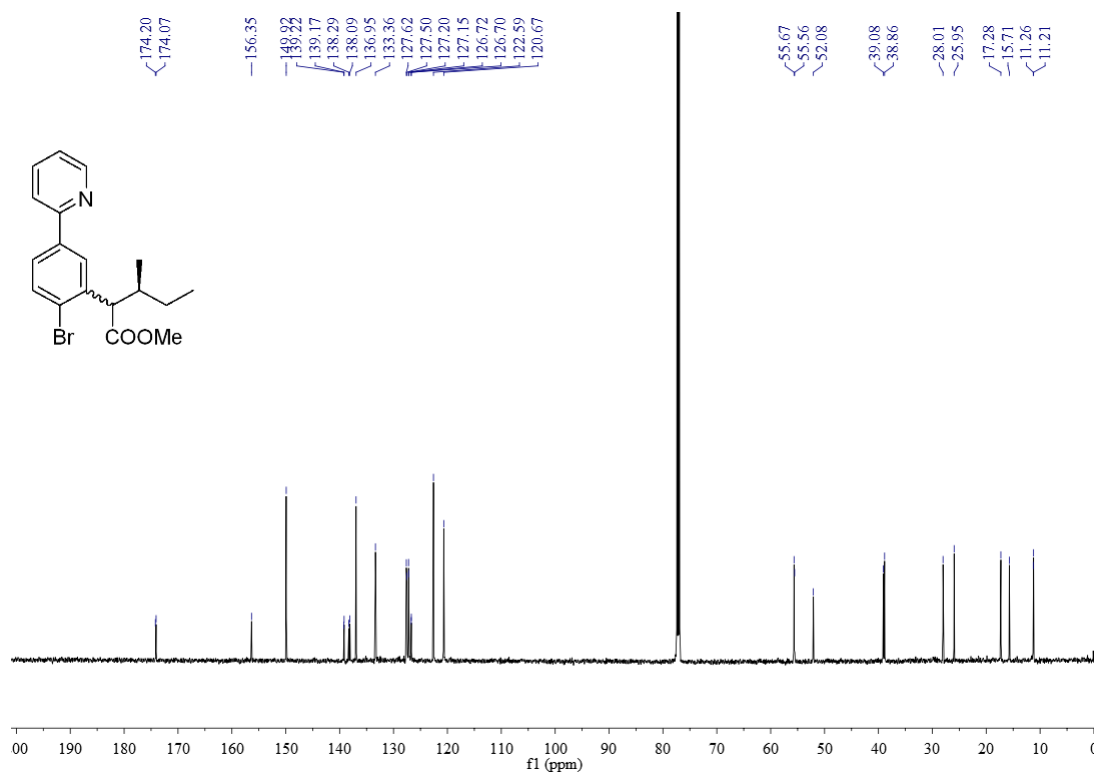

<sup>1</sup>H NMR of **4e**

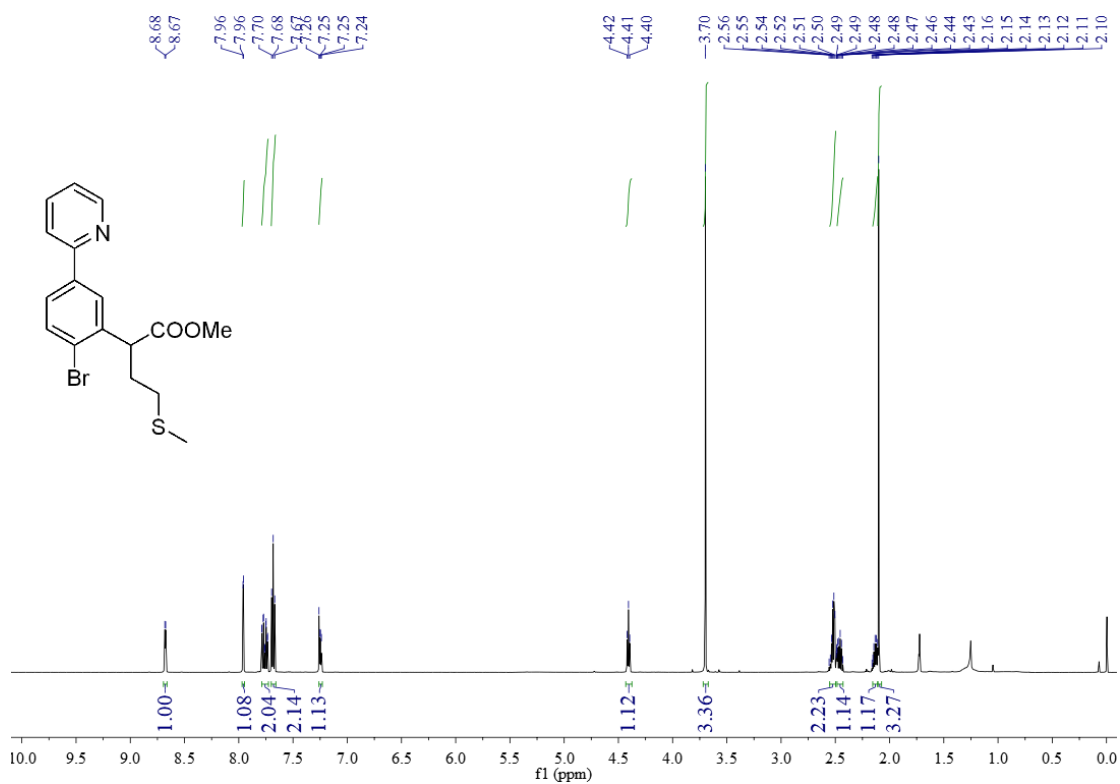

<sup>13</sup>C NMR of **4e**

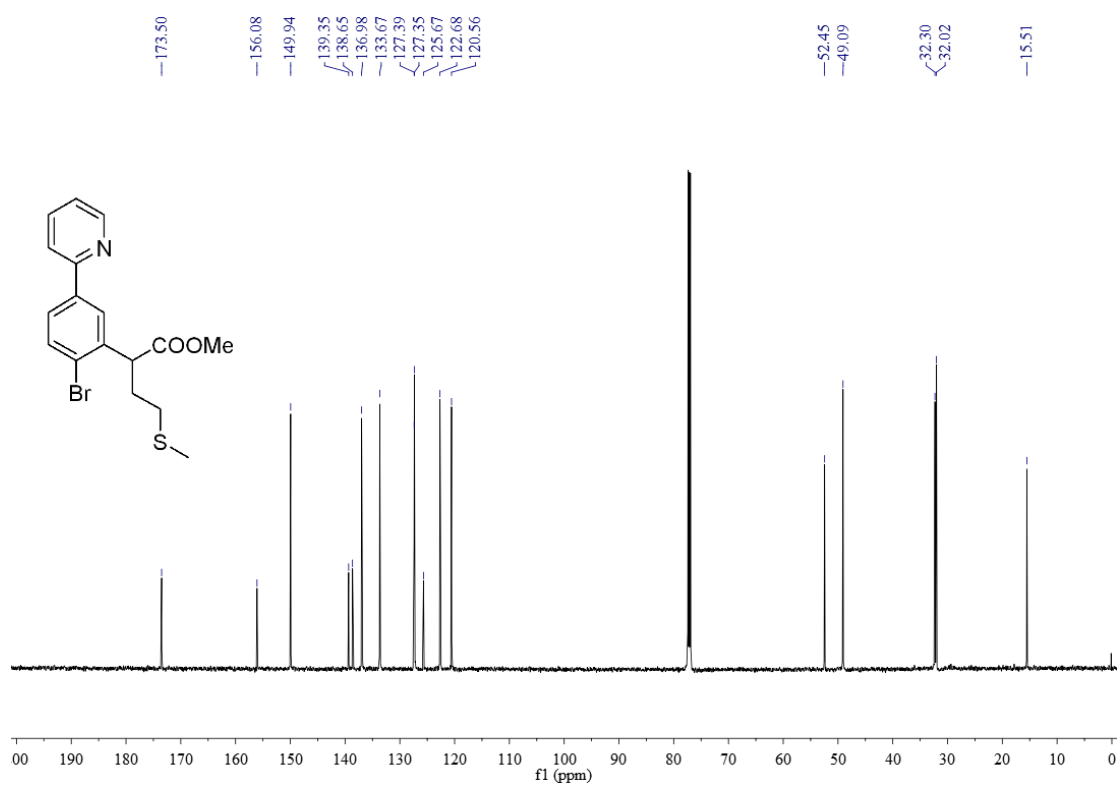

<sup>1</sup>H NMR of **4f**

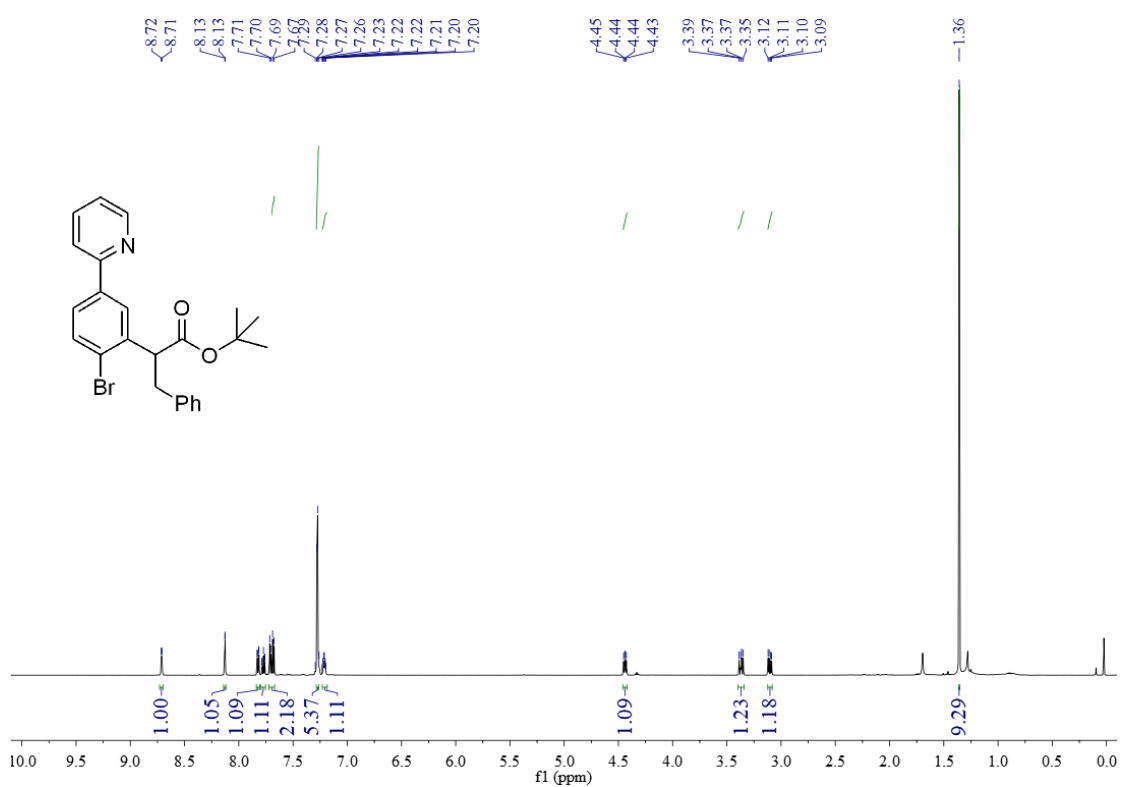

<sup>13</sup>C NMR of **4f**

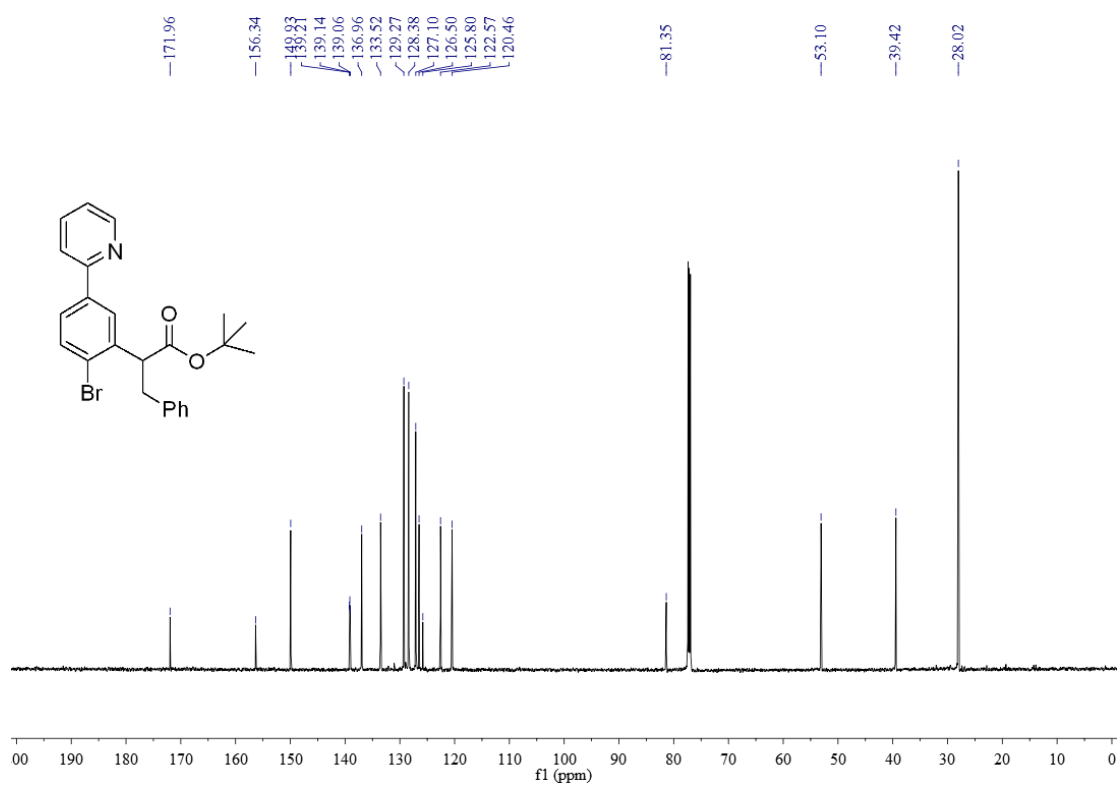

$^1\text{H}$  NMR of **4g**

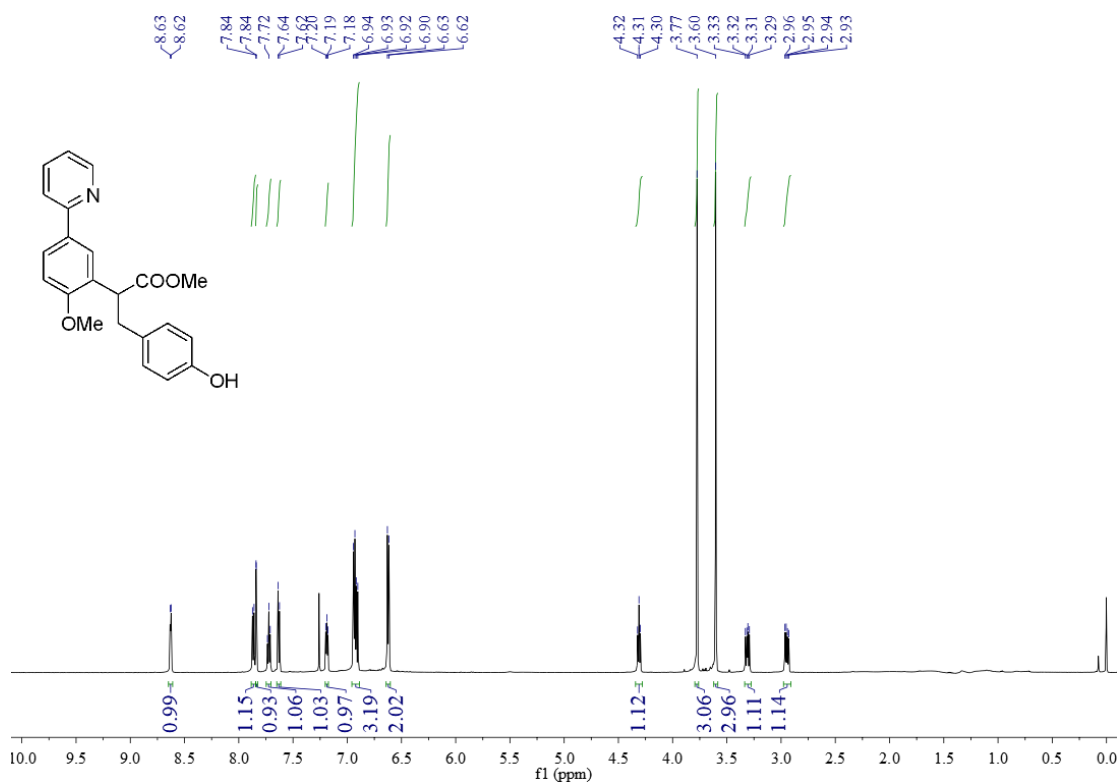

$^{13}\text{C}$  NMR of **4g**

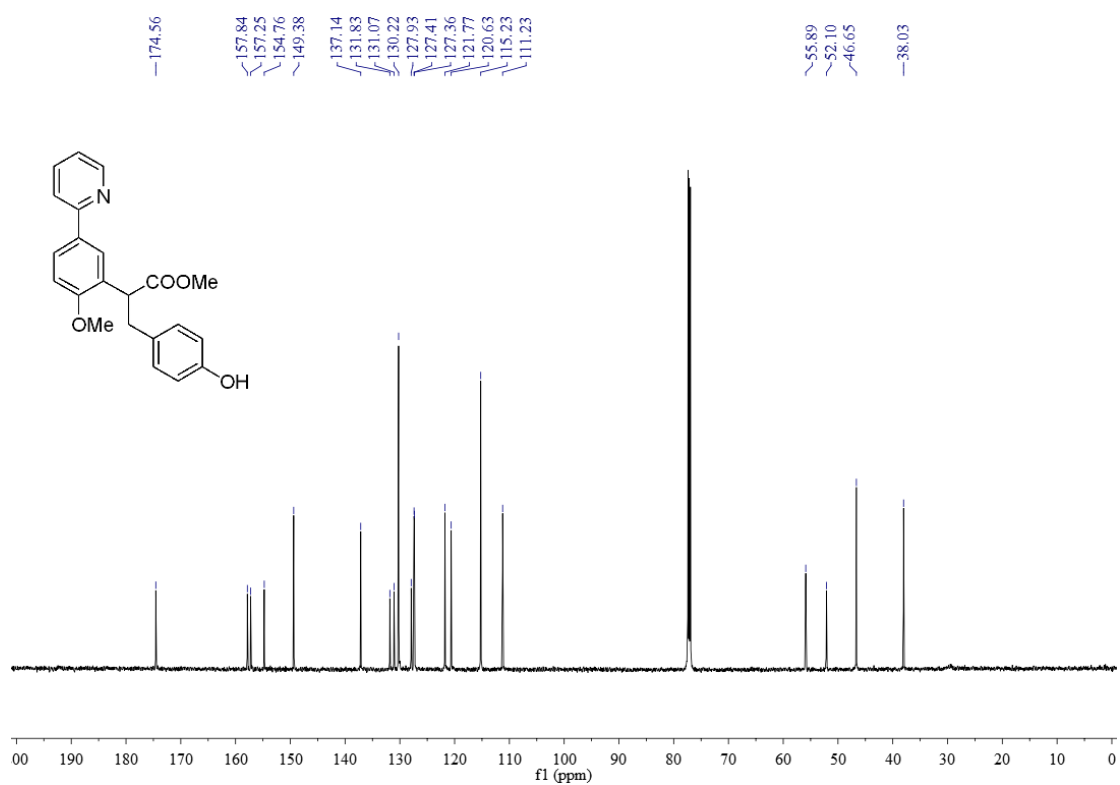

<sup>1</sup>H NMR of **4h**

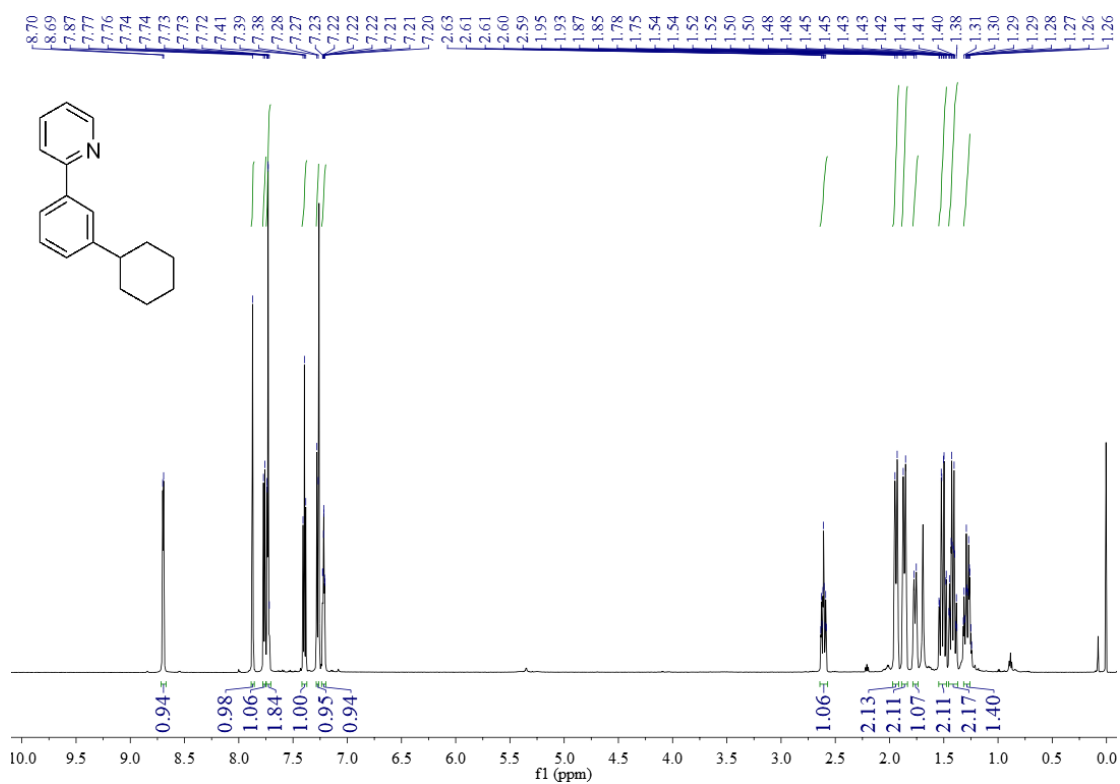

<sup>13</sup>C NMR of **4h**

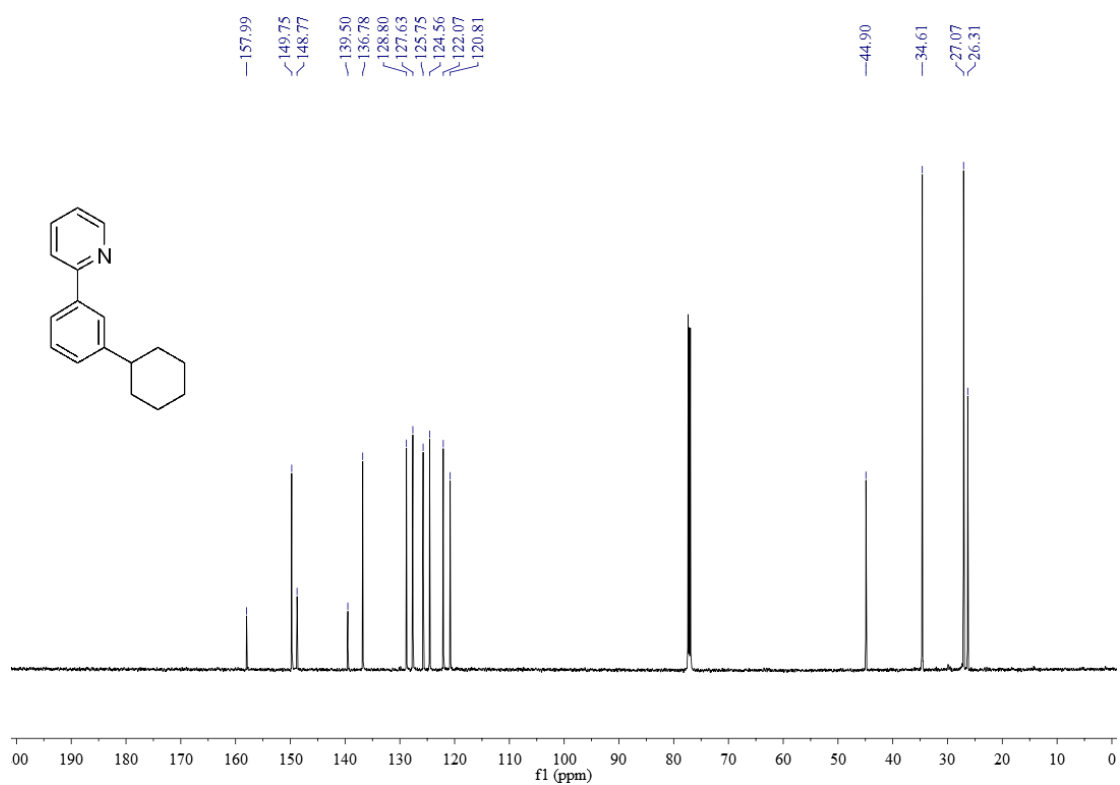

<sup>1</sup>H NMR of **4i**

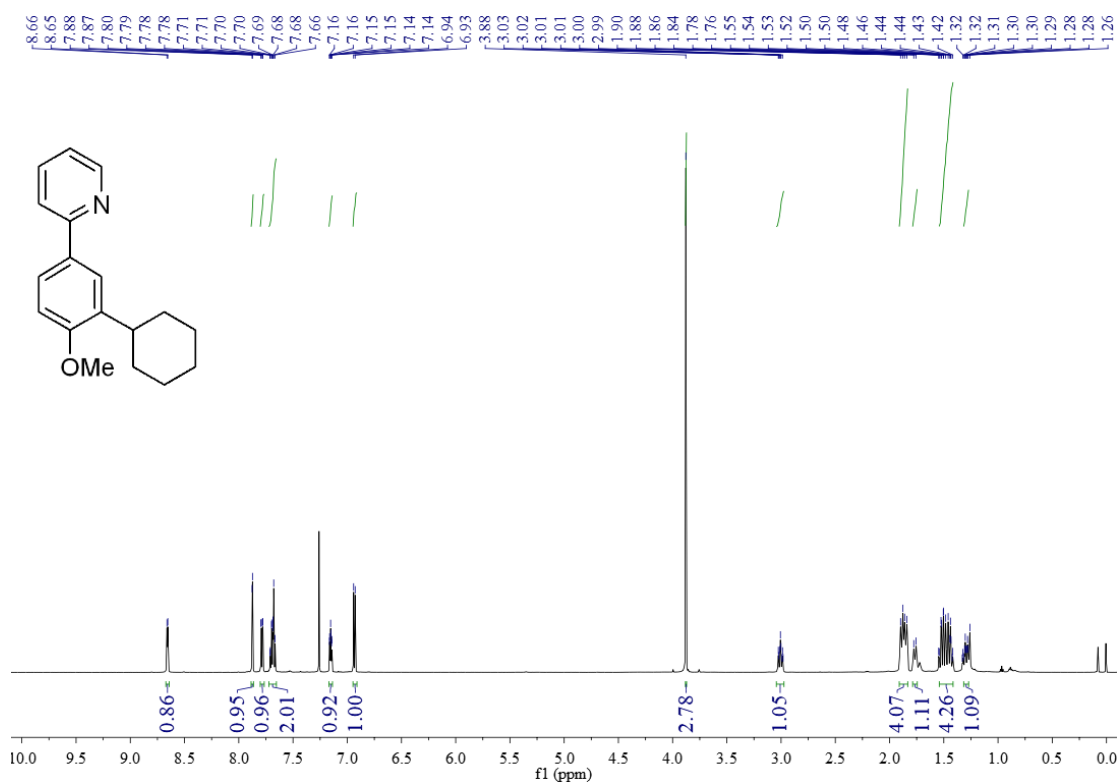

<sup>13</sup>C NMR of **4i**

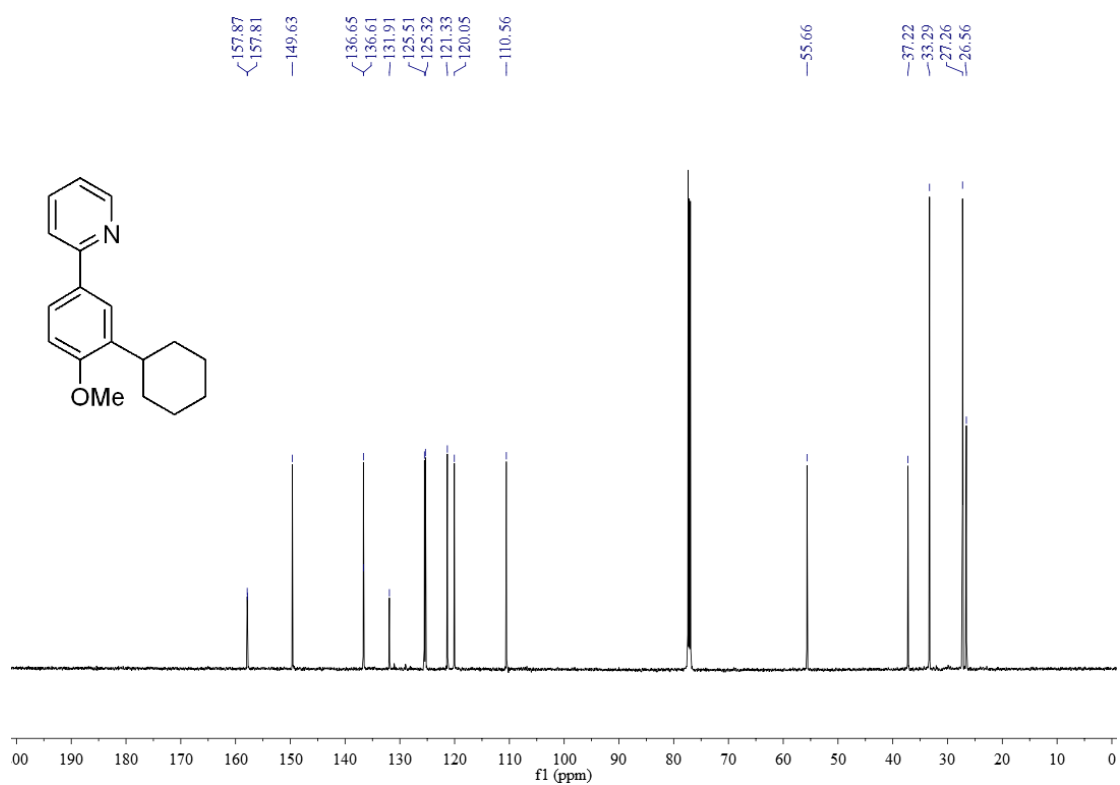

<sup>1</sup>H NMR of **4j**

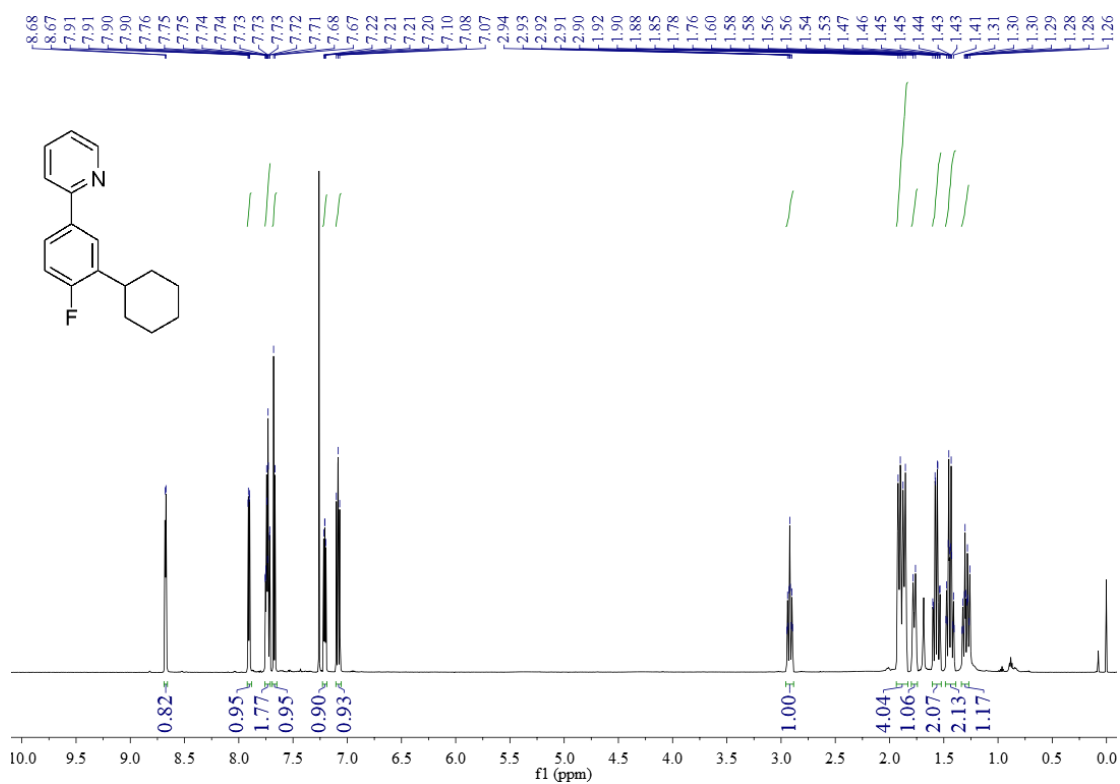

<sup>13</sup>C NMR of **4j**

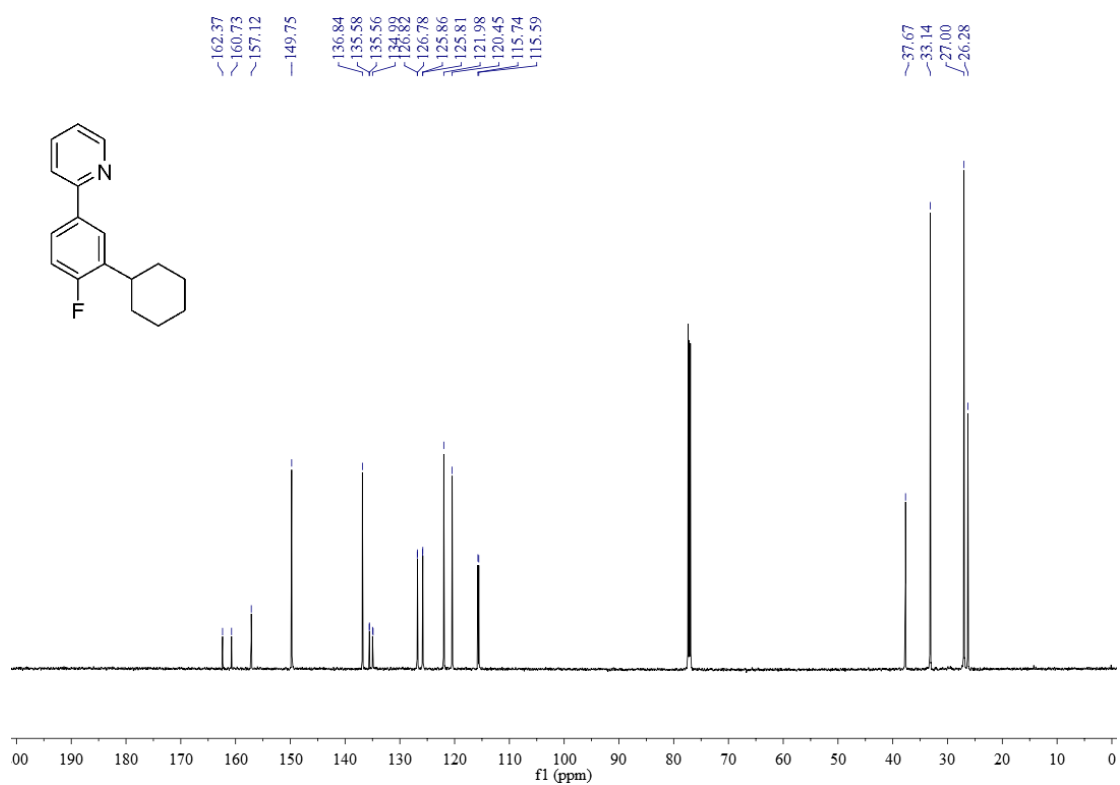

$^{19}\text{F}$  NMR of **4j**

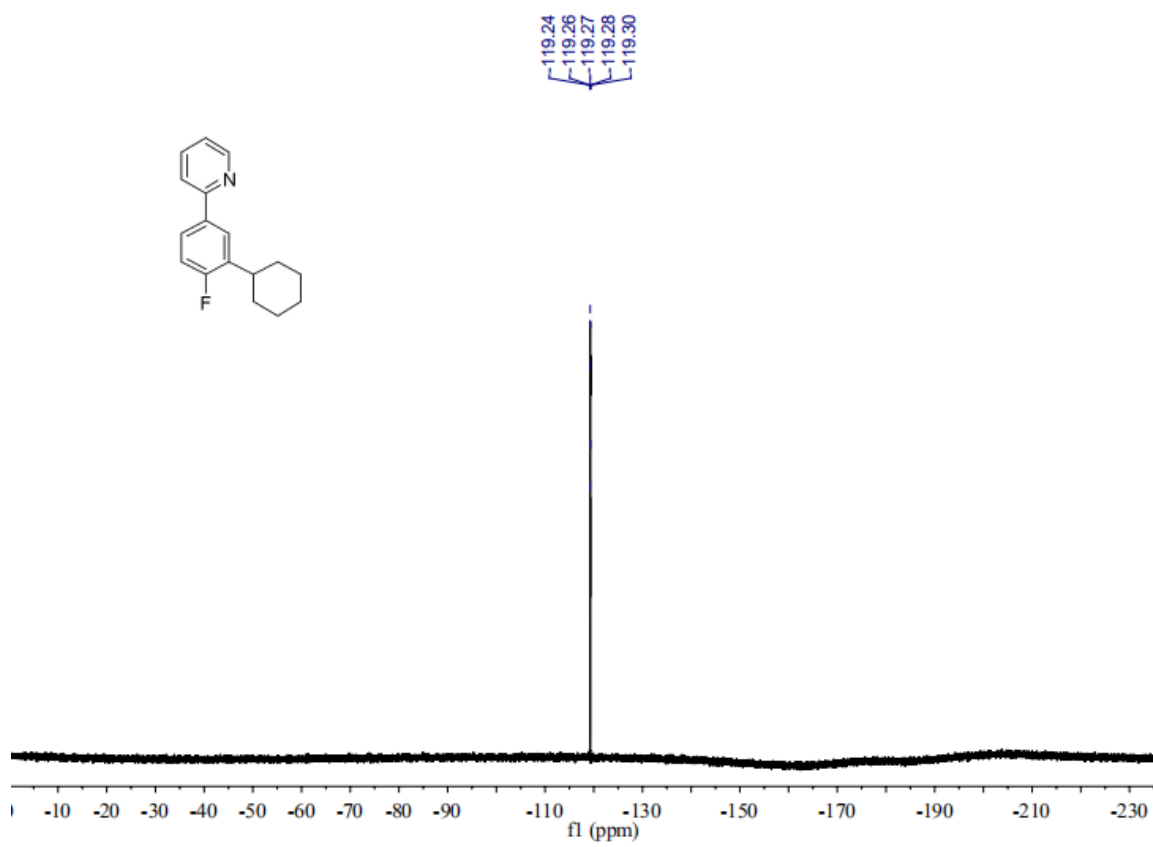

$^1\text{H}$  NMR of **4k**

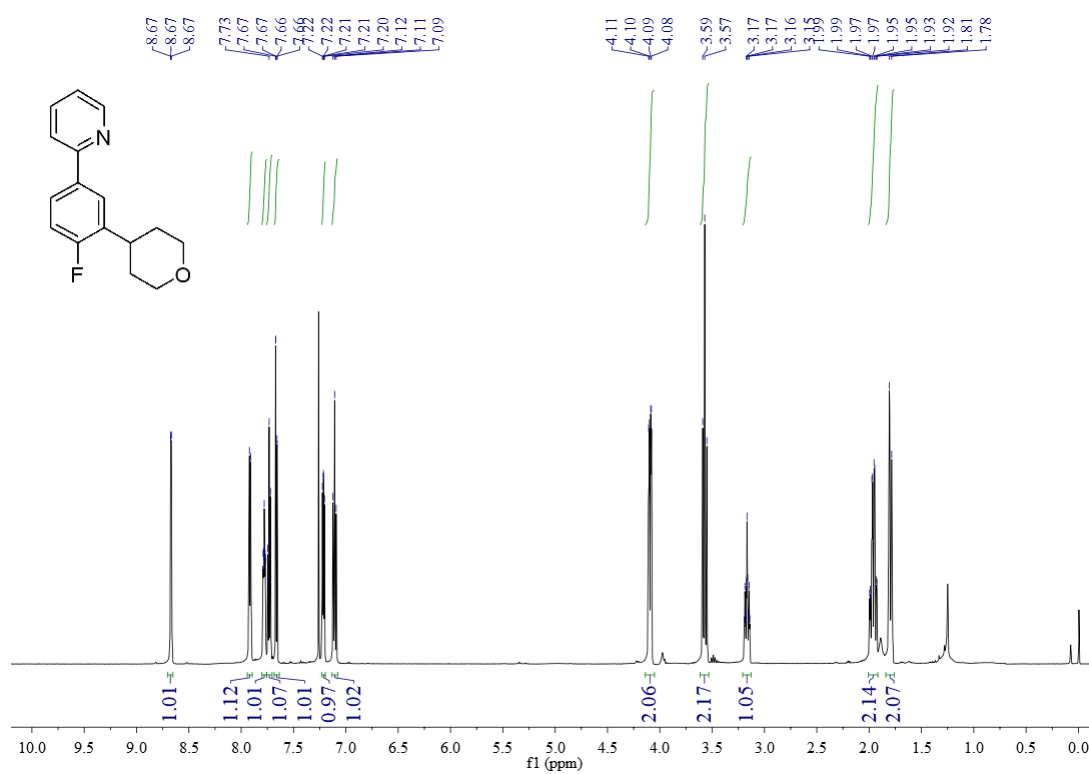

<sup>13</sup>C NMR of **4k**

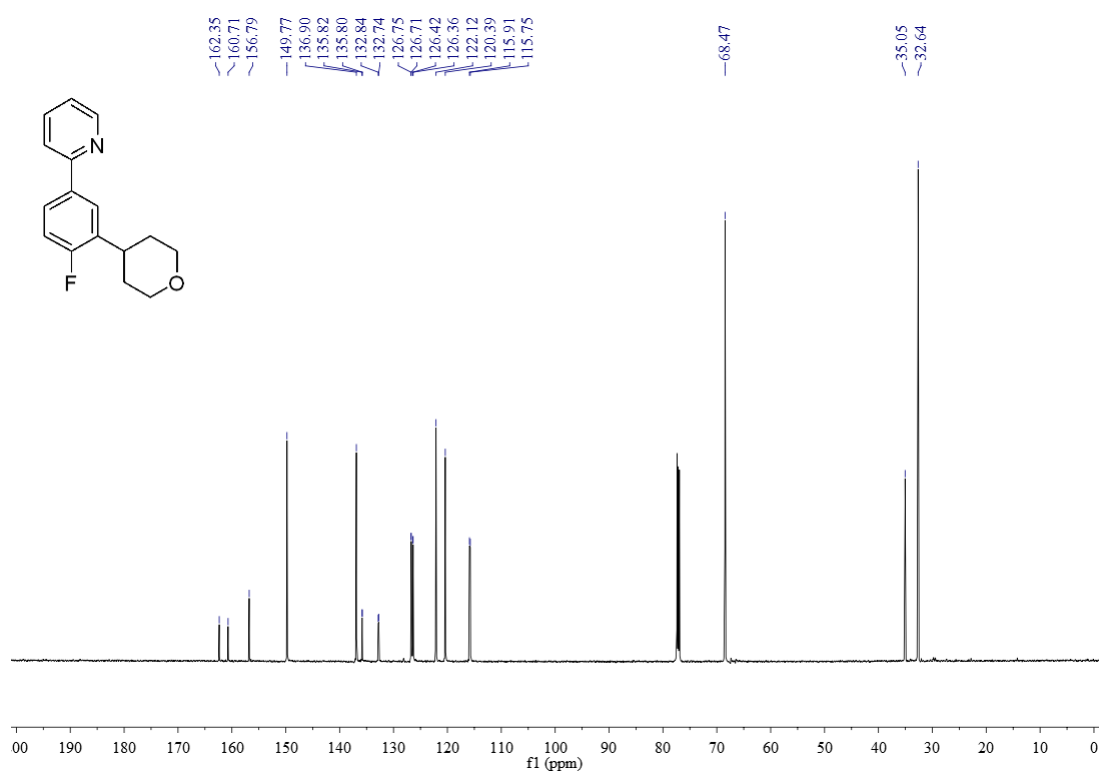

<sup>19</sup>F NMR of **4k**

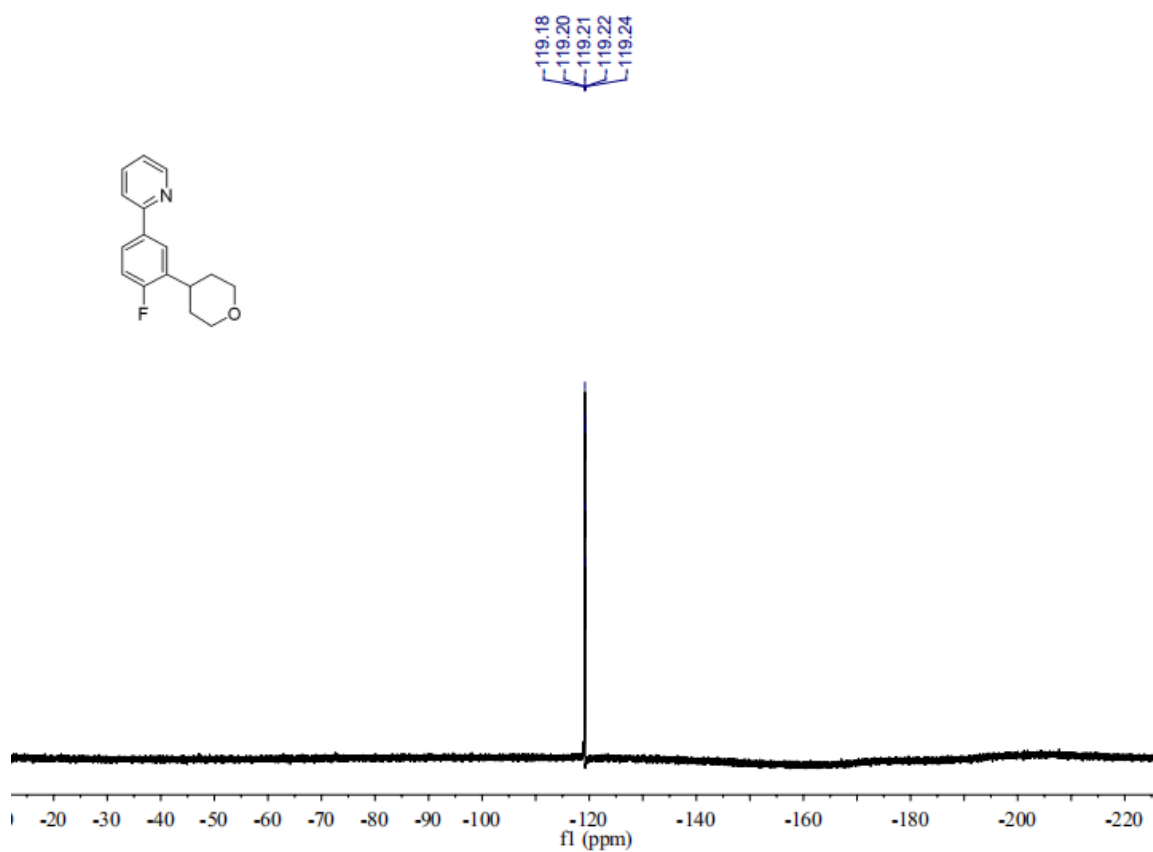

<sup>1</sup>H NMR of **4l**

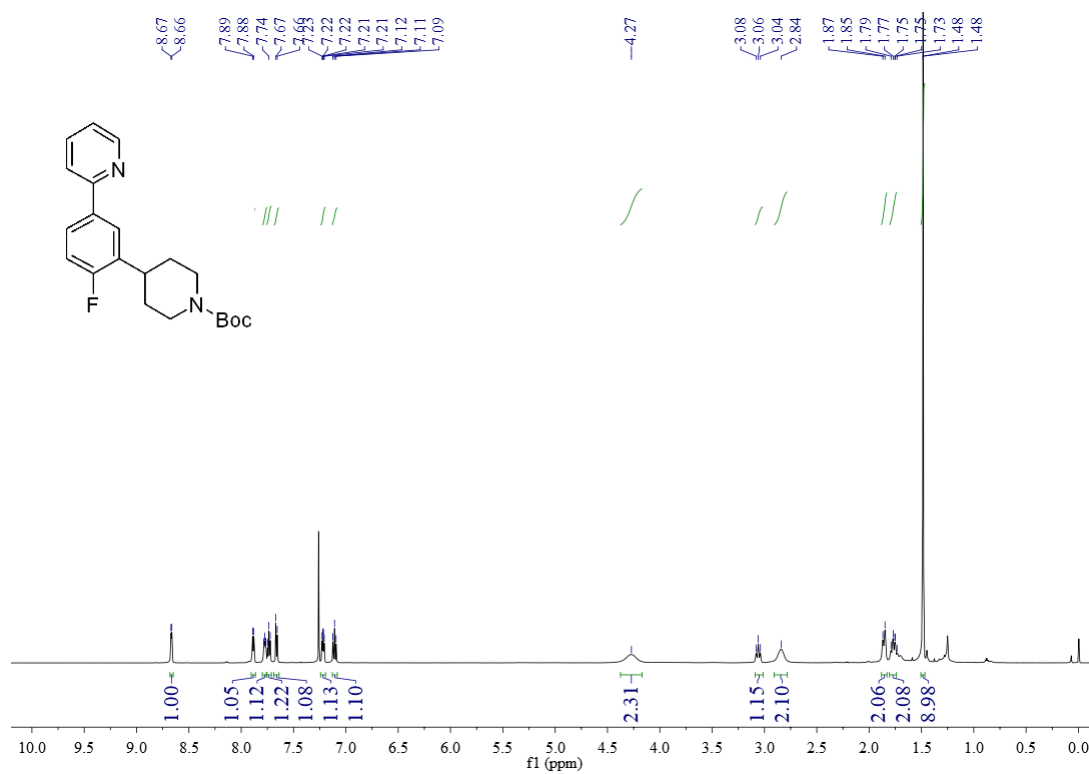

<sup>13</sup>C NMR of **4l**

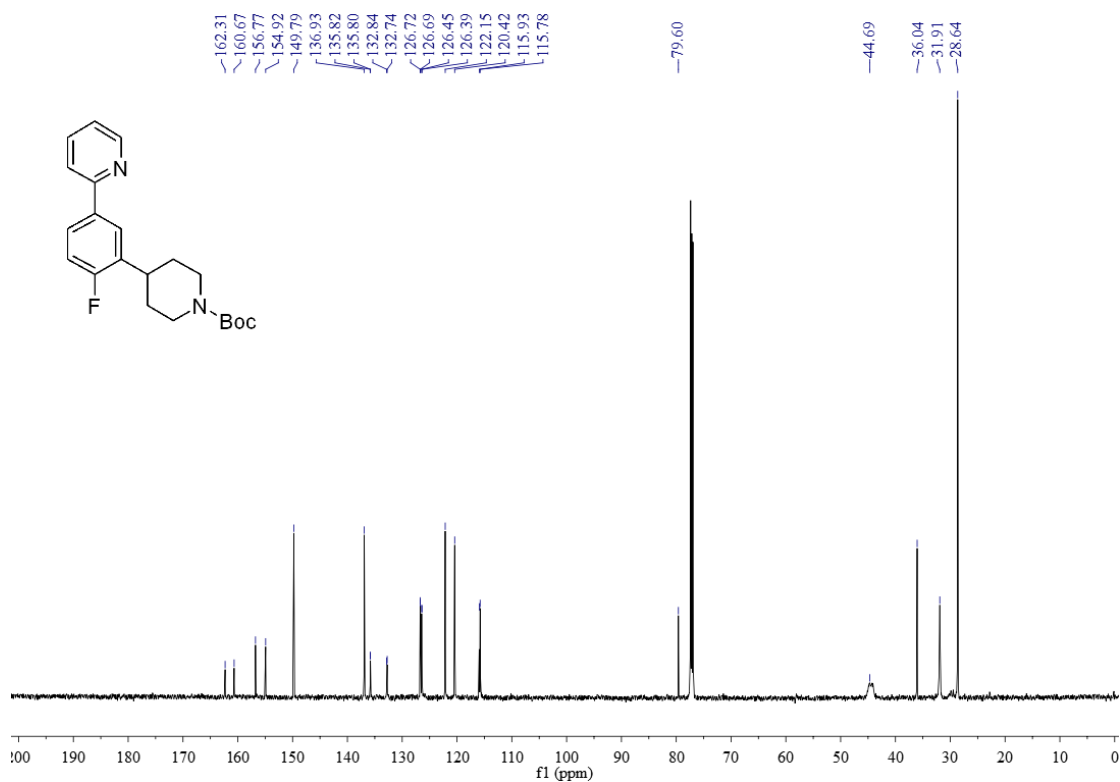

Cc1ccc(cc1C2CCN(C2)C(=O)OC(=O)c3ccccc3)c4ccccc4

Chemical structure of the compound is shown above the spectrum. The x-axis is labeled "f1 (ppm)" and ranges from -10 to -220. The y-axis is labeled "Intensity". A single sharp peak is visible at -119.16 ppm, labeled with its chemical shift value.

**Chemical Structure of 10:** NS(=O)(=O)c1ccc(cc1C2CCN(CC2)c3ccc(cc3F)c4cccnc4)C5

**<sup>1</sup>H NMR Spectrum (CDCl<sub>3</sub>):**

**Chemical Shifts (ppm):** 8.67, 8.66, 8.66, 8.66, 7.86, 7.85, 7.84, 7.79, 7.78, 7.77, 7.77, 7.76, 7.76, 7.75, 7.74, 7.74, 7.73, 7.73, 7.69, 7.68, 7.65, 7.64, 7.35, 7.34, 7.23, 7.23, 7.22, 7.21, 7.21, 7.09, 7.08, 7.06, 7.06, 3.97, 3.95, 2.83, 2.82, 2.44, 2.41, 2.40, 2.39, 2.38, 2.37, 2.36, 1.98, 1.98, 1.96, 1.94, 1.93, 1.93, 1.91.

**Integration Values:** 1.01, 1.14, 2.10, 2.07, 1.08, 2.01, 1.01, 1.03, 2.03, 1.19, 3.19, 2.08, 2.06, 2.10.

<sup>13</sup>C NMR of **4m**

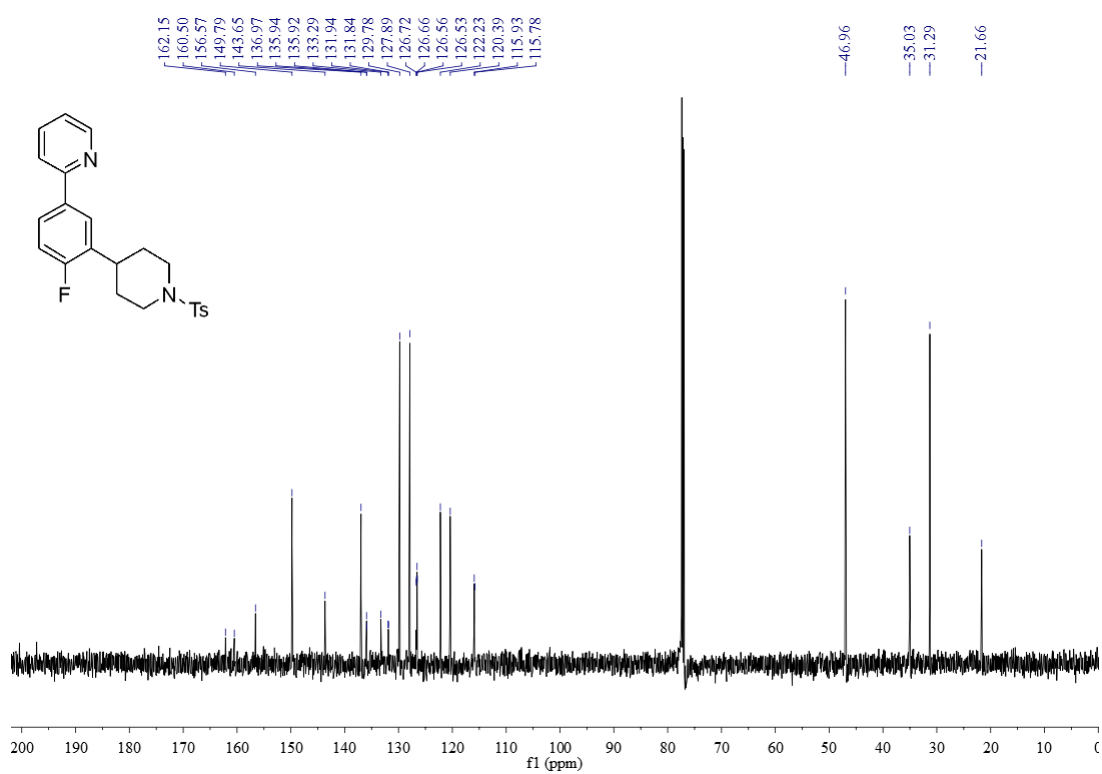

<sup>19</sup>F NMR of **4m**

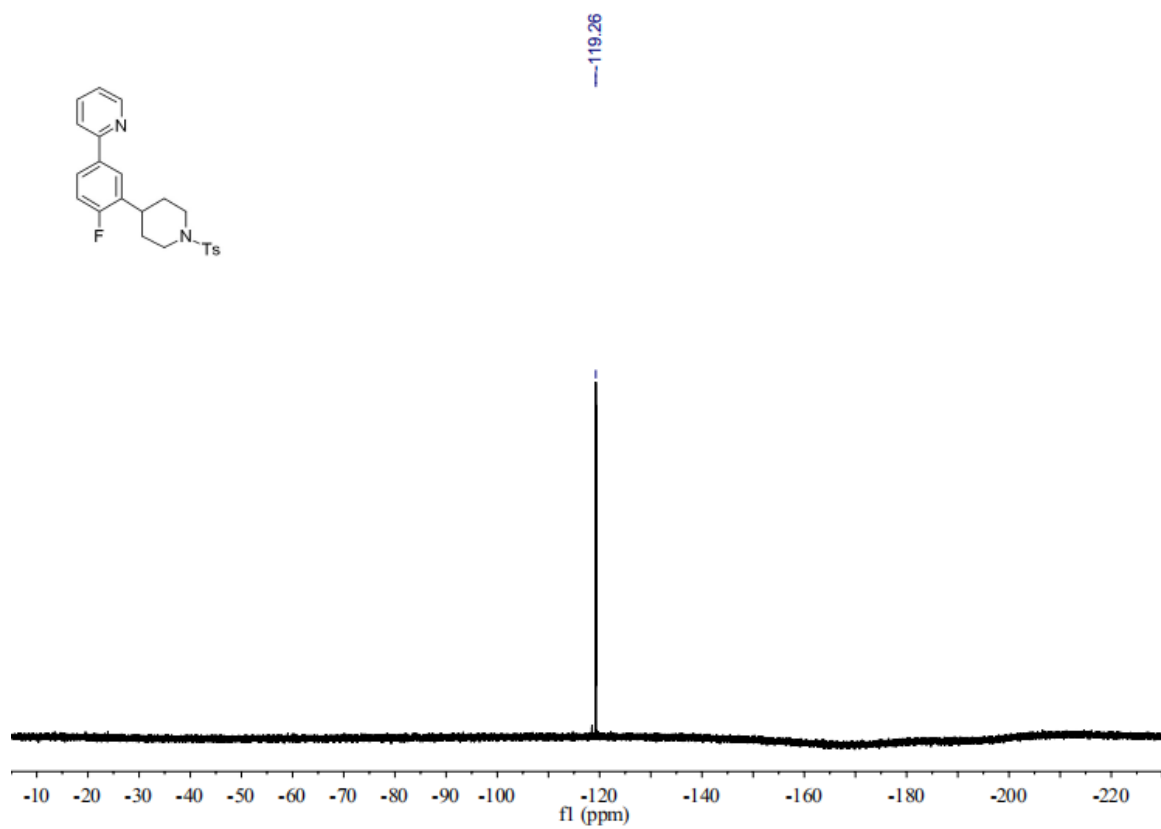

$^1\text{H}$  NMR of **4n**

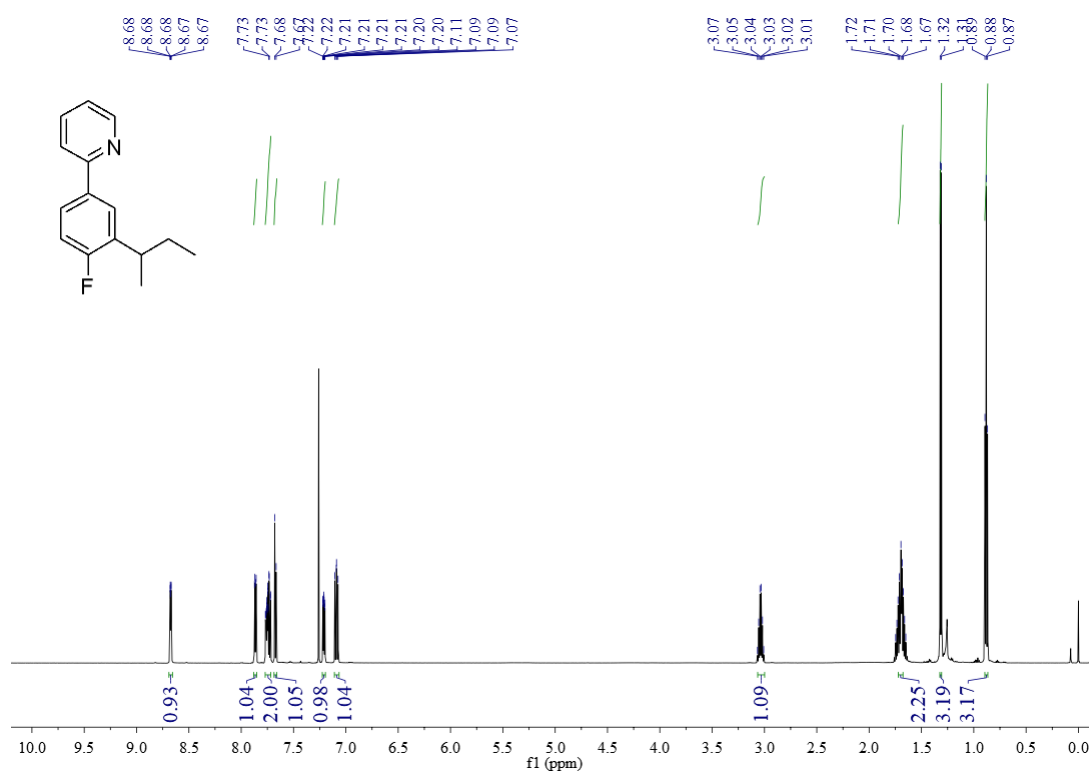

$^{13}\text{C}$  NMR of **4n**

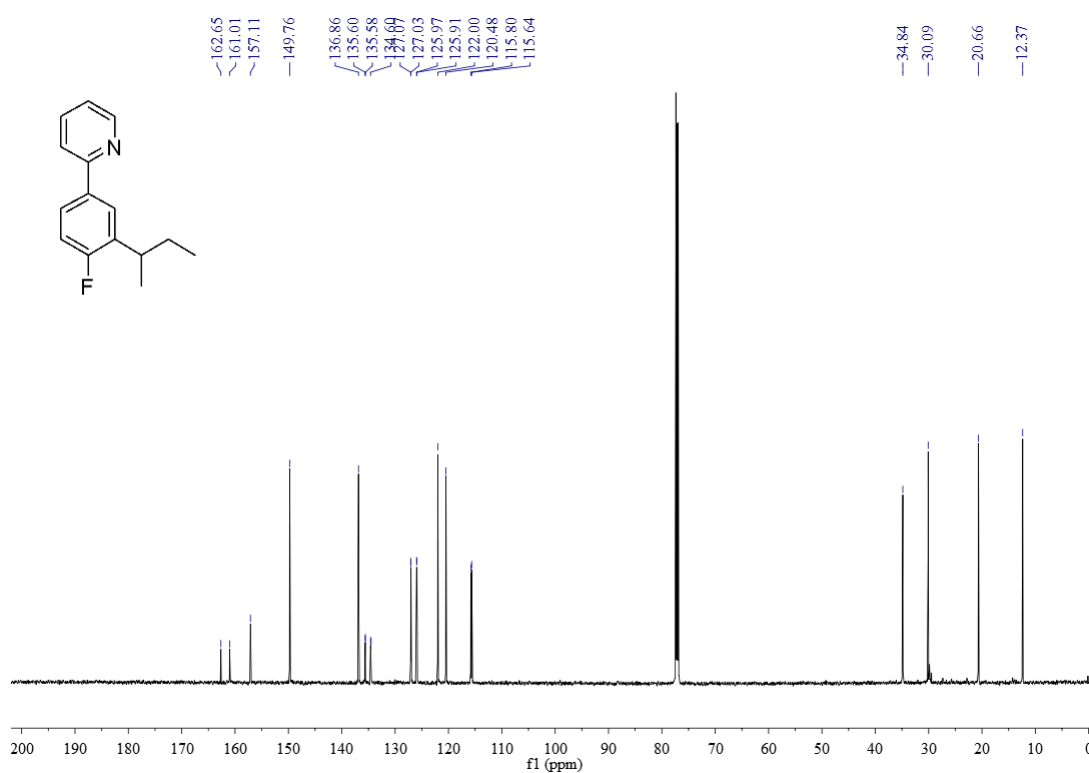

$^{19}\text{F}$  NMR of **4n**

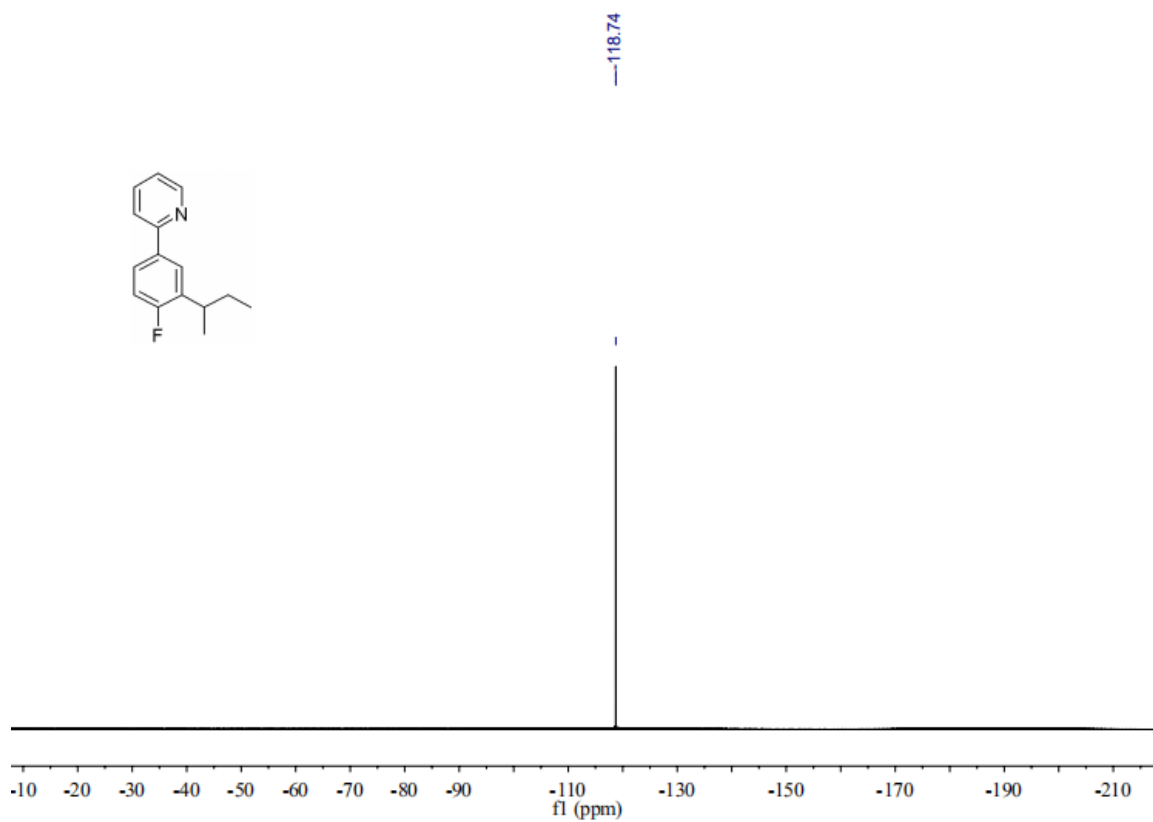

$^1\text{H}$  NMR of **4o**

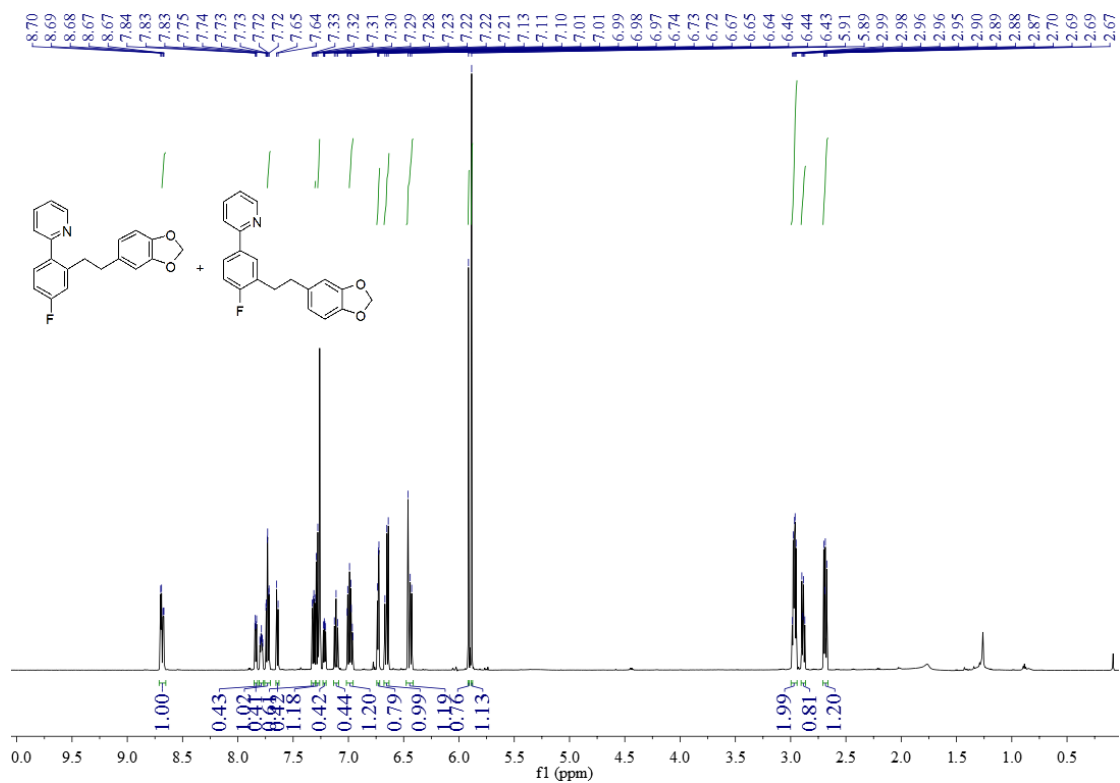

<sup>13</sup>C NMR of **4o**

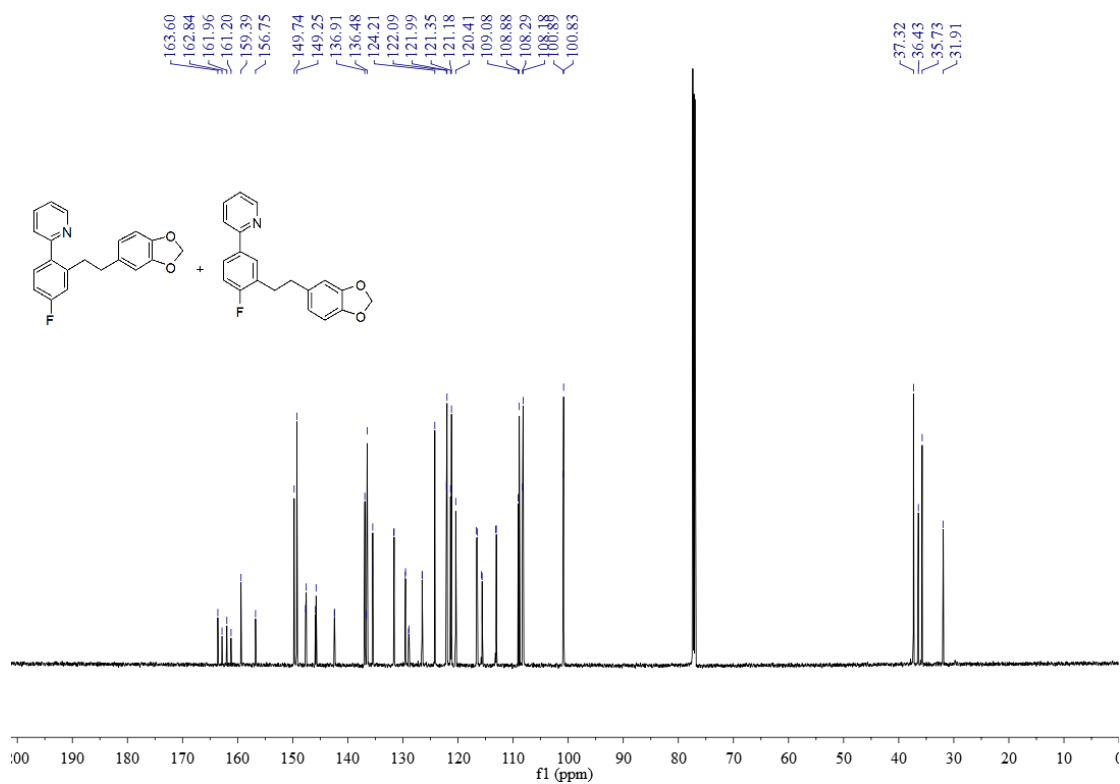

<sup>19</sup>F NMR of **4o**

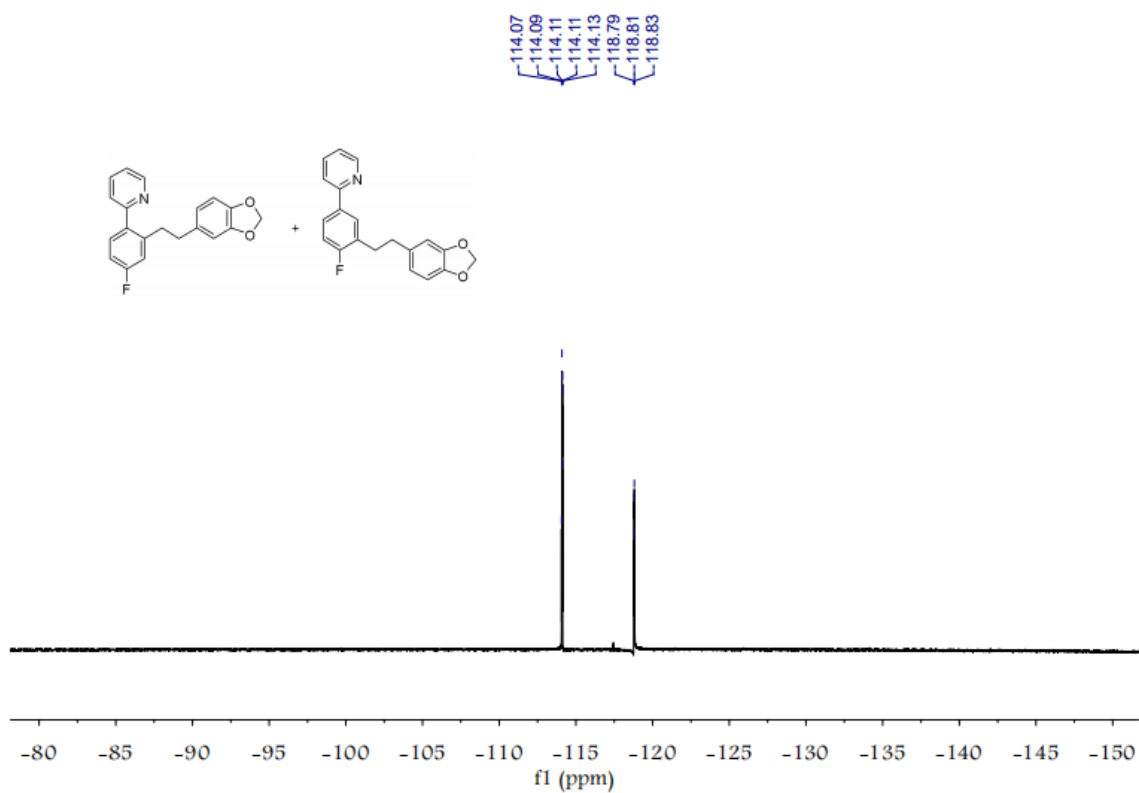

# <sup>1</sup>H NMR of **4p**

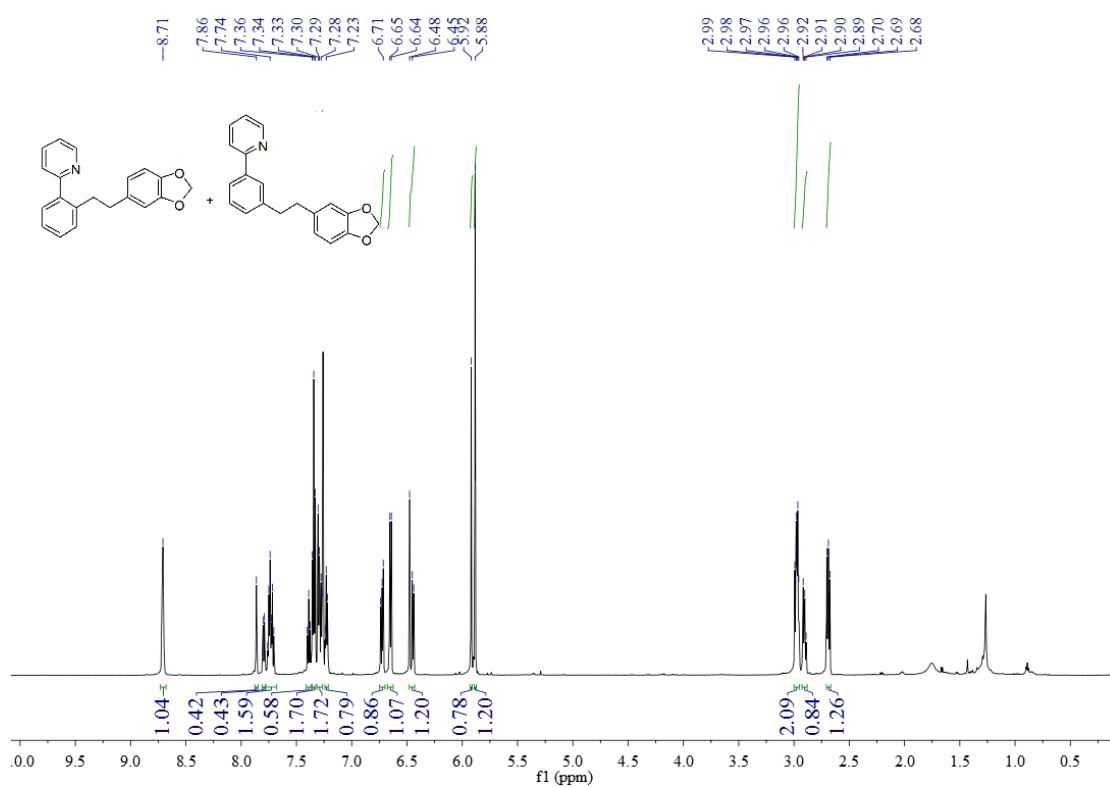

# <sup>13</sup>C NMR of **4p**

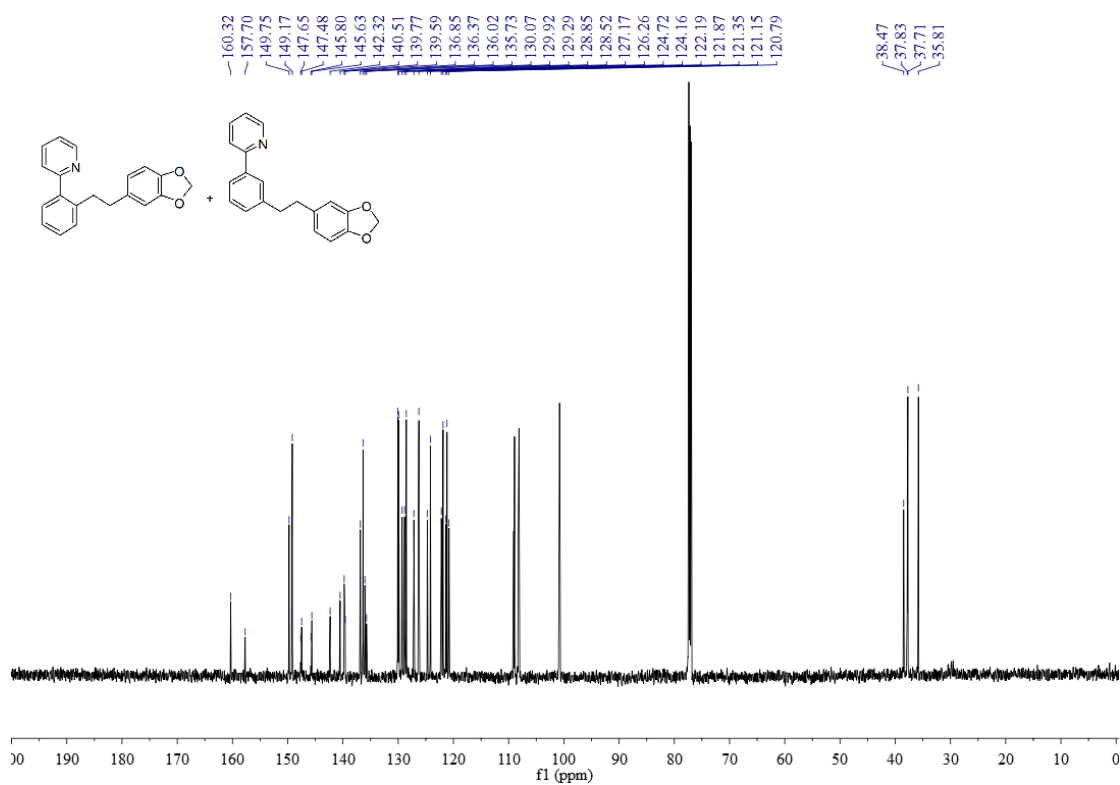

Supplement: d1cc00039j1.pdf [file d1cc00039j1.pdf]
